# Supplementary material
Source: publisher site journal article supplement (https://www.dovepress.com/get_supplementary_file.php?f=supplementary_file_74298.pdf)
Supplement: Supplementary file 1 [file get_supplementary_file.php]

# Online supplement - Individual Search Strategies

## OVID MEDLINE

| #  | Searches                                                                                                                                                                                               |
|----|--------------------------------------------------------------------------------------------------------------------------------------------------------------------------------------------------------|
| 1  | Human Activities/                                                                                                                                                                                      |
| 2  | "Activities of Daily Living"/                                                                                                                                                                          |
| 3  | Leisure Activities/                                                                                                                                                                                    |
| 4  | human activit*.mp. [mp=protocol supplementary concept, rare disease supplementary concept, title, original title, abstract, name of substance word, subject heading word, unique identifier]           |
| 5  | activit* of daily living.mp. [mp=protocol supplementary concept, rare disease supplementary concept, title, original title, abstract, name of substance word, subject heading word, unique identifier] |
| 6  | adl*.mp. [mp=protocol supplementary concept, rare disease supplementary concept, title, original title, abstract, name of substance word, subject heading word, unique identifier]                     |
| 7  | leisure activit*.mp. [mp=protocol supplementary concept, rare disease supplementary concept, title, original title, abstract, name of substance word, subject heading word, unique identifier]         |
| 8  | free living activit*.mp. [mp=protocol supplementary concept, rare disease supplementary concept, title, original title, abstract, name of substance word, subject heading word, unique identifier]     |
| 9  | 1 or 2 or 3 or 4 or 5 or 6 or 7 or 8                                                                                                                                                                   |
| 10 | Motor Activity/                                                                                                                                                                                        |
| 11 | Exercise/                                                                                                                                                                                              |
| 12 | Walking/                                                                                                                                                                                               |
| 13 | physical activit*.mp. [mp=protocol supplementary concept, rare disease supplementary concept, title, original title, abstract, name of substance word, subject heading word, unique identifier]        |
| 14 | physical exercise.mp. [mp=protocol supplementary concept, rare disease supplementary concept, title, original title, abstract, name of substance word, subject heading word, unique identifier]        |
| 15 | exercise.mp. [mp=protocol supplementary concept, rare disease supplementary concept, title, original title, abstract, name of substance word, subject heading word, unique identifier]                 |
| 16 | walk*.mp. [mp=protocol supplementary concept, rare disease supplementary concept, title, original title, abstract, name of substance word, subject heading word, unique identifier]                    |
| 17 | 10 or 11 or 12 or 13 or 14 or 15 or 16                                                                                                                                                                 |
| 18 | Life Style/                                                                                                                                                                                            |
| 19 | Sedentary Lifestyle/                                                                                                                                                                                   |
| 20 | Supine Position/ or Posture/                                                                                                                                                                           |
| 21 | sedentary behaviour*.mp. [mp=protocol supplementary concept, rare disease supplementary concept, title, original title, abstract, name of substance word, subject heading word, unique identifier]     |
| 22 | sedentary behavior*.mp. [mp=protocol supplementary concept, rare disease supplementary concept, title, original title, abstract, name of substance word, subject heading word, unique identifier]      |
| 23 | sedentary lifestyle*.mp. [mp=protocol supplementary concept, rare disease supplementary concept, title, original title, abstract, name of substance word, subject heading word, unique identifier]     |
| 24 | lying*.mp. [mp=protocol supplementary concept, rare disease supplementary concept, title, original title, abstract, name of substance word, subject heading word, unique identifier]                   |
| 25 | sitting.mp. [mp=protocol supplementary concept, rare disease supplementary concept, title, original title, abstract, name of substance word, subject heading word, unique identifier]                  |
| 26 | 18 or 19 or 20 or 21 or 22 or 23 or 24 or 25                                                                                                                                                           |
| 27 | Sleep/                                                                                                                                                                                                 |
| 28 | sleep.mp. [mp=protocol supplementary concept, rare disease supplementary concept, title, original title, abstract, name of substance word, subject heading word, unique identifier]                    |
| 29 | sleep duration.mp. [mp=protocol supplementary concept, rare disease supplementary concept, title, original title, abstract, name of substance word, subject heading word, unique identifier]           |
| 30 | sleep quality.mp. [mp=protocol supplementary concept, rare disease supplementary concept, title, original title, abstract, name of substance word, subject heading word, unique identifier]            |
| 31 | 27 or 28 or 29 or 30                                                                                                                                                                                   |
| 32 | Occupations/                                                                                                                                                                                           |
| 33 | Employment/                                                                                                                                                                                            |
| 34 | Housekeeping/                                                                                                                                                                                          |
| 35 | occupation.mp. [mp=protocol supplementary concept, rare disease supplementary concept, title, original title, abstract, name of substance word, subject heading word, unique identifier]               |
| 36 | paid work.mp. [mp=protocol supplementary concept, rare disease supplementary concept, title, original title, abstract, name of substance word, subject heading word, unique identifier]                |
| 37 | employment.mp. [mp=protocol supplementary concept, rare disease supplementary concept, title, original title, abstract, name of substance word, subject heading word, unique identifier]               |
| 38 | housework.mp. [mp=protocol supplementary concept, rare disease supplementary concept, title, original title, abstract, name of substance word, subject heading word, unique identifier]                |
| 39 | housekeeping.mp. [mp=protocol supplementary concept, rare disease supplementary concept, title, original                                                                                               |

|    |                                                                                                                                                                                                                     |
|----|---------------------------------------------------------------------------------------------------------------------------------------------------------------------------------------------------------------------|
|    | title, abstract, name of substance word, subject heading word, unique identifier]                                                                                                                                   |
| 40 | chores.mp. [mp=protocol supplementary concept, rare disease supplementary concept, title, original title, abstract, name of substance word, subject heading word, unique identifier]                                |
| 41 | 32 or 33 or 34 or 35 or 36 or 37 or 38 or 39 or 40                                                                                                                                                                  |
| 42 | Television/                                                                                                                                                                                                         |
| 43 | Computers/                                                                                                                                                                                                          |
| 44 | "Play and Playthings"/ or Video Games/                                                                                                                                                                              |
| 45 | screen time.mp. [mp=protocol supplementary concept, rare disease supplementary concept, title, original title, abstract, name of substance word, subject heading word, unique identifier]                           |
| 46 | television viewing.mp. [mp=protocol supplementary concept, rare disease supplementary concept, title, original title, abstract, name of substance word, subject heading word, unique identifier]                    |
| 47 | television watching.mp. [mp=protocol supplementary concept, rare disease supplementary concept, title, original title, abstract, name of substance word, subject heading word, unique identifier]                   |
| 48 | television.mp. [mp=protocol supplementary concept, rare disease supplementary concept, title, original title, abstract, name of substance word, subject heading word, unique identifier]                            |
| 49 | "computer use".mp. [mp=protocol supplementary concept, rare disease supplementary concept, title, original title, abstract, name of substance word, subject heading word, unique identifier]                        |
| 50 | play.mp. [mp=protocol supplementary concept, rare disease supplementary concept, title, original title, abstract, name of substance word, subject heading word, unique identifier]                                  |
| 51 | videogame play*.mp. [mp=protocol supplementary concept, rare disease supplementary concept, title, original title, abstract, name of substance word, subject heading word, unique identifier]                       |
| 52 | 42 or 43 or 44 or 45 or 46 or 47 or 48 or 49 or 50 or 51                                                                                                                                                            |
| 53 | Time Factors/                                                                                                                                                                                                       |
| 54 | Behavior/                                                                                                                                                                                                           |
| 55 | Interpersonal Relations/                                                                                                                                                                                            |
| 56 | "use of time".mp.                                                                                                                                                                                                   |
| 57 | behavioural profile*.mp.                                                                                                                                                                                            |
| 58 | behavioral profile*.mp. [mp=protocol supplementary concept, rare disease supplementary concept, title, original title, abstract, name of substance word, subject heading word, unique identifier]                   |
| 59 | "time use".mp. [mp=protocol supplementary concept, rare disease supplementary concept, title, original title, abstract, name of substance word, subject heading word, unique identifier]                            |
| 60 | "time factor*".mp. [mp=protocol supplementary concept, rare disease supplementary concept, title, original title, abstract, name of substance word, subject heading word, unique identifier]                        |
| 61 | social interaction*.mp. [mp=protocol supplementary concept, rare disease supplementary concept, title, original title, abstract, name of substance word, subject heading word, unique identifier]                   |
| 62 | social behaviour*.mp. [mp=protocol supplementary concept, rare disease supplementary concept, title, original title, abstract, name of substance word, subject heading word, unique identifier]                     |
| 63 | social behavior*.mp. [mp=protocol supplementary concept, rare disease supplementary concept, title, original title, abstract, name of substance word, subject heading word, unique identifier]                      |
| 64 | 53 or 54 or 55 or 56 or 57 or 58 or 59 or 60 or 61 or 62 or 63                                                                                                                                                      |
| 65 | 9 or 17 or 26 or 31 or 41 or 52 or 64                                                                                                                                                                               |
| 66 | Pulmonary Disease, Chronic Obstructive/                                                                                                                                                                             |
| 67 | copd.mp. [mp=protocol supplementary concept, rare disease supplementary concept, title, original title, abstract, name of substance word, subject heading word, unique identifier]                                  |
| 68 | CHRONIC OBSTRUCTIVE PULMONARY DISEASE.mp. [mp=protocol supplementary concept, rare disease supplementary concept, title, original title, abstract, name of substance word, subject heading word, unique identifier] |
| 69 | 66 or 67 or 68                                                                                                                                                                                                      |
| 70 | 65 and 69                                                                                                                                                                                                           |
| 71 | limit 70 to humans                                                                                                                                                                                                  |

**Table OS1.1:** Search strategy – Ovid Medline.

| #  | Searches                                                                                                                                                                               |
|----|----------------------------------------------------------------------------------------------------------------------------------------------------------------------------------------|
| 1  | exp human activities/                                                                                                                                                                  |
| 2  | exp physical activity/                                                                                                                                                                 |
| 3  | human activit*.mp. [mp=title, abstract, subject headings, heading word, drug trade name, original title, device manufacturer, drug manufacturer, device trade name, keyword]           |
| 4  | activit* of daily living.mp. [mp=title, abstract, subject headings, heading word, drug trade name, original title, device manufacturer, drug manufacturer, device trade name, keyword] |
| 5  | adl*.mp. [mp=title, abstract, subject headings, heading word, drug trade name, original title, device manufacturer, drug manufacturer, device trade name, keyword]                     |
| 6  | leisure activit*.mp. [mp=title, abstract, subject headings, heading word, drug trade name, original title, device manufacturer, drug manufacturer, device trade name, keyword]         |
| 7  | free living activit*.mp. [mp=title, abstract, subject headings, heading word, drug trade name, original title, device manufacturer, drug manufacturer, device trade name, keyword]     |
| 8  | 1 or 2 or 3 or 4 or 5 or 6 or 7                                                                                                                                                        |
| 9  | exp "physical activity, capacity and performance"/                                                                                                                                     |
| 10 | exp locomotion/                                                                                                                                                                        |
| 11 | physical activit*.mp. [mp=title, abstract, subject headings, heading word, drug trade name, original title, device manufacturer, drug manufacturer, device trade name, keyword]        |
| 12 | physical exercis*.mp. [mp=title, abstract, subject headings, heading word, drug trade name, original title, device manufacturer, drug manufacturer, device trade name, keyword]        |
| 13 | exercis*.mp. [mp=title, abstract, subject headings, heading word, drug trade name, original title, device manufacturer, drug manufacturer, device trade name, keyword]                 |
| 14 | walk*.mp. [mp=title, abstract, subject headings, heading word, drug trade name, original title, device manufacturer, drug manufacturer, device trade name, keyword]                    |
| 15 | 9 or 10 or 11 or 12 or 13 or 14                                                                                                                                                        |
| 16 | exp "lifestyle and related phenomena"/                                                                                                                                                 |
| 17 | exp body position/                                                                                                                                                                     |
| 18 | sedentary behaviour*.mp. [mp=title, abstract, subject headings, heading word, drug trade name, original title, device manufacturer, drug manufacturer, device trade name, keyword]     |
| 19 | sedentary behavior*.mp. [mp=title, abstract, subject headings, heading word, drug trade name, original title, device manufacturer, drug manufacturer, device trade name, keyword]      |
| 20 | sedentary lifestyle*.mp. [mp=title, abstract, subject headings, heading word, drug trade name, original title, device manufacturer, drug manufacturer, device trade name, keyword]     |
| 21 | lying.mp. [mp=title, abstract, subject headings, heading word, drug trade name, original title, device manufacturer, drug manufacturer, device trade name, keyword]                    |
| 22 | sitting.mp. [mp=title, abstract, subject headings, heading word, drug trade name, original title, device manufacturer, drug manufacturer, device trade name, keyword]                  |
| 23 | 16 or 17 or 18 or 19 or 20 or 21 or 22                                                                                                                                                 |
| 24 | exp sleep/                                                                                                                                                                             |
| 25 | sleep quality.mp. [mp=title, abstract, subject headings, heading word, drug trade name, original title, device manufacturer, drug manufacturer, device trade name, keyword]            |
| 26 | sleep duration.mp. [mp=title, abstract, subject headings, heading word, drug trade name, original title, device manufacturer, drug manufacturer, device trade name, keyword]           |
| 27 | 24 or 25 or 26                                                                                                                                                                         |
| 28 | exp occupation/                                                                                                                                                                        |
| 29 | exp work/                                                                                                                                                                              |
| 30 | occupation*.mp. [mp=title, abstract, subject headings, heading word, drug trade name, original title, device manufacturer, drug manufacturer, device trade name, keyword]              |
| 31 | paid work.mp. [mp=title, abstract, subject headings, heading word, drug trade name, original title, device manufacturer, drug manufacturer, device trade name, keyword]                |
| 32 | employment.mp. [mp=title, abstract, subject headings, heading word, drug trade name, original title, device manufacturer, drug manufacturer, device trade name, keyword]               |
| 33 | housework.mp. [mp=title, abstract, subject headings, heading word, drug trade name, original title, device manufacturer, drug manufacturer, device trade name, keyword]                |
| 34 | house work.mp. [mp=title, abstract, subject headings, heading word, drug trade name, original title, device manufacturer, drug manufacturer, device trade name, keyword]               |
| 35 | chores.mp. [mp=title, abstract, subject headings, heading word, drug trade name, original title, device manufacturer, drug manufacturer, device trade name, keyword]                   |
| 36 | housekeeping.mp. [mp=title, abstract, subject headings, heading word, drug trade name, original title, device manufacturer, drug manufacturer, device trade name, keyword]             |
| 37 | house keeping.mp. [mp=title, abstract, subject headings, heading word, drug trade name, original title, device manufacturer, drug manufacturer, device trade name, keyword]            |
| 38 | 28 or 29 or 30 or 31 or 32 or 33 or 34 or 35 or 36 or 37                                                                                                                               |

|    |                                                                                                                                                                                                     |
|----|-----------------------------------------------------------------------------------------------------------------------------------------------------------------------------------------------------|
| 39 | exp television viewing/                                                                                                                                                                             |
| 40 | exp Internet/                                                                                                                                                                                       |
| 41 | exp recreation/                                                                                                                                                                                     |
| 42 | screen time.mp. [mp=title, abstract, subject headings, heading word, drug trade name, original title, device manufacturer, drug manufacturer, device trade name, keyword]                           |
| 43 | television viewing.mp. [mp=title, abstract, subject headings, heading word, drug trade name, original title, device manufacturer, drug manufacturer, device trade name, keyword]                    |
| 44 | television watching.mp. [mp=title, abstract, subject headings, heading word, drug trade name, original title, device manufacturer, drug manufacturer, device trade name, keyword]                   |
| 45 | "computer use".mp. [mp=title, abstract, subject headings, heading word, drug trade name, original title, device manufacturer, drug manufacturer, device trade name, keyword]                        |
| 46 | "internet use".mp. [mp=title, abstract, subject headings, heading word, drug trade name, original title, device manufacturer, drug manufacturer, device trade name, keyword]                        |
| 47 | "video game use".mp. [mp=title, abstract, subject headings, heading word, drug trade name, original title, device manufacturer, drug manufacturer, device trade name, keyword]                      |
| 48 | 39 or 40 or 41 or 42 or 43 or 44 or 45 or 46 or 47                                                                                                                                                  |
| 49 | exp time/                                                                                                                                                                                           |
| 50 | "use of time".mp. [mp=title, abstract, subject headings, heading word, drug trade name, original title, device manufacturer, drug manufacturer, device trade name, keyword]                         |
| 51 | behavioural profile*.mp. [mp=title, abstract, subject headings, heading word, drug trade name, original title, device manufacturer, drug manufacturer, device trade name, keyword]                  |
| 52 | behavioral profile*.mp. [mp=title, abstract, subject headings, heading word, drug trade name, original title, device manufacturer, drug manufacturer, device trade name, keyword]                   |
| 53 | "time use".mp. [mp=title, abstract, subject headings, heading word, drug trade name, original title, device manufacturer, drug manufacturer, device trade name, keyword]                            |
| 54 | time factor*.mp. [mp=title, abstract, subject headings, heading word, drug trade name, original title, device manufacturer, drug manufacturer, device trade name, keyword]                          |
| 55 | social interaction*.mp. [mp=title, abstract, subject headings, heading word, drug trade name, original title, device manufacturer, drug manufacturer, device trade name, keyword]                   |
| 56 | social behavior*.mp. [mp=title, abstract, subject headings, heading word, drug trade name, original title, device manufacturer, drug manufacturer, device trade name, keyword]                      |
| 57 | social behaviour*.mp. [mp=title, abstract, subject headings, heading word, drug trade name, original title, device manufacturer, drug manufacturer, device trade name, keyword]                     |
| 58 | 49 or 50 or 51 or 52 or 53 or 54 or 55 or 56 or 57                                                                                                                                                  |
| 59 | 8 or 15 or 23 or 27 or 38 or 48 or 58                                                                                                                                                               |
| 60 | exp chronic obstructive lung disease/                                                                                                                                                               |
| 61 | COPD.mp. [mp=title, abstract, subject headings, heading word, drug trade name, original title, device manufacturer, drug manufacturer, device trade name, keyword]                                  |
| 62 | chronic obstructive pulmonary disease.mp. [mp=title, abstract, subject headings, heading word, drug trade name, original title, device manufacturer, drug manufacturer, device trade name, keyword] |
| 63 | 60 or 61 or 62                                                                                                                                                                                      |
| 64 | 59 and 63                                                                                                                                                                                           |
| 65 | limit 64 to human                                                                                                                                                                                   |

**Table OS1.2:** Search strategy – Embase

EBSCO HOST

|     |                                                                                                                                                                        |
|-----|------------------------------------------------------------------------------------------------------------------------------------------------------------------------|
| S1  | human activities OR activities of daily living OR leisure activities OR human activit* OR activit* of daily living OR adl* OR leisure activit* OR free living activit* |
| S2  | exercise OR walking OR physical activit* OR physical exercise OR walk*                                                                                                 |
| S3  | lifestyle* OR sedentary lifestyle* OR sedentary behav*r* OR lying OR sitting                                                                                           |
| S4  | sleep OR sleep duration OR sleep quality                                                                                                                               |
| S5  | OCCUPATION* OR employment OR housekeeping OR paid work OR housework OR chores                                                                                          |
| S6  | television OR computer* OR play* OR video games OR screen time OR television view* OR television watch*                                                                |
| S7  | use of time OR behvi*r OR interpersonal relations OR behavi*ral profiles OR time use OR time factors OR social interact* OR socal behavi*r                             |
| S8  | S1 OR S2 OR S3 OR S4 OR S5 OR S6 OR S7                                                                                                                                 |
| S9  | COPD OR chronic obstructive pulmonary disease                                                                                                                          |
| S10 | S8 AND S9                                                                                                                                                              |

**Table OS1.3:** Search strategy – EBSCO HOST

# SAGE JOURNALS

|    |     |                                                              |
|----|-----|--------------------------------------------------------------|
| 1  |     | human activities or activities of daily living in all fields |
| 2  | or  | leisure activities or human activit* in all fields           |
| 3  | or  | activit* of daily living or adl* in all fields               |
| 4  | or  | leisure activit* or free living activit* in all fields       |
| 5  | or  | exercise or walking in all fields                            |
| 6  | or  | physical activit* or physical exercise in all fields         |
| 7  | or  | walk* or lifestyle* in all fields                            |
| 8  | or  | sedentary lifestyle* or sedentary behav*r* in all fields     |
| 9  | or  | lying or sitting in all fields                               |
| 10 | or  | sleep or sleep duration in all fields                        |
| 11 | or  | sleep quality or occupation in all fields                    |
| 12 | or  | employment or paid work in all fields                        |
| 13 | or  | housework or housekeeping in all fields                      |
| 14 | or  | chores or television in all fields                           |
| 15 | or  | computer* or play* in all fields                             |
| 16 | or  | video games or screen time in all fields                     |
| 17 | or  | television view* or television watch* in all fields          |
| 18 | or  | use of time or behavi*r in all fields                        |
| 19 | or  | interpersonal relations or behavi*ral profiles in all fields |
| 20 | or  | time use or time factors in all fields                       |
| 21 | or  | social interact* or social behavi*r in all fields            |
| 22 | and | COPD or chronic obstructive pulmonary disease in all fields  |

**Table OS1.4:** Search strategy – SAGE Journals

|    |     |                                        |
|----|-----|----------------------------------------|
| 1  |     | human activities                       |
| 2  | or  | activities of daily living             |
| 3  | or  | leisure activities                     |
| 4  | or  | human activit*                         |
| 5  | or  | activit* of daily living               |
| 6  | or  | adl*                                   |
| 7  | or  | leisure activit*                       |
| 8  | or  | free living activit*                   |
| 9  | or  | exercise                               |
| 10 | or  | walking                                |
| 11 | or  | physical activit*                      |
| 12 | or  | physical exercise                      |
| 13 | or  | walk*                                  |
| 14 | or  | lifestyle*                             |
| 15 | or  | sedentary lifestyle*                   |
| 16 | or  | sedentary behav*r*                     |
| 17 | or  | lying                                  |
| 18 | or  | sitting                                |
| 19 | or  | sleep                                  |
| 20 | or  | sleep duration                         |
| 21 | or  | sleep quality                          |
| 22 | or  | occupation                             |
| 23 | or  | employment                             |
| 24 | or  | paid work                              |
| 25 | or  | housework                              |
| 26 | or  | housekeeping                           |
| 27 | or  | chores                                 |
| 28 | or  | television                             |
| 29 | or  | computer*                              |
| 30 | or  | play*                                  |
| 31 | or  | video games                            |
| 32 | or  | screen time                            |
| 33 | or  | television view*                       |
| 34 | or  | television watch*                      |
| 35 | or  | use of time                            |
| 36 | or  | behavi*r                               |
| 37 | or  | interpersonal relations                |
| 38 | or  | behavi*ral profiles                    |
| 39 | or  | time use                               |
| 40 | or  | time factors                           |
| 41 | or  | social interact*                       |
| 42 | or  | socal behavi*r                         |
| 43 | and | COPD                                   |
| 44 | or  | chronic obstructive pulmonary disease. |

**Table OS1.5:** Search strategy – Science Direct

SCOPUS

|    |     |                                        |
|----|-----|----------------------------------------|
| 1  |     | human activities                       |
| 2  | or  | activities of daily living             |
| 3  | or  | leisure activities                     |
| 4  | or  | human activit*                         |
| 5  | or  | activit* of daily living               |
| 6  | or  | adl*                                   |
| 7  | or  | leisure activit*                       |
| 8  | or  | free living activit*                   |
| 9  | or  | exercise                               |
| 10 | or  | walking                                |
| 11 | or  | physical activit*                      |
| 12 | or  | physical exercise                      |
| 13 | or  | walk*                                  |
| 14 | or  | lifestyle*                             |
| 15 | or  | sedentary lifestyle*                   |
| 16 | or  | sedentary behav*r*                     |
| 17 | or  | lying                                  |
| 18 | or  | sitting                                |
| 19 | or  | sleep                                  |
| 20 | or  | sleep duration                         |
| 21 | or  | sleep quality                          |
| 22 | or  | occupation                             |
| 23 | or  | employment                             |
| 24 | or  | paid work                              |
| 25 | or  | housework                              |
| 26 | or  | housekeeping                           |
| 27 | or  | chores                                 |
| 28 | or  | television                             |
| 29 | or  | computer*                              |
| 30 | or  | play*                                  |
| 31 | or  | video games                            |
| 32 | or  | screen time                            |
| 33 | or  | television view*                       |
| 34 | or  | television watch*                      |
| 35 | or  | use of time                            |
| 36 | or  | behavi*r                               |
| 37 | or  | interpersonal relations                |
| 38 | or  | behavi*ral profiles                    |
| 39 | or  | time use                               |
| 40 | or  | time factors                           |
| 41 | or  | social interact*                       |
| 42 | or  | socal behavi*r                         |
| 43 | and | COPD                                   |
| 44 | or  | chronic obstructive pulmonary disease. |

**Table OS1.6:** Search strategy – Scopus



**Online supplement – MARCA activity hierarchy**

| superdomain | macrodomain         | mesodomain         | MET.min | activity                                                                   |
|-------------|---------------------|--------------------|---------|----------------------------------------------------------------------------|
| sleep       | sleep               | sleep              | 0.9     | sleeping                                                                   |
| screen time | active screen time  | active videogames  | 1.7     | playing active video games (eg EyeToy/dance mat/arcade/Wii games) - light  |
| screen time | active screen time  | active videogames  | 3.4     | playing active video games (eg EyeToy/dance mat/arcade/Wii games) - medium |
| screen time | active screen time  | active videogames  | 6.4     | playing active video games (eg EyeToy/dance mat/arcade/Wii games) - hard   |
| screen time | passive screen time | passive videogames | 1.5     | computer/console games (eg playstation/xbox/handheld)                      |
| screen time | passive screen time | TV                 | 1.0     | watching TV - lying quietly                                                |
| screen time | passive screen time | TV                 | 1.0     | watching TV - sitting                                                      |
| quiet time  | non-reading         | lie awake          | 1.0     | lying awake                                                                |
| quiet time  | non-reading         | listen to music    | 1.0     | listening to music/radio - lying                                           |
| quiet time  | non-reading         | listen to music    | 1.3     | listening to music/radio - sitting                                         |
| quiet time  | non-reading         | quiet time nec     | 1.0     | sitting in a spa                                                           |
| quiet time  | non-reading         | sit                | 1.0     | sitting quietly                                                            |
| quiet time  | non-reading         | sit                | 1.0     | meditating                                                                 |
| quiet time  | non-reading         | spiritual          | 1.0     | praying                                                                    |
| quiet time  | non-reading         | spiritual          | 1.5     | sitting in church                                                          |
| quiet time  | reading             | reading            | 1.0     | reading - lying down                                                       |
| quiet time  | reading             | reading            | 1.3     | reading - sitting                                                          |
| quiet time  | reading             | reading            | 1.8     | reading - standing                                                         |
| social      | communication       | phone/SMS          | 1.0     | talking on phone - lying down                                              |
| social      | communication       | phone/SMS          | 1.2     | sending text messages (SMS) - lying down                                   |
| social      | communication       | phone/SMS          | 1.5     | talking on phone - sitting                                                 |
| social      | communication       | phone/SMS          | 1.5     | sending text messages (SMS) - sitting                                      |
| social      | communication       | phone/SMS          | 1.8     | talking on phone - standing                                                |
| social      | communication       | phone/SMS          | 1.8     | sending text messages (SMS) - standing                                     |
| social      | communication       | talk               | 1.8     | standing - talking                                                         |
| social      | communication       | talk               | 1.5     | sitting - talking                                                          |
| social      | communication       | talk               | 1.5     | family get-togethers (eat talk sit relax)                                  |
| social      | cultural            | art                | 1.0     | drawing - lying down                                                       |
| social      | cultural            | art                | 1.5     | arts and crafts - sitting                                                  |
| social      | cultural            | art                | 1.8     | arts and craft - standing                                                  |
| social      | cultural            | art                | 1.8     | drawing - sitting                                                          |
| social      | cultural            | art                | 2.3     | drawing - standing                                                         |
| social      | cultural            | music              | 3.0     | playing the guitar - standing                                              |

|        |                  |                  |     |                                              |
|--------|------------------|------------------|-----|----------------------------------------------|
| social | cultural         | music            | 3.5 | playing the trombone                         |
| social | cultural         | music            | 2.5 | playing the trumpet                          |
| social | cultural         | music            | 1.8 | playing the accordion                        |
| social | cultural         | music            | 2.0 | playing the cello                            |
| social | cultural         | music            | 4.0 | playing the drums                            |
| social | cultural         | music            | 2.0 | playing the flute/recorder - sitting         |
| social | cultural         | music            | 2.0 | playing the guitar - sitting                 |
| social | cultural         | music            | 2.0 | playing the horn                             |
| social | cultural         | music            | 2.5 | playing the piano or organ                   |
| social | cultural         | music            | 2.5 | playing the violin                           |
| social | cultural         | music            | 2.0 | playing woodwind instruments                 |
| social | cultural         | music            | 1.5 | singing - sitting                            |
| social | cultural         | music            | 2.0 | singing - standing                           |
| social | Maori activities | Maori activities | 7.1 | Maori activities - Haka                      |
| social | Maori activities | Maori activities | 8.5 | Maori activities - Haka Powhiri (male)       |
| social | Maori activities | Maori activities | 6.5 | Maori activities - Haka Tutungurahu (male)   |
| social | Maori activities | Maori activities | 6.2 | Maori activities - Kapahaka (male)           |
| social | Maori activities | Maori activities | 5.0 | Maori activities - Moteatea (male)           |
| social | Maori activities | Maori activities | 7.1 | Maori activities - Taiaha (male)             |
| social | Maori activities | Maori activities | 5.9 | Maori activities - Waiata-a-ringa (male)     |
| social | Maori activities | Maori activities | 5.4 | Maori activities - Waiata Tira (male)        |
| social | Maori activities | Maori activities | 6.3 | Maori activities - Whakaeke (male)           |
| social | Maori activities | Maori activities | 4.6 | Maori activities - Poi                       |
| social | Maori activities | Maori activities | 5.3 | Maori activities - Haka Powhiri (female)     |
| social | Maori activities | Maori activities | 2.7 | Maori activities - Haka Tutungurahu (female) |
| social | Maori activities | Maori activities | 3.9 | Maori activities - Kapahaka (female)         |
| social | Maori activities | Maori activities | 3.9 | Maori activities - Moteatea (female)         |
| social | Maori activities | Maori activities | 5.0 | Maori activities - Taiaha (female)           |
| social | Maori activities | Maori activities | 4.0 | Maori activities - Waiata-a-ringa (female)   |
| social | Maori activities | Maori activities | 3.7 | Maori activities - Waiata Tira (female)      |
| social | Maori activities | Maori activities | 3.6 | Maori activities - Whakaeke (female)         |
| social | Maori activities | Maori activities | 6.7 | Maori activities - Whakawatea (male)         |
| social | Maori activities | Maori activities | 7.0 | Maori activities - Whakawhiti (male)         |
| social | Maori activities | Maori activities | 4.7 | Maori activities - Whakawatea (female)       |
| social | Maori activities | Maori activities | 3.8 | Maori activities - Whakawhiti (female)       |
| social | socialising      | party            | 1.8 | partying (mostly standing)                   |

|           |                        |                        |     |                                                           |
|-----------|------------------------|------------------------|-----|-----------------------------------------------------------|
| social    | socialising            | party                  | 3.2 | partying (mostly dancing)                                 |
| social    | socialising            | party                  | 1.5 | partying (mostly sitting)                                 |
| social    | socialising            | social nec             | 1.2 | standing quietly - eg standing in a line                  |
| social    | socialising            | social nec             | 1.0 | sitting at the movies/cinema/theatre                      |
| social    | socialising            | social nec             | 1.5 | playing cards/puzzles/board games                         |
| social    | socialising            | social nec             | 1.5 | watching live sporting events                             |
| social    | socialising            | social nec             | 1.5 | casino gambling (eg pokies/roulette/blackjack) - sitting  |
| social    | socialising            | social nec             | 2.5 | camping - sitting                                         |
| social    | socialising            | social nec             | 1.0 | kissing/hugging                                           |
| social    | socialising            | social nec             | 1.5 | sexual activity                                           |
| social    | socialising            | social nec             | 1.5 | amusement/theme park rides                                |
| social    | socialising            | social nec             | 2.3 | drama                                                     |
| social    | socialising            | social nec             | 1.8 | giving a talk/presentation                                |
| social    | socialising            | social nec             | 1.5 | wrapping/unwrapping presents                              |
| social    | socialising            | social nec             | 2.3 | casino gambling (eg pokies/roulette/blackjack) - standing |
| self-care | eating                 | eating                 | 2.0 | eating while standing                                     |
| self-care | eating                 | eating                 | 2.0 | drinking while standing                                   |
| self-care | eating                 | eating                 | 1.5 | eating - sitting                                          |
| self-care | eating                 | eating                 | 1.5 | drinking - sitting                                        |
| self-care | grooming and ablutions | grooming and ablutions | 1.0 | having hair/nails done by someone else                    |
| self-care | grooming and ablutions | grooming and ablutions | 1.5 | sitting in bath                                           |
| self-care | grooming and ablutions | grooming and ablutions | 1.0 | sitting on toilet                                         |
| self-care | grooming and ablutions | grooming and ablutions | 2.5 | brushing or combing hair (standing)                       |
| self-care | grooming and ablutions | grooming and ablutions | 2.0 | brushing teeth                                            |
| self-care | grooming and ablutions | grooming and ablutions | 2.0 | showering & towelling off                                 |
| self-care | grooming and ablutions | grooming and ablutions | 1.0 | taking medicine                                           |
| self-care | grooming and ablutions | grooming and ablutions | 2.0 | shaving                                                   |
| self-care | grooming and ablutions | grooming and ablutions | 2.0 | washing hands/face                                        |
| self-care | grooming and ablutions | grooming and ablutions | 2.0 | putting on makeup/sunscreen/contact lenses/grooming etc   |
| self-care | grooming and ablutions | grooming and ablutions | 2.0 | dressing & undressing                                     |
| self-care | grooming and ablutions | grooming and ablutions | 2.0 | getting ready for bed                                     |
| work      | computer               | computer               | 1.8 | computer work (eg typing/internet)                        |
| work      | employment             | blue collar            | 5.5 | construction work outside                                 |
| work      | employment             | blue collar            | 6.0 | using heavy power tools (eg pneumatic drill/jackhammer)   |
| work      | employment             | blue collar            | 7.0 | masonry - building with bricks                            |
| work      | employment             | blue collar            | 4.5 | carpentry - light                                         |

|      |            |                   |      |                                                                 |
|------|------------|-------------------|------|-----------------------------------------------------------------|
| work | employment | blue collar       | 6.0  | carpentry - medium                                              |
| work | employment | blue collar       | 7.5  | carpentry - hard                                                |
| work | employment | blue collar       | 6.0  | roofing                                                         |
| work | employment | blue collar       | 3.5  | wiring/plumbing                                                 |
| work | employment | blue collar       | 4.5  | sanding floors with power sander                                |
| work | employment | blue collar       | 3.0  | buffing the floor                                               |
| work | employment | blue collar       | 6.5  | coal mining (eg drilling coal/rock/erecting supports)           |
| work | employment | blue collar       | 7.0  | coal mining (eg shoveling coal)                                 |
| work | employment | blue collar       | 2.5  | operating heavy duty equipment (not driving)                    |
| work | employment | blue collar       | 3.0  | assembly line work                                              |
| work | employment | blue collar       | 5.3  | steel mill - fettling/forging/tipping moulds                    |
| work | employment | blue collar       | 7.9  | steel mill - tending furnace/hand rolling/merchant mill rolling |
| work | employment | blue collar       | 11.0 | steel mill - removing slag                                      |
| work | employment | blue collar       | 6.5  | loading/unloading truck                                         |
| work | employment | blue collar       | 3.0  | machinery fitter                                                |
| work | employment | blue collar       | 3.0  | toolmaker                                                       |
| work | employment | blue collar       | 4.0  | fixing the car - body work                                      |
| work | employment | blue collar       | 3.0  | fixing the car - general                                        |
| work | employment | other occupations | 2.5  | policing - directing traffic - standing                         |
| work | employment | other occupations | 4.0  | policing - making an arrest - standing                          |
| work | employment | other occupations | 11.0 | fire fighting - climbing ladder with full gear                  |
| work | employment | other occupations | 8.0  | fire fighting - hauling hoses on the ground                     |
| work | employment | other occupations | 3.0  | nursing - patient care                                          |
| work | employment | other occupations | 3.0  | setting up chairs/light furniture for an event                  |
| work | employment | other occupations | 4.0  | masseuse - giving massages - standing                           |
| work | employment | other occupations | 2.2  | postman                                                         |
| work | employment | other occupations | 4.1  | garbage collector                                               |
| work | employment | other occupations | 8.0  | climbing ladder                                                 |
| work | employment | other occupations | 1.5  | lab work - sitting                                              |
| work | employment | other occupations | 3.5  | locksmith                                                       |
| work | employment | primary           | 3.0  | farming - milking by hand                                       |
| work | employment | primary           | 2.5  | mowing lawn with ride on mower                                  |
| work | employment | primary           | 6.0  | horse grooming                                                  |
| work | employment | primary           | 6.0  | butchering animals                                              |
| work | employment | primary           | 4.3  | farming - tending to cattle (eg feeding/hauling water)          |
| work | employment | primary           | 6.0  | digging ditches - light                                         |

|           |                  |              |      |                                                                |
|-----------|------------------|--------------|------|----------------------------------------------------------------|
| work      | employment       | primary      | 7.0  | digging ditches - medium                                       |
| work      | employment       | primary      | 9.0  | digging ditches - hard                                         |
| work      | employment       | primary      | 4.3  | forestry - weeding/using a power saw                           |
| work      | employment       | primary      | 5.4  | forestry - hoeing/slow axe chopping/planting by hand)          |
| work      | employment       | primary      | 7.0  | forestry - sawing by hand/barking trees/stacking               |
| work      | employment       | primary      | 8.0  | forestry - felling trees                                       |
| work      | employment       | primary      | 9.0  | forestry - trimming trees                                      |
| work      | employment       | primary      | 17.0 | forestry - axe chopping (fast)                                 |
| work      | employment       | primary      | 1.5  | farming - milking with a machine                               |
| work      | employment       | primary      | 5.5  | farming - shovelling grain                                     |
| work      | employment       | primary      | 6.0  | farming - grooming/brushing/shearing farm animals              |
| work      | employment       | primary      | 8.0  | farming - forking straw/baling hay/cleaning barn               |
| work      | employment       | white collar | 2.3  | using a photocopier - standing                                 |
| work      | employment       | white collar | 1.5  | office work - sitting (eg filing/stapling/organisng documents) |
| work      | employment       | white collar | 1.5  | sitting in a meeting                                           |
| work      | employment       | white collar | 2.3  | filing - standing                                              |
| work      | employment       | white collar | 2.3  | checkout/fast food operator                                    |
| work      | employment       | white collar | 3.0  | stacking shelves                                               |
| work      | employment       | white collar | 3.0  | waitressing                                                    |
| work      | employment       | white collar | 2.2  | librarian                                                      |
| work      | employment       | white collar | 3.5  | petrol station attendant                                       |
| work      | employment       | white collar | 2.3  | bartending                                                     |
| work      | employment       | white collar | 3.3  | bakery work                                                    |
| work      | employment       | white collar | 2.3  | tailoring - cutting/hand sewing/machine sewing                 |
| work      | employment       | white collar | 2.0  | ushering                                                       |
| work      | employment       | white collar | 3.0  | door to door sales/delivery - long periods of walking          |
| work      | employment       | white collar | 1.5  | teaching - sitting and talking                                 |
| work      | employment       | white collar | 6.5  | teaching PE (participating in class)                           |
| work      | employment       | white collar | 4.0  | teaching PE (not participating in class)                       |
| work      | employment       | white collar | 2.3  | teaching - standing and talking                                |
| work      | study            | study        | 1.8  | studying/homework                                              |
| work      | study            | study        | 1.8  | taking notes/class discussion                                  |
| work      | study            | study        | 1.8  | writing - sitting                                              |
| work      | study            | study        | 2.3  | writing - standing                                             |
| work      | study            | study        | 1.0  | writing - lying down                                           |
| transport | active transport | cycling      | 6.0  | riding a bicycle/bike - light                                  |

|           |                   |                 |      |                                          |
|-----------|-------------------|-----------------|------|------------------------------------------|
| transport | active transport  | cycling         | 8.0  | riding a bicycle/bike - medium           |
| transport | active transport  | cycling         | 10.0 | riding a bicycle/bike - hard             |
| transport | active transport  | new locomotions | 3.3  | riding a scooter - light                 |
| transport | active transport  | new locomotions | 4.4  | riding a scooter - medium                |
| transport | active transport  | new locomotions | 5.5  | riding a scooter - hard                  |
| transport | active transport  | new locomotions | 3.8  | riding a skateboard - light              |
| transport | active transport  | new locomotions | 5.0  | riding a skateboard - medium             |
| transport | active transport  | new locomotions | 6.3  | riding a skateboard - hard               |
| transport | active transport  | new locomotions | 9.4  | rollerblading (in-line skating) - light  |
| transport | active transport  | new locomotions | 12.5 | rollerblading (in-line skating) - medium |
| transport | active transport  | new locomotions | 15.6 | rollerblading (in-line skating) - hard   |
| transport | active transport  | new locomotions | 5.3  | rollerskating - light                    |
| transport | active transport  | new locomotions | 7.0  | rollerskating - medium                   |
| transport | active transport  | new locomotions | 8.8  | rollerskating - hard                     |
| transport | active transport  | walking         | 3.0  | walking - light                          |
| transport | active transport  | walking         | 3.8  | walking - medium                         |
| transport | active transport  | walking         | 5.0  | walking - hard                           |
| transport | active transport  | walking         | 5.0  | climbing stairs - light                  |
| transport | active transport  | walking         | 6.0  | climbing stairs - medium                 |
| transport | active transport  | walking         | 8.0  | climbing stairs - hard                   |
| transport | active transport  | walking         | 4.5  | walking carrying a load - light          |
| transport | active transport  | walking         | 5.0  | walking carrying a load - medium         |
| transport | active transport  | walking         | 6.5  | walking carrying a load - hard           |
| transport | active transport  | walking         | 5.0  | walking using crutches                   |
| transport | active transport  | walking         | 1.9  | walking - pushing a pram - light         |
| transport | active transport  | walking         | 2.5  | walking - pushing a pram - medium        |
| transport | active transport  | walking         | 3.2  | walking - pushing a pram - hard          |
| transport | active transport  | walking         | 3.0  | walking - pushing a wheelchair - light   |
| transport | active transport  | walking         | 4.0  | walking - pushing a wheelchair - medium  |
| transport | active transport  | walking         | 5.0  | walking - pushing a wheelchair - hard    |
| transport | passive transport | driving         | 2.0  | driving a car/light truck/bus            |
| transport | passive transport | driving         | 3.0  | driving a heavy truck (eg semi trailer)  |
| transport | passive transport | driving         | 2.5  | riding a motorcycle or motor scooter     |
| transport | passive transport | driving         | 3.5  | snowmobiling                             |
| transport | passive transport | driving         | 2.5  | driving a tractor/harvester              |
| transport | passive transport | riding          | 1.0  | riding in a car/truck                    |

|           |                   |                   |     |                                                            |
|-----------|-------------------|-------------------|-----|------------------------------------------------------------|
| transport | passive transport | riding            | 1.0 | riding in a train/tram/ferry                               |
| transport | passive transport | riding            | 1.0 | riding in a bus                                            |
| transport | passive transport | riding            | 1.0 | riding in a plane                                          |
| chores    | inside chores     | child care        | 2.5 | child care - sitting (eg feeding/bathing)                  |
| chores    | inside chores     | child care        | 3.0 | child care - standing (eg carrying/dressing/playing)       |
| chores    | inside chores     | child care        | 2.0 | breast feeding                                             |
| chores    | inside chores     | child care        | 3.0 | carrying small children                                    |
| chores    | inside chores     | child care        | 2.8 | playing with young children - light                        |
| chores    | inside chores     | child care        | 4.0 | playing with young children - medium                       |
| chores    | inside chores     | child care        | 5.0 | playing with young children - hard                         |
| chores    | inside chores     | cleaning house    | 2.5 | dusting                                                    |
| chores    | inside chores     | cleaning house    | 3.5 | mopping                                                    |
| chores    | inside chores     | cleaning house    | 2.3 | putting away clothes                                       |
| chores    | inside chores     | cleaning house    | 3.8 | scrubbing floors in bathroom or bathtub                    |
| chores    | inside chores     | cleaning house    | 3.3 | sweeping floor                                             |
| chores    | inside chores     | cleaning house    | 3.0 | tidying/cleaning room                                      |
| chores    | inside chores     | cleaning house    | 3.5 | vacuuming                                                  |
| chores    | inside chores     | cleaning house    | 2.0 | making the bed                                             |
| chores    | inside chores     | cleaning house    | 2.5 | cleaning the bathroom/toilet                               |
| chores    | inside chores     | cleaning house    | 3.0 | taking out the rubbish/garbage bin                         |
| chores    | inside chores     | food preparation  | 2.5 | serving food                                               |
| chores    | inside chores     | food preparation  | 2.5 | setting the table                                          |
| chores    | inside chores     | food preparation  | 2.0 | cooking - standing                                         |
| chores    | inside chores     | food preparation  | 2.3 | washing or clearing dishes                                 |
| chores    | inside chores     | food preparation  | 2.0 | making recess or lunch                                     |
| chores    | inside chores     | inside chores nec | 2.5 | fixing things up (eg bike/toys/mechanical work on car etc) |
| chores    | inside chores     | inside chores nec | 3.0 | getting ready to leave (eg close windows/shut/lock doors)  |
| chores    | inside chores     | inside chores nec | 3.0 | loading/unloading car                                      |
| chores    | inside chores     | inside chores nec | 3.5 | unpacking boxes                                            |
| chores    | inside chores     | inside chores nec | 3.5 | bathing dog                                                |
| chores    | inside chores     | inside chores nec | 2.5 | building a fire in a fireplace                             |
| chores    | inside chores     | inside chores nec | 4.5 | painting - inside the house                                |
| chores    | inside chores     | inside chores nec | 2.3 | putting up the christmas tree                              |
| chores    | inside chores     | inside chores nec | 3.4 | sewing with machine                                        |
| chores    | inside chores     | inside chores nec | 1.5 | knitting or sewing                                         |
| chores    | inside chores     | inside chores nec | 6.0 | carrying very heavy items (eg moving furniture)            |

|                   |                |                   |     |                                                                          |
|-------------------|----------------|-------------------|-----|--------------------------------------------------------------------------|
| chores            | inside chores  | inside chores nec | 2.5 | feeding or caring for pets/farm animals (eg brushing)                    |
| chores            | inside chores  | inside chores nec | 2.5 | packing/unpacking bag                                                    |
| chores            | inside chores  | laundry           | 2.0 | hanging out washing                                                      |
| chores            | inside chores  | laundry           | 2.0 | doing the laundry                                                        |
| chores            | inside chores  | laundry           | 2.3 | ironing                                                                  |
| chores            | inside chores  | shopping-related  | 2.5 | putting away or carrying groceries                                       |
| chores            | inside chores  | shopping-related  | 2.3 | shopping                                                                 |
| chores            | outside chores | garden            | 5.5 | mowing lawn                                                              |
| chores            | outside chores | garden            | 5.0 | wheelbarrowing                                                           |
| chores            | outside chores | garden            | 4.3 | raking leaves                                                            |
| chores            | outside chores | garden            | 4.0 | gardening                                                                |
| chores            | outside chores | garden            | 2.5 | fertilising/seeding/watering lawn                                        |
| chores            | outside chores | garden            | 3.0 | picking flowers fruit or vegetables                                      |
| chores            | outside chores | garden            | 3.5 | using garden power tools (eg power cutter/leaf blower/edger/snow blower) |
| chores            | outside chores | garden            | 5.0 | shoveling/digging                                                        |
| chores            | outside chores | garden            | 4.5 | pulling up weeds                                                         |
| chores            | outside chores | garden            | 2.5 | watering plants                                                          |
| chores            | outside chores | non-garden        | 5.0 | carrying/loading/stacking wood                                           |
| chores            | outside chores | non-garden        | 6.0 | chopping wood                                                            |
| chores            | outside chores | non-garden        | 6.0 | using a chainsaw                                                         |
| chores            | outside chores | non-garden        | 5.0 | cleaning the gutters                                                     |
| chores            | outside chores | non-garden        | 6.0 | shovelling snow                                                          |
| chores            | outside chores | non-garden        | 5.0 | painting - outside the house                                             |
| chores            | outside chores | non-garden        | 4.0 | carrying sports equipment                                                |
| chores            | outside chores | non-garden        | 2.5 | filling car with petrol/gas                                              |
| chores            | outside chores | non-garden        | 3.0 | washing car or windows                                                   |
| chores            | outside chores | non-garden        | 4.0 | sweeping outside                                                         |
| physical activity | play           | animals           | 2.5 | playing with animals - sitting                                           |
| physical activity | play           | animals           | 2.8 | playing with animals - walk/run - light                                  |
| physical activity | play           | animals           | 4.0 | playing with animals - walk/run - medium                                 |
| physical activity | play           | animals           | 5.0 | playing with animals - walk/run - hard                                   |
| physical activity | play           | games             | 3.0 | quoits                                                                   |
| physical activity | play           | games             | 3.8 | totem tennis - light                                                     |
| physical activity | play           | games             | 5.0 | totem tennis - medium                                                    |
| physical activity | play           | games             | 6.3 | totem tennis - hard                                                      |
| physical activity | play           | games             | 3.0 | hacky sack - light                                                       |



|                   |       |       |      |                                  |
|-------------------|-------|-------|------|----------------------------------|
| physical activity | play  | games | 4.0  | hacky sack - medium              |
| physical activity | play  | games | 5.0  | hacky sack - hard                |
| physical activity | play  | games | 1.9  | playing catch - light            |
| physical activity | play  | games | 2.5  | playing catch - medium           |
| physical activity | play  | games | 3.2  | playing catch - hard             |
| physical activity | play  | games | 3.0  | mini golf or putt putt           |
| physical activity | play  | games | 4.5  | paddleball - light               |
| physical activity | play  | games | 6.0  | paddleball - medium              |
| physical activity | play  | games | 7.5  | paddleball - hard                |
| physical activity | play  | games | 2.3  | frisbee (general) - light        |
| physical activity | play  | games | 3.0  | frisbee (general) - medium       |
| physical activity | play  | games | 3.8  | frisbee (general) - hard         |
| physical activity | play  | games | 6.0  | frisbee (ultimate) - light       |
| physical activity | play  | games | 8.0  | frisbee (ultimate) - medium      |
| physical activity | play  | games | 10.0 | frisbee (ultimate) - hard        |
| physical activity | play  | games | 2.5  | pool/billiards/snooker           |
| physical activity | play  | games | 3.0  | table tennis - light             |
| physical activity | play  | games | 4.0  | table tennis - medium            |
| physical activity | play  | games | 5.0  | table tennis - hard              |
| physical activity | play  | games | 3.0  | tenpin bowling                   |
| physical activity | play  | games | 4.0  | juggling                         |
| physical activity | play  | games | 2.5  | darts                            |
| physical activity | sport | dance | 4.9  | dancing (general) - light        |
| physical activity | sport | dance | 6.5  | dancing (general) - medium       |
| physical activity | sport | dance | 8.1  | dancing (general) - hard         |
| physical activity | sport | dance | 3.6  | ballet - light                   |
| physical activity | sport | dance | 4.8  | ballet - medium                  |
| physical activity | sport | dance | 6.0  | ballet - hard                    |
| physical activity | sport | dance | 3.6  | tap/jazz dancing - light         |
| physical activity | sport | dance | 4.8  | tap/jazz dancing - medium        |
| physical activity | sport | dance | 6.0  | tap/jazz dancing - hard          |
| physical activity | sport | gym   | 3.0  | lifting weights - light          |
| physical activity | sport | gym   | 4.0  | lifting weights - medium         |
| physical activity | sport | gym   | 5.0  | lifting weights - hard           |
| physical activity | sport | gym   | 3.5  | gym - stationary rowing - light  |
| physical activity | sport | gym   | 7.0  | gym - stationary rowing - medium |

|                   |       |     |      |                                               |
|-------------------|-------|-----|------|-----------------------------------------------|
| physical activity | sport | gym | 8.5  | gym - stationary rowing - hard                |
| physical activity | sport | gym | 3.8  | gym - elliptical trainer - light              |
| physical activity | sport | gym | 5.1  | gym - elliptical trainer - medium             |
| physical activity | sport | gym | 6.4  | gym - elliptical trainer - hard               |
| physical activity | sport | gym | 2.0  | fitball exercises - light                     |
| physical activity | sport | gym | 2.7  | fitball exercises - medium                    |
| physical activity | sport | gym | 3.4  | fitball exercises - hard                      |
| physical activity | sport | gym | 5.5  | gym - stationary cycling/bike - light         |
| physical activity | sport | gym | 7.0  | gym - stationary cycling/bike - medium        |
| physical activity | sport | gym | 8.8  | gym - stationary cycling/bike - hard          |
| physical activity | sport | gym | 4.8  | gym - push ups/sit ups/pull ups etc - light   |
| physical activity | sport | gym | 6.4  | gym - push ups/sit ups/pull ups etc - medium  |
| physical activity | sport | gym | 8.0  | gym - push ups/sit ups/pull ups etc - hard    |
| physical activity | sport | gym | 8.0  | gym - circuit training with minimal rest      |
| physical activity | sport | gym | 5.3  | gym - ski machine - light                     |
| physical activity | sport | gym | 7.0  | gym - ski machine - medium                    |
| physical activity | sport | gym | 8.8  | gym - ski machine - hard                      |
| physical activity | sport | gym | 6.8  | gym - stair machine - light                   |
| physical activity | sport | gym | 9.0  | gym - stair machine - medium                  |
| physical activity | sport | gym | 11.3 | gym - stair machine - hard                    |
| physical activity | sport | gym | 8.0  | skipping/jump rope - light                    |
| physical activity | sport | gym | 10.0 | skipping/jump rope - medium                   |
| physical activity | sport | gym | 12.0 | skipping/jump rope - hard                     |
| physical activity | sport | gym | 5.0  | aerobics/health hustle - light                |
| physical activity | sport | gym | 7.0  | aerobics/health hustle - medium               |
| physical activity | sport | gym | 8.5  | aerobics/health hustle - hard                 |
| physical activity | sport | gym | 3.5  | light home exercises (eg back exercises)      |
| physical activity | sport | gym | 2.5  | stretching exercises                          |
| physical activity | sport | gym | 2.5  | tai chi/yoga                                  |
| physical activity | sport | gym | 3.0  | gymnastics - light                            |
| physical activity | sport | gym | 4.0  | gymnastics - medium                           |
| physical activity | sport | gym | 5.0  | gymnastics - hard                             |
| physical activity | sport | gym | 7.5  | karate/martial arts/judo/kick boxing - light  |
| physical activity | sport | gym | 10.0 | karate/martial arts/judo/kick boxing - medium |
| physical activity | sport | gym | 12.5 | karate/martial arts/judo/kick boxing - hard   |
| physical activity | sport | gym | 4.5  | using a punching bag - light                  |

|                   |       |                      |      |                               |
|-------------------|-------|----------------------|------|-------------------------------|
| physical activity | sport | gym                  | 6.0  | using a punching bag - medium |
| physical activity | sport | gym                  | 7.5  | using a punching bag - hard   |
| physical activity | sport | miscellaneous sports | 6.0  | rockclimbing - light          |
| physical activity | sport | miscellaneous sports | 8.0  | rockclimbing - medium         |
| physical activity | sport | miscellaneous sports | 11.0 | rockclimbing - hard           |
| physical activity | sport | miscellaneous sports | 3.5  | archery                       |
| physical activity | sport | miscellaneous sports | 3.0  | horseback riding - light      |
| physical activity | sport | miscellaneous sports | 4.0  | horseback riding - medium     |
| physical activity | sport | miscellaneous sports | 5.0  | horseback riding - hard       |
| physical activity | sport | miscellaneous sports | 8.0  | horse racing - galloping      |
| physical activity | sport | miscellaneous sports | 6.5  | horse racing - trotting       |
| physical activity | sport | miscellaneous sports | 2.6  | horse racing - walking        |
| physical activity | sport | miscellaneous sports | 3.4  | golf - light                  |
| physical activity | sport | miscellaneous sports | 4.5  | golf - medium                 |
| physical activity | sport | miscellaneous sports | 5.6  | golf - hard                   |
| physical activity | sport | partner sports       | 5.3  | racquetball - light           |
| physical activity | sport | partner sports       | 7.0  | racquetball - medium          |
| physical activity | sport | partner sports       | 8.8  | racquetball - hard            |
| physical activity | sport | partner sports       | 9.0  | squash - light                |
| physical activity | sport | partner sports       | 12.0 | squash - medium               |
| physical activity | sport | partner sports       | 15.0 | squash - hard                 |
| physical activity | sport | partner sports       | 5.3  | tennis (court) - light        |
| physical activity | sport | partner sports       | 7.0  | tennis (court) - medium       |
| physical activity | sport | partner sports       | 8.8  | tennis (court) - hard         |
| physical activity | sport | partner sports       | 3.4  | badminton - light             |
| physical activity | sport | partner sports       | 4.5  | badminton - medium            |
| physical activity | sport | partner sports       | 5.6  | badminton - hard              |
| physical activity | sport | partner sports       | 2.5  | croquet                       |
| physical activity | sport | snow sports          | 4.0  | snowboarding - light          |
| physical activity | sport | snow sports          | 5.3  | snowboarding - medium         |
| physical activity | sport | snow sports          | 6.6  | snowboarding - hard           |
| physical activity | sport | snow sports          | 6.4  | snowshoeing - light           |
| physical activity | sport | snow sports          | 8.5  | snowshoeing - medium          |
| physical activity | sport | snow sports          | 10.6 | snowshoeing - hard            |
| physical activity | sport | snow sports          | 5.5  | ice skating - light           |
| physical activity | sport | snow sports          | 7.0  | ice skating - medium          |

|                   |       |             |      |                                                |
|-------------------|-------|-------------|------|------------------------------------------------|
| physical activity | sport | snow sports | 9.0  | ice skating - hard                             |
| physical activity | sport | snow sports | 7.0  | skiing (cross-country) - light                 |
| physical activity | sport | snow sports | 8.0  | skiing (cross-country) - medium                |
| physical activity | sport | snow sports | 9.0  | skiing (cross-country) - hard                  |
| physical activity | sport | snow sports | 5.0  | skiing (downhill) - light                      |
| physical activity | sport | snow sports | 6.0  | skiing (downhill) - medium                     |
| physical activity | sport | snow sports | 8.0  | skiing (downhill) - hard                       |
| physical activity | sport | snow sports | 7.0  | speed skating (competitive) - light            |
| physical activity | sport | snow sports | 9.0  | speed skating (competitive) - medium           |
| physical activity | sport | snow sports | 15.0 | speed skating (competitive) - hard             |
| physical activity | sport | snow sports | 5.3  | bobsled toboggan luge - light                  |
| physical activity | sport | snow sports | 7.0  | bobsled toboggan luge - medium                 |
| physical activity | sport | snow sports | 8.8  | bobsled toboggan luge - hard                   |
| physical activity | sport | snow sports | 3.0  | curling - light                                |
| physical activity | sport | snow sports | 4.0  | curling - medium                               |
| physical activity | sport | snow sports | 5.0  | curling - hard                                 |
| physical activity | sport | snow sports | 6.0  | hockey (ice) - light                           |
| physical activity | sport | snow sports | 8.0  | hockey (ice) - medium                          |
| physical activity | sport | snow sports | 10.0 | hockey (ice) - hard                            |
| physical activity | sport | team sports | 3.8  | baseball - light                               |
| physical activity | sport | team sports | 5.0  | baseball - medium                              |
| physical activity | sport | team sports | 6.3  | baseball - hard                                |
| physical activity | sport | team sports | 6.0  | basketball - light                             |
| physical activity | sport | team sports | 8.0  | basketball - medium                            |
| physical activity | sport | team sports | 10.0 | basketball - hard                              |
| physical activity | sport | team sports | 3.8  | cricket - light                                |
| physical activity | sport | team sports | 5.0  | cricket - medium                               |
| physical activity | sport | team sports | 6.3  | cricket - hard                                 |
| physical activity | sport | team sports | 6.0  | football (Australian/Gaelic/American) - light  |
| physical activity | sport | team sports | 8.0  | football (Australian/Gaelic/American) - medium |
| physical activity | sport | team sports | 10.0 | football (Australian/Gaelic/American) - hard   |
| physical activity | sport | team sports | 7.5  | rugby league - light                           |
| physical activity | sport | team sports | 10.0 | rugby league - medium                          |
| physical activity | sport | team sports | 12.5 | rugby league - hard                            |
| physical activity | sport | team sports | 7.5  | rugby union - light                            |
| physical activity | sport | team sports | 10.0 | rugby union - medium                           |

|                   |       |                 |      |                                                            |
|-------------------|-------|-----------------|------|------------------------------------------------------------|
| physical activity | sport | team sports     | 12.5 | rugby union - hard                                         |
| physical activity | sport | team sports     | 5.3  | soccer (field/indoor) - light                              |
| physical activity | sport | team sports     | 7.0  | soccer (field/indoor) - medium                             |
| physical activity | sport | team sports     | 8.8  | soccer (field/indoor) - hard                               |
| physical activity | sport | team sports     | 6.0  | European handball (team) - light                           |
| physical activity | sport | team sports     | 8.0  | European handball (team) - medium                          |
| physical activity | sport | team sports     | 10.0 | European handball (team) - hard                            |
| physical activity | sport | team sports     | 6.0  | hockey (field) - light                                     |
| physical activity | sport | team sports     | 8.0  | hockey (field) - medium                                    |
| physical activity | sport | team sports     | 10.0 | hockey (field) - hard                                      |
| physical activity | sport | team sports     | 6.0  | lacrosse - light                                           |
| physical activity | sport | team sports     | 8.0  | lacrosse - medium                                          |
| physical activity | sport | team sports     | 10.0 | lacrosse - hard                                            |
| physical activity | sport | team sports     | 3.0  | lawn bowls                                                 |
| physical activity | sport | team sports     | 6.0  | netball - light                                            |
| physical activity | sport | team sports     | 8.0  | netball - medium                                           |
| physical activity | sport | team sports     | 10.1 | netball - hard                                             |
| physical activity | sport | team sports     | 4.0  | coaching (eg football/soccer/basketball)                   |
| physical activity | sport | team sports     | 3.8  | softball or t-ball - light                                 |
| physical activity | sport | team sports     | 5.0  | softball or t-ball - medium                                |
| physical activity | sport | team sports     | 6.3  | softball or t-ball - hard                                  |
| physical activity | sport | team sports     | 3.0  | volleyball (court) - light                                 |
| physical activity | sport | team sports     | 4.0  | volleyball (court) - medium                                |
| physical activity | sport | team sports     | 5.0  | volleyball (court) - hard                                  |
| physical activity | sport | team sports     | 6.0  | volleyball (beach) - light                                 |
| physical activity | sport | team sports     | 8.0  | volleyball (beach) - medium                                |
| physical activity | sport | team sports     | 10.0 | volleyball (beach) - hard                                  |
| physical activity | sport | team sports     | 6.0  | touch football - light                                     |
| physical activity | sport | team sports     | 8.0  | touch football - medium                                    |
| physical activity | sport | team sports     | 10.0 | touch football - hard                                      |
| physical activity | sport | track and field | 4.5  | athletics (track and field): jumping - light               |
| physical activity | sport | track and field | 6.0  | athletics (track and field): jumping - medium              |
| physical activity | sport | track and field | 7.5  | athletics (track and field): jumping - hard                |
| physical activity | sport | track and field | 7.5  | athletics (track and field): hurdles steeplechase - light  |
| physical activity | sport | track and field | 10.0 | athletics (track and field): hurdles steeplechase - medium |
| physical activity | sport | track and field | 12.5 | athletics (track and field): hurdles steeplechase - hard   |

|                   |       |                 |      |                                                |
|-------------------|-------|-----------------|------|------------------------------------------------|
| physical activity | sport | track and field | 3.0  | athletics (track and field): throwing - light  |
| physical activity | sport | track and field | 4.0  | athletics (track and field): throwing - medium |
| physical activity | sport | track and field | 5.0  | athletics (track and field): throwing - hard   |
| physical activity | sport | track and field | 6.8  | orienteering - light                           |
| physical activity | sport | track and field | 9.0  | orienteering - medium                          |
| physical activity | sport | track and field | 11.3 | orienteering - hard                            |
| physical activity | sport | track and field | 8.0  | running/jogging - light                        |
| physical activity | sport | track and field | 10.0 | running/jogging - medium                       |
| physical activity | sport | track and field | 12.5 | running/jogging - hard                         |
| physical activity | sport | track and field | 4.9  | race walking - light                           |
| physical activity | sport | track and field | 6.5  | race walking - medium                          |
| physical activity | sport | track and field | 8.1  | race walking - hard                            |
| physical activity | sport | water sports    | 2.0  | sailboard/windsurfing - light                  |
| physical activity | sport | water sports    | 3.0  | sailboard/windsurfing - medium                 |
| physical activity | sport | water sports    | 5.0  | sailboard/windsurfing - hard                   |
| physical activity | sport | water sports    | 4.5  | water skiing - light                           |
| physical activity | sport | water sports    | 6.0  | water skiing - medium                          |
| physical activity | sport | water sports    | 7.5  | water skiing - hard                            |
| physical activity | sport | water sports    | 7.0  | jetskiing                                      |
| physical activity | sport | water sports    | 2.3  | sailing/boating - light                        |
| physical activity | sport | water sports    | 3.0  | sailing/boating - medium                       |
| physical activity | sport | water sports    | 3.8  | sailing/boating - hard                         |
| physical activity | sport | water sports    | 3.0  | rowing/canoeing - light                        |
| physical activity | sport | water sports    | 7.0  | rowing/canoeing - medium                       |
| physical activity | sport | water sports    | 12.0 | rowing/canoeing - hard                         |
| physical activity | sport | water sports    | 3.8  | kayaking - light                               |
| physical activity | sport | water sports    | 5.0  | kayaking - medium                              |
| physical activity | sport | water sports    | 6.3  | kayaking - hard                                |
| physical activity | sport | water sports    | 7.0  | skindiving (SCUBA) - light                     |
| physical activity | sport | water sports    | 12.5 | skindiving (SCUBA) - medium                    |
| physical activity | sport | water sports    | 16.0 | skindiving (SCUBA) - hard                      |
| physical activity | sport | water sports    | 3.8  | snorkeling - light                             |
| physical activity | sport | water sports    | 5.0  | snorkeling - medium                            |
| physical activity | sport | water sports    | 6.3  | snorkeling - hard                              |
| physical activity | sport | water sports    | 2.3  | surfing (body or board) - light                |
| physical activity | sport | water sports    | 3.0  | surfing (body or board) - medium               |

|                   |       |              |      |                                     |
|-------------------|-------|--------------|------|-------------------------------------|
| physical activity | sport | water sports | 3.8  | surfing (body or board) - hard      |
| physical activity | sport | water sports | 7.0  | swimming laps - light               |
| physical activity | sport | water sports | 10.0 | swimming laps - medium              |
| physical activity | sport | water sports | 11.0 | swimming laps - hard                |
| physical activity | sport | water sports | 3.8  | whitewater rafting - light          |
| physical activity | sport | water sports | 5.0  | whitewater rafting - medium         |
| physical activity | sport | water sports | 6.3  | whitewater rafting - hard           |
| physical activity | sport | water sports | 3.0  | swimming (playing in pool) - light  |
| physical activity | sport | water sports | 4.0  | swimming (playing in pool) - medium |
| physical activity | sport | water sports | 5.0  | swimming (playing in pool) - hard   |
| physical activity | sport | water sports | 3.0  | water aerobics - light              |
| physical activity | sport | water sports | 4.0  | water aerobics - medium             |
| physical activity | sport | water sports | 5.0  | water aerobics - hard               |
| physical activity | sport | water sports | 7.5  | water polo - light                  |
| physical activity | sport | water sports | 10.0 | water polo - medium                 |
| physical activity | sport | water sports | 12.5 | water polo - hard                   |
| physical activity | sport | water sports | 2.5  | fishing - sitting                   |
| physical activity | sport | water sports | 3.0  | fishing - standing                  |
| physical activity | sport | water sports | 3.0  | fishing - in the water with waders  |

**Table OS2:** MARCA activity domain hierarchy

**Online Supplement** – Full text evaluation and exclusion decisions

**Not Original Research**

| Author                          | Year | Title                                                                                                                            | Citation                                                     |
|---------------------------------|------|----------------------------------------------------------------------------------------------------------------------------------|--------------------------------------------------------------|
|                                 | 1965 | Home and clinic care of patients with chronic obstructive lung disease.                                                          | Aspen Emphysema Conference 8: 28-34.                         |
| Traver, G. A.                   | 1975 | Living with chronic respiratory disease.                                                                                         | Am J Nurs 75 (10): 1777-1781, 1794.                          |
| Callahan, M.                    | 1982 | C.O.P.D. makes a bad first impression, but you'll find wonderful people underneath.                                              | Nursing 12(5): 67-72.                                        |
|                                 | 1984 | Coping with COPD.                                                                                                                | Patient Care 18(11): 185-185.                                |
|                                 | 1984 | Exercise, diet, and COPD.                                                                                                        | Patient Care 18(20): 123.                                    |
| Branscomb, B. V. & Weems, B. P. | 1986 | Home care and COPD: patient responsibility.                                                                                      | Respir Ther 16(5): 11-13.                                    |
| Burns, M. R.                    | 1987 | Cruising with COPD.                                                                                                              | Am J Nurse 87(4): 479-482.                                   |
| Hoffman, L. A. et al.           | 1989 | Daily living with COPD. Self-help skills to improve functional ability.                                                          | Postgrad Med 86(6): 153-154.                                 |
| Brown, S. & Mann, R.            | 1990 | Breaking the cycle--control of breathlessness in chronic lung disease.                                                           | Professional nurse (London, England) 5 (6): 325-328.         |
| Bencini, S. et al.              | 1992 | Quality of life measurement in chronic obstructive pulmonary diseases: Instruments and issues.                                   | Giornale Italiano della Malattie del Torace 46 (4): 249-256. |
| Drummond, G. B.                 | 1992 | Body composition and exercise performance in patients with chronic obstructive pulmonary disease (COPD).                         | Thorax 47(1): 66.                                            |
| Garcia Rio, F. J. et al.        | 1992 | [Effects of sleep on chronic obstructive pulmonary disease].                                                                     | Med Clin (Barc) 99(5): 188-193.                              |
| Hodgkin, J. E. et al.           | 1992 | Your role in COPD home care.                                                                                                     | Patient Care 26(5): 147.                                     |
|                                 | 1992 | Blowing balloons for better breathing.                                                                                           | Hosp Pract 27 (9): 252.                                      |
|                                 | 1992 | Living with COPD: a few practical guidelines.                                                                                    | Patient Care 26(2): 59-60.                                   |
| Mitchell, F. et al.             | 1993 | [Evaluation of the quality of life in persons with COPD].                                                                        | Rev Mal Respir 10(2): 147-153.                               |
| Jones, P. W.                    | 1995 | Issues concerning health-related quality of life in COPD.                                                                        | CHEST 107(5): 187S-193.                                      |
| Yohannes, A. M. et al.          | 1997 | Predictors of functional disability in elderly patients with chronic obstructive pulmonary disease.                              | Physiother 83 (7): 353.                                      |
| Cannon, C. A. & Cavanaugh, J.C. | 1998 | Chronic illness in the context of marriage: A systems perspective of stress and coping in chronic obstructive pulmonary disease. | Fam Syst Health 16(4): 401-418.                              |



|                                   |      |                                                                                                                                                                                                             |                                                 |
|-----------------------------------|------|-------------------------------------------------------------------------------------------------------------------------------------------------------------------------------------------------------------|-------------------------------------------------|
| Carr-Lopez, S. et al.             | 1998 | Medication use in home care patients with COPD.                                                                                                                                                             | Home Care Provid 3(3): 144-148.                 |
| Epler, G. R. M., E.J.             | 1998 | Case records of the Massachusetts General Hospital. Weekly clinicopathological exercises. Case 11-1998. A 35-year-old woman with obstructive pulmonary disease and cystic changes on CT scans of the chest. | N Engl J Med 338 (15): 1051-1058.               |
| Garvey, C.                        | 1998 | COPD and exercise.                                                                                                                                                                                          | Lippincott's Prim Care Pract 2(6): 589-598.     |
|                                   | 1998 | Comparison of outcome measures for patients with chronic obstructive pulmonary disease (copd) in an outpatient setting.                                                                                     | Resp Care 43(3): 168.                           |
|                                   | 1998 | Strategies in preserving lung health and preventing COPD and associated diseases. The National Lung Health Education Program (NLHEP).                                                                       | Chest 113(2 Suppl): 123S-163S.                  |
| Asplund, R.                       | 1999 | Sleep disorders in the elderly.                                                                                                                                                                             | Drugs Aging 14(2): 91-103.                      |
| D'Urzo, A. D.                     | 1999 | Exercise limitation in chronic obstructive pulmonary disease (COPD).                                                                                                                                        | Am J Respir Crit Care Med 160(2): 756.          |
| Masa Jimenez, J. F.               | 1999 | [Respiratory sleep disorders in COPD].                                                                                                                                                                      | Archivos de Bronconeumologia 35 Suppl 3: 28-33. |
|                                   | 1999 | Rx for COPD.                                                                                                                                                                                                | J Sport Exerc Psychol 21(2): 177.               |
|                                   | 1999 | Breathing better with COPD: respiratory series, National Educational Video.                                                                                                                                 |                                                 |
| Coons, S. J. et al.               | 2000 | A comparative review of generic quality-of-life instruments.                                                                                                                                                | Pharmacoeconomics 17(1): 13-35.                 |
| Corrado, O. J.                    | 2000 | Caring for older hospital-at-home patients.                                                                                                                                                                 | Age Ageing 29 (2): 97-98.                       |
|                                   | 2000 | Overcoming shortness of breath.                                                                                                                                                                             | Nursing 30 (8): 20.                             |
|                                   | 2000 | Exercise for COPD.                                                                                                                                                                                          | Health news (Waltham, Mass.) 6 (11): 8.         |
| Anderson, J. P.                   | 2001 | Activity limitations reported in the National Health Interview Survey: An anomaly and its effect on estimates of national well-being [1].                                                                   | Am J Pub Health 91(7): 1135-1136.               |
| Steiner, M. C. & Morgan, M.D.     | 2001 | Enhancing physical performance in chronic obstructive pulmonary disease.                                                                                                                                    | Thorax 56(1): 73-77.                            |
| Braghiroli, A. & Alvarez-Sala, R. | 2002 | Sleep disordered breathing and COPD.                                                                                                                                                                        | Sleep Breath 6(1): 1-2.                         |
| Dekhuijzen, P. N. R.              | 2002 | The Confronting COPD International Survey: Patients hardly know they have COPD.                                                                                                                             | Eur Respir J 20 (4): 793-794.                   |
| Sanjuas, C.                       | 2002 | [Dyspnea and quality of life in chronic obstructive pulmonary disease].                                                                                                                                     | Arch Bronconeumol 38(10): 485-488.              |
| Ayalon, L.                        | 2003 | Providing Care in the End of Life.                                                                                                                                                                          | Clin Case Stud 2(2): 107-126.                   |
| Booker, R.                        | 2003 | Nurses play 'pivotal' role in COPD.                                                                                                                                                                         | Br J Nurs (BJN) 12(18): 1062.                   |

|                                    |      |                                                                                                                                                  |                                                             |
|------------------------------------|------|--------------------------------------------------------------------------------------------------------------------------------------------------|-------------------------------------------------------------|
| Burckhardt, C. S. & Anderson, K.L. | 2003 | The Quality of Life Scale (QOLS): Reliability, validity, and utilization.                                                                        | Health Qual Life Outcomes 1(23).                            |
| Carlson, B. W. & Mascarella, J.J.  | 2003 | Change in Sleep Patterns in COPD.                                                                                                                | Am J Nurse 103(12): 71-74.                                  |
| Carlson, B. W. & Mascarella, J.J.  | 2003 | Living with illness. Changes in sleep patterns in COPD: a new vital sign in the management of people with chronic obstructive pulmonary disease. | Am J Nurse 103(12): 71.                                     |
| Celli, B. R.                       | 2003 | A 62-Year-Old Woman with Chronic Obstructive Pulmonary Disease.                                                                                  | JAMA 290(20): 2721-2729.                                    |
| Crockett, A.                       | 2003 | Coping with chronic obstructive pulmonary disease.                                                                                               | J Mens Health 2 (1): 20-23.                                 |
| Crouch, D.                         | 2003 | 'We're empowering, patients with COPD'.                                                                                                          | Nurs Times 99(31): 38-39.                                   |
| Hussey, J. & Wilson, F.            | 2003 | Measurement of activity levels is an important part of physiotherapy assessment.                                                                 | Physiother 89(10): 585-593.                                 |
| Laursen, L. C. & Dirksen, A.       | 2003 | Chronic obstructive pulmonary disease - An overlooked lifestyle disease. [Danish].                                                               | Ugeskrift for Laeger 165 (37): 3497.                        |
| Moy, M. L. et al.                  | 2003 | Ambulatory monitoring of cumulative free-living activity.                                                                                        | IEEE EngMed Biol Mag 22(3): 89-95.                          |
|                                    | 2003 | COPD: three effective steps to relief.                                                                                                           | Johns Hopkins Med Lett Health After 50 15 (1): 3, 7.        |
| Bourbeau, J. et al.                | 2004 | Self-management and behaviour modification in COPD.                                                                                              | Patient Educ Couns 52 (3): 271-277.                         |
| Coleman, K.                        | 2004 | Bodies in motion.                                                                                                                                | J Rehabil Res Devel 41(2): xi; author reply xii.            |
| Fanfulla, F. et al.                | 2004 | Sleep disordered breathing in patients with chronic obstructive pulmonary disease.                                                               | Minerva Medica 95(4): 307-321.                              |
| Karlin, C.                         | 2004 | Bodies in motion.                                                                                                                                | J Rehabil Res Dev 41(2): xi-xii; author reply xii.          |
| Partridge, M. R.                   | 2004 | Living with COPD: The patients' perspective.                                                                                                     | Eur Respir Rev 13(88): 1-5.                                 |
| Sankaranarayanan, V. et al.        | 2004 | Predicting outcomes in chronic obstructive pulmonary disease.                                                                                    | N Engl J Med 350(22): 2308-2310; author reply 2308-2310.    |
|                                    | 2004 | Patient advice. Chronic obstructive pulmonary disease (COPD) and exercise.                                                                       | SportEX Health(19): 17-17.                                  |
| Barnett, M.                        | 2005 | Caring for a patient with COPD: a reflective account.                                                                                            | Nurs Stand 19(36): 41-46.                                   |
| Bhullar, S. & Phillips B.          | 2005 | Sleep in COPD patients.                                                                                                                          | COPD 2(3): 355-361.                                         |
| Booker, R.                         | 2005 | Care of chronic conditions. Chronic obstructive pulmonary disease: non-pharmacological approaches.                                               | Br J Nurs 14(1): 14-18.                                     |
| Palomba, B.                        | 2005 | [Question 4-7. Activities of daily living in patients with chronic obstructive pulmonary disease].                                               | Rev Mal Respir 22(5 Pt 3): 7S86.                            |
| Palomba, B.                        | 2005 | Question 4-7. Daily life activities.                                                                                                             | Question 4-7. Les activités de la vie journalière 22(5 C3). |

|                         |      |                                                                                                                                                                                                                               |                                                                                                   |
|-------------------------|------|-------------------------------------------------------------------------------------------------------------------------------------------------------------------------------------------------------------------------------|---------------------------------------------------------------------------------------------------|
| Vanhees, L et al.       | 2005 | How to assess physical activity? How to assess physical fitness.                                                                                                                                                              | Eur J Cardiovasc Prev Rehabil 12(2): 102-114.                                                     |
| Varray, A.              | 2005 | Question 3-6. Physical activity questionnaires - Application in COPD.                                                                                                                                                         | Question 3-6. Les questionnaires d'activité physique - Application aux BPCO 22(5 C3): 7S47-47S53. |
|                         | 2005 | Statement on home care for patients with respiratory disorders.                                                                                                                                                               | Am J Respir Crit Care Med 171(12): 1443-1464.                                                     |
|                         | 2005 | Independent Nurse: Patients fear hospital above symptoms.                                                                                                                                                                     | GP: General Practitioner: 91-92.                                                                  |
| Adams, S. G.            | 2006 | Managing COPD to improve quality of life.                                                                                                                                                                                     | Drug Benefit Trends 18 (4): 259-265.                                                              |
| Calverley, P. M. A.     | 2006 | Caring for the burden of COPD.                                                                                                                                                                                                | Thorax. 61: 831-832.                                                                              |
| Corbo, G. M.            | 2006 | Chronic obstructive pulmonary disease and asthma in the primary care setting: simple questionnaires can promote patient awareness and provide feedback to physicians.                                                         | Respiration 73(3): 277-278.                                                                       |
| Dahlin, C.              | 2006 | It takes my breath away end-stage COPD. Part 2: pharmacologic and nonpharmacologic management of dyspnea and other symptoms.                                                                                                  | Home Healthc Nurse 24(4): 218-224; quiz 225-216.                                                  |
| Dahlin, C.              | 2006 | It takes my breath away: end-stage COPD. Part 1: a case study and an overview of COPD.                                                                                                                                        | Home Healthc Nurse 24(3): 148-155; quiz 156-147.                                                  |
| Foy, C. G. et al.       | 2006 | The Reconditioning Exercise and Chronic Obstructive Pulmonary Disease Trial II (REACT II): rationale and study design for a clinical trial of physical activity among individuals with chronic obstructive pulmonary disease. | Contemp Clin Trials 27(2): 135-146.                                                               |
| Goldstein, R.           | 2006 | Physical activity, spirometry and quality-of-life in chronic obstructive pulmonary disease.                                                                                                                                   | COPD 3(2): 71-72.                                                                                 |
| O'Donnell, D. E.        | 2006 | Journal of Aging and Physical Activity: Introduction.                                                                                                                                                                         | Proc Am ThoraciSoc 3(2): 175.                                                                     |
| Pitta, F. et al.        | 2006 | Quantifying physical activity in daily life with questionnaires and motion sensors in COPD.                                                                                                                                   | Eur Respir J 27(5): 1040-1055.                                                                    |
| Reardon, J. Z. et al.   | 2006 | Functional status and quality of life in chronic obstructive pulmonary disease.                                                                                                                                               | Am J Med 119(10 Suppl 1): 32-37.                                                                  |
| Swisher, A. K.          | 2006 | Study of energy expenditure during activities of daily living using and not using body position recommended by energy conservation techniques in patients with COPD.                                                          | Cardiopulmon Phys Ther J 17(4): 139-139.                                                          |
| Varray, A.              | 2006 | Improving Health Status Through Physical Activity for Individuals With Chronic Pulmonary Diseases.                                                                                                                            | Adapt Phys Activ Q 23(2): 112-128.                                                                |
| Abramson, M. et al.     | 2007 | Managing chronic obstructive pulmonary disease.                                                                                                                                                                               | Aust Prescr 30 (3): 64-67.                                                                        |
| Appel, K.               | 2007 | Elderly patients with COPD tend to increased resting energy expenditure. [German].                                                                                                                                            | Pneumologie 61 (12): 754.                                                                         |
| Berry, M. J.            | 2007 | The relationship between exercise tolerance and other outcomes in COPD.                                                                                                                                                       | COPD 4(3): 205-216.                                                                               |
| Boggia, B. et al.       | 2007 | Burden of copd on health profiles in different work attvities.                                                                                                                                                                | G Ital Med Lav Ergon 29(3): 835-836.                                                              |
| Bourbeau, J. & Nault D. | 2007 | Self-Management Strategies in Chronic Obstructive Pulmonary Disease.                                                                                                                                                          | Clin Chest Med 28 (3): 617-628.                                                                   |

|                                |      |                                                                                                                                                                                                         |                                             |
|--------------------------------|------|---------------------------------------------------------------------------------------------------------------------------------------------------------------------------------------------------------|---------------------------------------------|
| Bruce, M. L. & McEvoy, P.      | 2007 | COPD Your Role in Early Detection.                                                                                                                                                                      | Nurse Practit 32(11): 24-34.                |
| Casaburi, R.                   | 2007 | Activity monitoring in assessing activities of daily living.                                                                                                                                            | COPD 4(3): 251-255.                         |
| Corsonello, A. et al.          | 2007 | Functional status in chronic obstructive pulmonary disease.                                                                                                                                             | Am J Med 120(10): e9; author reply e11.     |
| Davidson, M. & de Morton, N.   | 2007 | A systematic review of the human activity profile.                                                                                                                                                      | Clin Rehabil 21(2): 151-162.                |
| de Vries, U. & Petermann, F.   | 2007 | [How do patients with COPD circumvent their disease? Psychological factors].                                                                                                                            | Dtsch Med Wochenschr 132(31-32): 1639-1643. |
| García Rfo, F.                 | 2007 | Daily living activity in COPD: A new parameter to be evaluated?                                                                                                                                         | Med Clin 129(9): 337-338.                   |
| Goodell, T. T.                 | 2007 | Sexuality in Chronic Lung Disease.                                                                                                                                                                      | Nurs Clin North Am 42(4): 631-638.          |
| Plasqui, G. & Westerterp, K.R. | 2007 | Physical activity assessment with accelerometers: An evaluation against doubly labeled water.                                                                                                           | Obesity 15(10): 2371-2379.                  |
| Stull, D. E. et al.            | 2007 | Measuring functional performance in patients with COPD: A discussion of patient-reported outcome measures.                                                                                              | Curr Med Res Opin 23(11): 2655-2665.        |
| ZuWallack, R.                  | 2007 | How are you doing? What are you doing? Differing perspectives in the assessment of individuals with COPD.                                                                                               | COPD 4(3): 293-297.                         |
| Aguirre-Kelley, L.             | 2008 | Coming of age. Energy conservation for the COPD patient.                                                                                                                                                | AARC Times 32(11): 24.                      |
| Agusti, A.                     | 2008 | Physical activity and chronic obstructive pulmonary disease.                                                                                                                                            | Am J Respir Crit Care Med 177(7): 675-676.  |
| Bidwell, B. & Schlosser J.     | 2008 | Sleep waves. Sleep and COPD.                                                                                                                                                                            | AARC Times 32(11): 16.                      |
| Gosker, H. R. & Schols, A.     | 2008 | The major limitation to exercise performance in COPD is inadequate energy supply to the respiratory and locomotor muscles vs. lower limb muscle dysfunction vs. dynamic hyperinflation. Missing pieces. | J Appl Physiol 105(2): 761.                 |
| Janssen, D. J. A. et al.       | 2008 | Daily symptom burden in end-stage chronic organ failure: A systematic review.                                                                                                                           | Palliat Med 22(8): 938-948.                 |
| Kaptein, A. A. et al.          | 2008 | Illness perceptions and COPD: An emerging field for COPD patient management.                                                                                                                            | J Asthma 45(8): 625-629.                    |
| Morgan, M.                     | 2008 | Life in slow motion: quantifying physical activity in COPD.                                                                                                                                             | Thorax. 63: 663-664.                        |
| Prince, S. A. et al.           | 2008 | "A comparison of direct versus self-report measures for assessing physical activity in adults: A systematic review."                                                                                    | Int J Behav Nutr Phys Act 5.                |
| Rozenbaum, W. V.               | 2008 | Patients with chronic obstructive pulmonary disease: Between reality and expectations - A patient's perspective.                                                                                        | Dis Manage Health Outcomes 16 (5): 353-358. |
| Westerterp, K. R.              | 2008 | Physical activity as determinant of daily energy expenditure.                                                                                                                                           | Physio Behav 93(4-5): 1039-1043.            |
|                                | 2008 | Respiratory nursing. Disturbed sleep for patients with COPD.                                                                                                                                            | Nursing Times 104(9): 38-38.                |

|                                    |      |                                                                                                                                                                                                           |                                              |
|------------------------------------|------|-----------------------------------------------------------------------------------------------------------------------------------------------------------------------------------------------------------|----------------------------------------------|
|                                    | 2008 | Summaries for Patients. Effects of home-based pulmonary rehabilitation in patients with chronic obstructive lung disease.[Original report in Ann Intern Med. 2008 Dec 16;149(12):869-78; PMID: 19075206]. | Ann Int Med 149(12): 156.                    |
| Benzo, R.                          | 2009 | Activity monitoring in chronic obstructive pulmonary disease.                                                                                                                                             | J Cardiopul Rehabil Prev 29(6): 341-347.     |
| Blumenthal, J. A. et al.           | 2009 | Caregiver-assisted coping skills training for patients with COPD: background, design, and methodological issues for the INSPIRE-II study.                                                                 | Clin Trials 6(2): 172-184.                   |
| Bourbeau, J.                       | 2009 | Activities of life: the COPD patient.                                                                                                                                                                     | COPD 6(3): 192-200.                          |
| Esteban, C.                        | 2009 | [Role of physical activity in chronic obstructive pulmonary disease].                                                                                                                                     | Arch Bronconeumol 45 Suppl 5: 7-13.          |
| Guirao-Goris, J. A. et al.         | 2009 | Structured review of physical activity measurement with questionnaires and scales in older adults and the elderly.                                                                                        | Grac Sanit 23(4): 334.e331-334.e317.         |
| Langer, D. et al.                  | 2009 | Quantifying physical activity in COPD: different measures for different purposes.                                                                                                                         | Thorax 64(5): 458; author reply 458-459.     |
| Pairon, J. C. et al.               | 2009 | COPD and work.                                                                                                                                                                                            | Rev Mal Respir Actual (SUPPL. 2): S118-S120. |
| Roche, N.                          | 2009 | Activity limitation: a major consequence of dyspnoea in COPD.                                                                                                                                             | Eur Respir Rev 18(112): 54-57.               |
| Troosters, T.                      | 2009 | Physical activity monitoring: a new outcome facing many challenges, but yielding promising results.                                                                                                       | COPD 6(2): 82-83.                            |
| Vogiatzis, I. & Zakyntinos, S.     | 2009 | Physical inactivity: common pathway to peripheral muscle weakness in chronic respiratory diseases?                                                                                                        | Eur Respir J 34(6): 1213-1214.               |
| Walker, P.                         | 2009 | Use of pedometers to measure activity in COPD patients -- a step too far?                                                                                                                                 | Chron Respir Dis 6(4): 199-200.              |
| Watz, H. et al.                    | 2009 | Physical activity in patients with COPD.[Erratum appears in Eur Respir J. 2010 Aug;36(2):462].                                                                                                            | Eur Respir J 33(2): 262-272.                 |
| Zuwallack, R. L.                   | 2009 | How do we increase activity and participation in our patients?                                                                                                                                            | Semin Respi Crit Care Med 30(6): 708-712.    |
| Adami, P. E. et al.                | 2010 | The role of physical activity in the prevention and treatment of chronic diseases.                                                                                                                        | Clin Ter 161 (6): 537-541.                   |
| Bajwa, A. A. et al.                | 2010 | A 19-year-old man with severe obstructive lung disease.                                                                                                                                                   | Respir Med CME 3 (3): 153-155.               |
| Barczok, M.                        | 2010 | [Physical exercise is essential for COPD-patients].                                                                                                                                                       | MMW Fortschr Med 152(48): 45-46.             |
| Christiansen, S. & Frederiksen, K. | 2010 | How patients with chronic obstructive pulmonary disease (COPD) experience dyspnea [Danish].                                                                                                               | Sygeplejersken 110(13): 70-81.               |
| Duran-Cantolla, J. et al.          | 2010 | [Chronic obstructive pulmonary disease and sleep apneas].                                                                                                                                                 | Arch Bronconeumol 46 Suppl 3: 2-10.          |
| Gardiner, C. et al.                | 2010 | Exploring the care needs of patients with advanced COPD: An overview of the literature.                                                                                                                   | Respir Med 104 (2): 159-165.                 |
| Koehler, U. et al.                 | 2010 | Sport activities of patients with severe COPD in an outpatient setting only possible with self-guidance?                                                                                                  | Pulmonologia 64(3): 194-195.                 |

|                                  |      |                                                                                                                                                                              |                                                                                            |
|----------------------------------|------|------------------------------------------------------------------------------------------------------------------------------------------------------------------------------|--------------------------------------------------------------------------------------------|
| Terrie, Y. C.                    | 2010 | Coping with chronic obstructive pulmonary disease.                                                                                                                           | Pharm Times 76(4).                                                                         |
| Thomas, M. J. et al.             | 2010 | The impact of home-based physiotherapy interventions on breathlessness during activities of daily living in severe COPD: a systematic review.                                | Physiotherapy 96(2): 108-119.                                                              |
| Vuillemin, A. & Pierre, M.C.     | 2010 | Added value of the daily physical activity measurement in the evaluation of a chronic respiratory disease.                                                                   | Rev Mal Respir Actual 2(6): 601-603.                                                       |
| Yang, C. C. & Hsu, Y.L.          | 2010 | A review of accelerometry-based wearable motion detectors for physical activity monitoring.                                                                                  | Sensors 10(8): 7772-7788.                                                                  |
|                                  | 2010 | Chronic obstructive pulmonary disease: it takes your breath away.                                                                                                            | Harv Mens Health Watch 14 (7): 1-4.                                                        |
| Agusti, A. et al.                | 2011 | Night-time symptoms: A forgotten dimension of COPD.                                                                                                                          | Euro Respir Rev 20(121): 183-194.                                                          |
| Berman, A. R.                    | 2011 | Management of Patients with End-Stage Chronic Obstructive Pulmonary Disease.                                                                                                 | Prim Care 38 (2): 277-297.                                                                 |
| Bhatti, Z. U. et al.             | 2011 | Chronic diseases influence major life changing decisions: A new domain in quality of life research.                                                                          | J R Soc Med 105(6): 241-250.                                                               |
| Bossenbroek, L. et al.           | 2011 | Daily physical activity in patients with chronic obstructive pulmonary disease: A systematic review.                                                                         | COPD 8 (4): 306-319.                                                                       |
| Casaburi, R.                     | 2011 | Activity promotion: a paradigm shift for chronic obstructive pulmonary disease therapeutics.                                                                                 | Proc Am Thorac Soc 8(4): 334-337.                                                          |
| Cooke, J. R. & Ancoli-Israel, S. | 2011 | Chapter 41 - Normal and abnormal sleep in the elderly.                                                                                                                       | Handbook of Clinical Neurology. M. Pasquale and C. Sudhansu, Elsevier. Volume 98: 653-665. |
| Gimeno-Santos, E. et al.         | 2011 | Validity of instruments to measure physical activity may be questionable due to a lack of conceptual frameworks: A systematic review.                                        | Health Qual Life Outcomes 9.                                                               |
| Jones, P. W.                     | 2011 | COPD: Functional status, health status and primary care.                                                                                                                     | Prim Care Respir J 20 (3): 227-228.                                                        |
| Ruhle, K. H. et al.              | 2011 | Telemedicine and training in COPD. [German].                                                                                                                                 | Pneumologie 65 (10): 596-601.                                                              |
| Troosters, T. et al.             | 2011 | Assessing the impact of tiotropium on lung function and physical activity in GOLD stage II COPD patients who are naïve to maintenance respiratory therapy: A study protocol. | Open Respir Med J 5(1): 1-9.                                                               |
| Tudor-Locke, C. et al.           | 2011 | How many steps/day are enough? For older adults and special populations.                                                                                                     | Int J Behavi Nutr Phys Act 8.                                                              |
| Vorrink, S. N. W. et al.         | 2011 | Level of daily physical activity in individuals with COPD compared with healthy controls.                                                                                    | Respir Res : 33.                                                                           |
| Wouters, E. F. et al.            | 2011 | Survival and Physical Activity in COPD: A Giant Leap Forward!                                                                                                                | CHEST 140(2): 279-281.                                                                     |
| Giacomini, M. et al.             | 2012 | "Experiences of living and dying with COPD: a systematic review and synthesis of the qualitative empirical literature."                                                      | Ont Health Technol Assess Ser 12(13): 1-47.                                                |
| Taraldsen, K et al.              | 2012 | Physical activity monitoring by use of accelerometer-based body-worn sensors in older adults: A systematic literature review of current knowledge and applications.          | Maturitas 71(1): 13-19.                                                                    |

**Table OS3.1:** Not Original Research

## No COPD Diagnosis

| Author                         | Year | Title                                                                                                                                                                                         | Citation                                                      |
|--------------------------------|------|-----------------------------------------------------------------------------------------------------------------------------------------------------------------------------------------------|---------------------------------------------------------------|
| Gerbert, B. & Hargreaves, W.A. | 1986 | Measuring physician behavior.                                                                                                                                                                 | Med Care 24(9): 838-847.                                      |
| Kaplan, S. H.                  | 1987 | Patient reports of health status as predictors of physiologic health measures in chronic disease.                                                                                             | J Chron Dis 40, Supplement 1(0): 27S-35S.                     |
| Fioravanti, M. et al.          | 1996 | Quality of life in chronic diseases of the aged: the importance of cognitive deterioration.                                                                                                   | Arch Gerontol Geriatr 22(3): 195-205.                         |
| Kishimoto, M. et al.           | 1998 | Relationship between the Level of Activities of Daily Living and Chronic Medical Conditions among the Elderly.                                                                                | J Epidemiol 8(5): 272-277.                                    |
| Ayres, L.                      | 2000 | Narratives of family caregiving: The process of making meaning.                                                                                                                               | Res Nurs Health 23(6): 424-434.                               |
| Miller, M. E. et al.           | 2000 | Physical activity, functional limitations, and disability in older adults.                                                                                                                    | Journal of the American Geriatrics Society 48(10): 1264-1272. |
| Resnick, B.                    | 2001 | Testing a model of overall activity in older adults.                                                                                                                                          | J Aging Phys Act 9(2): 142-160.                               |
| Schwartz, A. L. et al.         | 2002 | Measurement of fatigue: determining minimally important clinical differences.                                                                                                                 | J Clin Epidemiol 55(3): 239-244.                              |
| Vignatelli, L. et al.          | 2004 | Health-related quality of life in Italian patients with narcolepsy: The SF-36 health survey.                                                                                                  | Sleep Med 5(5): 467-475.                                      |
| Baiardini, I. et al.           | 2005 | A new tool to assess and monitor the burden of chronic cough on quality of life: Chronic Cough Impact Questionnaire.                                                                          | Allergy 60 (4): 482-488.                                      |
| Elavsky, S. et al.             | 2005 | Physical activity enhances long-term quality of life in older adults: Efficacy, esteem, and affective influences.                                                                             | Ann Behav Med 30(2): 138-145.                                 |
| Jerant, A. F. et al.           | 2005 | Patients' perceived barriers to active self-management of chronic conditions.                                                                                                                 | Patient Educ Couns 57(3): 300-307.                            |
| Mâsse, L. C. et al.            | 2005 | Accelerometer data reduction: A comparison of four reduction algorithms on select outcome variables.                                                                                          | Med Sci Sports Exerc 37(11 SUPPL.): S544-S554.                |
| Aalto, A. M. et al.            | 2006 | Sociodemographic, disease status, and illness perceptions predictors of global self-ratings of health and quality of life among those with coronary heart disease - One year follow-up study. | Qual Life Res 15(8): 1307-1322.                               |
| Schnohr, P. et al.             | 2006 | Long-term physical activity in leisure time and mortality from coronary heart disease, stroke, respiratory diseases, and cancer. The Copenhagen City Heart Study.                             | Eu J Cardiovasc Prev Rehabil 13(2): 173-179.                  |
| Ortega-Smith, E. M. et al.     | 2007 | The role of social support and self-efficacy in shaping the leisure time physical activity of older adults.                                                                                   | J Leis Res 39(4): 705-727.                                    |
| Shaaban, R. et al.             | 2007 | Physical activity and bronchial hyperresponsiveness: European Community Respiratory Health Survey II.                                                                                         | Thorax 62(5): 403-410.                                        |
| Warms, C. A. et al.            | 2007 | Correlates of physical activity in adults with mobility limitations.                                                                                                                          | Fam Community Health 30(SUPPL. 2): S5-S16.                    |
| Augustovski, F. A. et al.      | 2008 | The Argentine-Spanish SF-36 Health Survey was successfully validated for local outcome research.                                                                                              | J Clin Epidemiol 61(12): 1279-1284.e1276.                     |

|                      |      |                                                                                                                                                                              |                                                                          |
|----------------------|------|------------------------------------------------------------------------------------------------------------------------------------------------------------------------------|--------------------------------------------------------------------------|
| Kao, M. C. J. et al. | 2011 | Determinants of physical activity: A first characterization of the nationally representative physical activity database in national health and nutrition examination survey. | PM and R Conference: Conference Publication: 3 (10 SUPPL. 1): S164-S165. |
| Mollaoglu, M. et al. | 2011 | Fatigue and disability in elderly patients with chronic obstructive pulmonary disease (COPD).                                                                                | Arch Gerontol Geriatr 53(2): e93-e98.                                    |
| Redondo, A. et al.   | 2011 | Trends in Leisure Time Physical Activity Practice in the 1995-2005 Period in Girona.                                                                                         | Rev Espa Cardiol 64(11): 997-1004.                                       |

**Table OS3.2:** No COPD Diagnosis

#### Failed to report a Free Living Activity

| Author                         | Year | Title                                                                                                                                                   | Citation                                    |
|--------------------------------|------|---------------------------------------------------------------------------------------------------------------------------------------------------------|---------------------------------------------|
| Alpert, J. S et al.            | 1974 | Effects of physical training on hemodynamics and pulmonary function at rest and during exercise in patients with chronic obstructive pulmonary disease. | Chest 66(6): 647-651.                       |
| Mertens, D. J. et al.          | 1978 | Long-term exercise for chronic obstructive lung disease.                                                                                                | Respiration 35(2): 96-107.                  |
| Lagerson, J.                   | 1979 | Home care of patients with chronic obstructive pulmonary disease.                                                                                       | Ph.D., Union Institute and University.      |
| Fleetham, J. et al.            | 1982 | Sleep, arousals, and oxygen desaturation in chronic obstructive pulmonary disease. The effect of oxygen therapy.                                        | Am Rev Respir Dis 126(3): 429-433.          |
| Fletcher, E. C. & Martin, R.J. | 1982 | Sexual dysfunction and erectile impotence in chronic obstructive pulmonary disease.                                                                     | Chest 81(4): 413-421.                       |
| McSweeney, A. J. et al.        | 1982 | Life quality of patients with chronic obstructive pulmonary disease.                                                                                    | Arch Intern Med 142(3): 473-478.            |
| Hoberty, R. J. & Craig, M.W.   | 1983 | 'Living up to par'. A golf tournament for persons with COPD.                                                                                            | Respir Care 28 (11): 1480-1483.             |
| Stockdale-Woolley, R.          | 1983 | Sexual dysfunction and COPD: problems and management.                                                                                                   | Nurse Practitioner 8(2): 16-17.             |
| Barnes, L.                     | 1984 | Jogging the lungs good for patients with COLD. (chronic obstructive lung disease).                                                                      | Phys Sportsmed 12(2): 22-22.                |
| Kaplan, R. M. et al.           | 1984 | Validity of a quality of well-being scale as an outcome measure in chronic obstructive pulmonary disease.                                               | J Chron Dis37(2): 85-95.                    |
| Lee, H. Y. et al.              | 1984 | Exercise performance in male patients with chronic obstructive pulmonary disease.                                                                       | Taiwan I Hsueh Hui Tsa Chih 83(5): 444-451. |
| Santoro, K.                    | 1985 | A vacation cruise for COPD patients.                                                                                                                    | Respir Ther 15(4): 31-35.                   |
| Sexton, D. L. & Munro, B.H.    | 1985 | Impact of a husband's chronic illness (COPD) on the spouse's life.                                                                                      | Res Nurs Health 8 (1): 83-90.               |
| Belman, M. J.                  | 1986 | Exercise in chronic obstructive pulmonary disease.                                                                                                      | Clin Chest Med 7(4): 585-597.               |
| Keller, C.                     | 1986 | Predicting the performance of daily activities of patients with chronic lung disease.                                                                   | PerceptMot Skills 63 (2 Pt 1): 647-651.     |



|                                 |      |                                                                                                                                                                                                                  |                                                     |
|---------------------------------|------|------------------------------------------------------------------------------------------------------------------------------------------------------------------------------------------------------------------|-----------------------------------------------------|
| Phillips, M. A.                 | 1986 | A subjective ADL rating scale for the pulmonary rehabilitation patient.                                                                                                                                          | Occ Ther Health Care 3 (1): 79-88.                  |
| Dardes, N. et al.               | 1990 | Quality of life of COPD patients treated by long-term oxygen.                                                                                                                                                    | Lung 168 Suppl: 789-793.                            |
|                                 | 1990 | EuroQol - a new facility for the measurement of health-related quality of life.                                                                                                                                  | Health Policy 16(3): 199-208.                       |
|                                 | 1990 | Exercising safely with COPD.                                                                                                                                                                                     | AARC Times 14(12): 45-45.                           |
| Wigal, J. K. et al.             | 1991 | The COPD Self-Efficacy Scale.                                                                                                                                                                                    | Chest 99(5): 1193-1196.                             |
| Anderson, K. L.                 | 1993 | Quality of life in chronic obstructive pulmonary disease.                                                                                                                                                        | PH.D., OREGON HEALTH SCIENCES UNIVERSITY.           |
| Gislason, T. et al.             | 1993 | Sleep habits and sleep disturbances among the elderly - An epidemiological survey.                                                                                                                               | J Int Med 234(1): 31-39.                            |
| Anderson, K. L.                 | 1995 | The effect of chronic obstructive pulmonary disease on quality of life.                                                                                                                                          | Res Nurs Health 18(6): 547-556.                     |
| Baldwin, D. R. et al.           | 1995 | Nocturnal oxygen desaturation and exercise-induced desaturation in subjects with chronic obstructive pulmonary disease.                                                                                          | Resp Med 89(9): 599-601.                            |
| Leidy, N. K.                    | 1995 | Functional performance in people with chronic obstructive pulmonary disease.                                                                                                                                     | Image: Journal of Nursing Scholarship 27(1): 23-35. |
| Mahler, D. A. & Mackowiak, J.I. | 1995 | Evaluation of the short-form 36-item questionnaire to measure health-related quality of life in patients with COPD.                                                                                              | Chest 107 (6): 1585-1589.                           |
|                                 | 1995 | Respiratory rehab proves its worth.                                                                                                                                                                              | Am J Nurs 95(3): 9.                                 |
| Dishman, R. K. & Buckworth, J.  | 1996 | "Increasing physical activity: A quantitative synthesis."                                                                                                                                                        | Med Sci Sports Ex 28(6): 706-719.                   |
| Baarends, E. M et al.           | 1997 | Total free living energy expenditure in patients with severe chronic obstructive pulmonary disease.                                                                                                              | Am J Respir Crit Care Med 155(2): 549-554.          |
| Baarends, E. M. et al.          | 1997 | Total daily energy expenditure relative to resting energy expenditure in clinically stable patients with COPD.                                                                                                   | Thorax 52(9): 780-785.                              |
| Eakin, E. G. & Glasgow, R.E.    | 1997 | The patients' perspective on the self-management of chronic obstructive pulmonary disease.                                                                                                                       | J Health Psychol 2 (2): 245-253.                    |
| Maillé, A. R. et al.            | 1997 | The development of the 'Quality-of-Life for Respiratory Illness Questionnaire (QOL-RIQ)': A disease-specific quality-of-life questionnaire for patients with mild to moderate chronic non-specific lung disease. | Resp Med 91(5): 297-309.                            |
| Schönhofer, B. et al.           | 1997 | Evaluation of a movement detector to measure daily activity in patients with chronic lung disease.                                                                                                               | Eur Respir J 10(12): 2814-2819.                     |
| Tu, S. P. et al.                | 1997 | A new self-administered questionnaire to monitor health-related quality of life in patients with COPD.                                                                                                           | Chest 112 (3): 614-622.                             |
| Antonelli Incalzi, R. et al.    | 1998 | Predicting cognitive decline in patients with hypoxaemic COPD.                                                                                                                                                   | Resp Med 92 (3): 527-533.                           |
| Breslin, E. et al.              | 1998 | Perception of fatigue and quality of life in patients with COPD.                                                                                                                                                 | Chest 114(4): 958-964.                              |

|                                   |      |                                                                                                                                                                            |                                         |
|-----------------------------------|------|----------------------------------------------------------------------------------------------------------------------------------------------------------------------------|-----------------------------------------|
| Brown, L. K.                      | 1998 | Sleep-related disorders and chronic obstructive pulmonary disease.                                                                                                         | Resp Care Clin N Am 4(3): 493-512.      |
| Jonsdottir, H.                    | 1998 | Life patterns of people with chronic obstructive pulmonary disease: isolation and being closed in.                                                                         | NursSci Q 11(4): 160-166.               |
| Yohannes, A. M. et al.            | 1998 | A comparison of the Barthel index and Nottingham extended activities of daily living scale in the assessment of disability in chronic airflow limitation in old age.       | Age Ageing 27 (3): 369-374.             |
| Yohannes, A. M. et al.            | 1998 | Elderly people at home disabled by chronic obstructive pulmonary disease.                                                                                                  | Age Ageing 27(4): 523-525.              |
| Yohannes, A. M. et al.            | 1998 | Quality of life in elderly patients with COPD: measurement and predictive factors.                                                                                         | Resp Med 92(10): 1231-1236.             |
| Allison, S. S. & Yohannes, A.M.   | 1999 | Consequences of chronic obstructive pulmonary disease in community-based patients.                                                                                         | Physiother 85 (12): 663-668.            |
| Bestall, J. C. et al.             | 1999 | Usefulness of the Medical Research Council (MRC) dyspnoea scale as a measure of disability in patients with chronic obstructive pulmonary disease.                         | Thorax 54(7): 581-586.                  |
| Sans-Torres, J. et al.            | 1999 | An assessment of the quality of life of patients with COPD and chronic hypoxemia by using the Spanish version of the Chronic Respiratory Disease Questionnaire. [Spanish]. | Arch Bronconeumol 35 (9): 428-434.      |
| Vigotti, M. A.                    | 1999 | Short-term effects of exposure to urban air pollution on human health in Europe. The APHEA Projects (Air Pollution and Health: a European Approach. [Italian].             | Epidemiol Prev 23 (4): 408-415.         |
| Camp, P. G. et al.                | 2000 | Quality of life after pulmonary rehabilitation: assessing change using quantitative and qualitative methods.                                                               | Phys Therap 80(10): 986-995.            |
| Coakley, A. L. & Ruston, A.       | 2000 | Promoting better health for patients with chronic obstructive pulmonary disease.                                                                                           | J R Soc Promot Health 120 (3): 142-143. |
| Lynn, J. et al.                   | 2000 | Living and dying with chronic obstructive pulmonary disease.                                                                                                               | J Am Geriatr Soc 48(5 Suppl): S91-100.  |
| Newman, A. B. et al.              | 2000 | Daytime sleepiness predicts mortality and cardiovascular disease in older adults.                                                                                          | J Am Geriatr Soc 48(2): 115-123.        |
| Ruiz de Ona Lacasta, J. M. et al. | 2000 | A comparison of several measurement scales for assessing dyspnea in their daily activities in patients with chronic obstructive lung disease. [Spanish].                   | Arch Bronconeumol 36 (1): 25-28.        |
| Simonsick, E. M. et al.           | 2000 | Assessment of physical function and exercise tolerance in older adults: Reproducibility and comparability of five measures.                                                | Aging Clin Exo Res 12(4): 274-280.      |
| Steele, B. G. et al.              | 2000 | Quantitating physical activity in COPD using a triaxial accelerometer.                                                                                                     | Chest 117(5): 1359-1367.                |
| Yohannes, A. et al.               | 2000 | The Manchester Respiratory Activities of Daily Living Questionnaire: development, reliability, validity, and responsiveness to pulmonary rehabilitation.                   | J Am Geriatr Soc 48(11): 1496-1500.     |
| Yohannes, A. M. et al.            | 2000 | The Manchester Respiratory Activities of Daily Living questionnaire: development, reliability, validity, and responsiveness to pulmonary rehabilitation.                   | J Am Geriatr Soc 48(11): 1496-1500.     |
| Belza, B. et al.                  | 2001 | Correlates of physical activity in chronic obstructive pulmonary disease.                                                                                                  | Nursing Res 50(4): 195-202.             |
| Boueri, F. M. V. et al.           | 2001 | Quality of life measured with a generic instrument (Short Form-36) improves following pulmonary rehabilitation in patients with COPD.                                      | Chest 119 (1): 77-84.                   |
| Cantley, M. E. G. (2001).         | 2001 | Patient responses to COPD symptoms: The relationship of dyspnea and fatigue to activities of                                                                               | Ph.D., Virginia Commonwealth            |

|                               |      |                                                                                                                                                        |                                              |
|-------------------------------|------|--------------------------------------------------------------------------------------------------------------------------------------------------------|----------------------------------------------|
|                               |      | daily living, inhaler use, and self-care capability                                                                                                    | University.                                  |
| Dos Santos, J. M. & Moita, J. | 2001 | Quality of sleep and nocturnal desaturation in patients with chronic obstructive pulmonary disease and hypoxemia between 55-70 mmHg.                   | Rev Port Pneumol 7 (2): 115-124.             |
| Ibanez, M. et al.             | 2001 | Sexuality in chronic respiratory failure: coincidences and divergences between patient and primary caregiver.                                          | Resp Med 95(12): 975-979.                    |
| Mackenbach, J. P. et al.      | 2001 | Determinants of levels and changes of physical functioning in chronically ill persons: Results from the GLOBE study.                                   | J Epidemiol Community Health 55(9): 631-638. |
| Singh, S. & Morgan, M.D.L.    | 2001 | Activity monitors can detect brisk walking in patients with chronic obstructive pulmonary disease.                                                     | J Cardiopul Rehab 21 (3): 143-148.           |
| Wu, C. et al.                 | 2001 | Coping behaviors of individuals with chronic obstructive pulmonary disease.                                                                            | MEDSURG Nursing 10(6): 315-320.              |
| Baker, C. F. & Scholz, J.A.   | 2002 | Coping with symptoms of dyspnea in chronic obstructive pulmonary disease... including commentary by Mauk KL.                                           | Rehab Nurse 27(2): 67-74.                    |
| Crockett, A. J. et al.        | 2002 | The impact of anxiety, depression and living alone in chronic obstructive pulmonary disease.                                                           | Qual Life Res 11 (4): 309-316.               |
| Grosbois, J. M.               | 2002 | [COPD, exercise and quality-of-life].                                                                                                                  | Rev Pneumol Clin 58(4 Pt 2): 2S19-23.        |
| Jeng, C. et al.               | 2002 | Experiences of daily activities within two weeks after hospital discharge among Taiwanese elderly patients with chronic obstructive pulmonary disease. | J Nurse Res 10 (3): 168-176.                 |
| Toms, J. & Harrison, K.       | 2002 | Living with Chronic Lung Disease and the Effect of Pulmonary Rehabilitation: Patients' Perspectives.                                                   | Physiother 88(10): 605-619.                  |
| Yohannes, A. M. et al.        | 2002 | Reliability of the Manchester Respiratory Activities of Daily Living Questionnaire as a postal questionnaire.                                          | Age Ageing 31(5): 355-358.                   |
| ZuWallack, R.                 | 2002 | Clinical interpretation of health-related quality of life outcomes in COPD: Application to clinical care.                                              | Eur Respir Rev 12 (83): 92-97.               |
|                               | 2002 | Physical activity and COPD.                                                                                                                            | SportEX Health(14): 13-13.                   |
| Ashmore, J. A.                | 2003 | Marital adjustment among COPD patients participating in exercise rehabilitation.                                                                       | Ph.D., Ohio State University.                |
| Bellia, V. et al.             | 2003 | Sleep disorders in the elderly with and without chronic airflow obstruction: the SARA study.                                                           | Sleep 26(3): 318-323.                        |
| Bellia, V. et al.             | 2003 | Questionnaires, spirometry and PEF monitoring in epidemiological studies on elderly respiratory patients.                                              | Eur Respir J , Supplement 21(40): 21S-27S.   |
| Brawley, L. R. et al.         | 2003 | Promoting physical activity for older adults: The challenges for changing behavior.                                                                    | Am J Prev Med 25(3 SUPPL. 2): 172-183.       |
| Burckhardt, C. S. et al.      | 2003 | The Flanagan Quality of Life Scale: Evidence of construct validity.                                                                                    | Health Qual Life Outcomes 1(23).             |
| Coronado, M. et al.           | 2003 | Walking activity measured by accelerometry during respiratory rehabilitation.                                                                          | J Cardiopulm Rehabil 23(5): 357-364.         |
| Falter, L. et al.             | 2003 | Adaptation to disability in chronic obstructive pulmonary disease: neglected relationships to older adults' perceptions of independence.               | Disabil & Rehab 25(14): 795-806.             |

|                                  |      |                                                                                                                                                                                                |                                             |
|----------------------------------|------|------------------------------------------------------------------------------------------------------------------------------------------------------------------------------------------------|---------------------------------------------|
| Fried, T. R. et al.              | 2003 | Prognosis communication in serious illness: Perceptions of older patients, caregivers, and clinicians.                                                                                         | J Am Geriat Soc 51(10): 1398-1403.          |
| Giantomaso, T. et al.            | 2003 | The validity of patient and physician estimates of walking distance.                                                                                                                           | Clin Rehab 17(4): 394-401.                  |
| Hodgev, V. et al.                | 2003 | University of Cincinnati Dyspnea Questionnaire for Evaluation of Dyspnoea during physical and speech activities in patients with chronic obstructive pulmonary disease: a validation analysis. | Clin Physiol Funct Imaging 23(5): 269-274.  |
| Low, G. & Gutman, G.             | 2003 | Couples' ratings of chronic obstructive pulmonary disease patients' quality of life.                                                                                                           | Clin Nurse Res 12(1): 28-48.                |
| Rhee, Y. K. et al.               | 2003 | Erectile dysfunction in patients with chronic obstructive pulmonary disease.                                                                                                                   | Tuberc Respir Dis 54(3): 304-310.           |
| Sant'Anna Ferreira, C. A. et al. | 2003 | Evaluation of Health-Related Quality of Life in Low-Income Patients With COPD Receiving Long-term Oxygen Therapy.                                                                              | CHEST 123(1): 136.                          |
| Seron, P. et al.                 | 2003 | Validation of the chronic respiratory questionnaire in Chilean patients with chronic airflow limitation. [Spanish].                                                                            | Rev Med Chil 131 (11): 1243-1250.           |
| Stahl, E. et al.                 | 2003 | Health-related quality of life, utility, and productivity outcomes instruments: ease of completion by subjects with COPD.                                                                      | Health Qual Life Outcomes 1: 18.            |
| Steele, B. G. et al.             | 2003 | Bodies in motion: monitoring daily activity and exercise with motion sensors in people with chronic pulmonary disease.                                                                         | J Rehabil Res Dev 40(5 Suppl 2): 45-58.     |
| Steele, B. G. et al.             | 2003 | Monitoring daily activity during pulmonary rehabilitation using a triaxial accelerometer.                                                                                                      | J Cardiopul Res 23(2): 139-142.             |
| van der Molen, T. et al.         | 2003 | Development, validity and responsiveness of the Clinical COPD Questionnaire.                                                                                                                   | Health Qual of Life Outcomes 1: 13.         |
| Antonelli Incalzi, R. et al.     | 2004 | Effects of chronic airway disease on health status of geriatric patients.                                                                                                                      | Aging Clin Exp Res 16 (1): 26-33.           |
| Bailey, P. H.                    | 2004 | The Dyspnea-Anxiety-Dyspnea Cycle—COPD Patients' Stories of Breathlessness: "It's Scary /When you Can't Breathe".                                                                              | Qual Health Res 14(6): 760-778.             |
| Bailey, P. H. et al.             | 2004 | COPD-intuition or template: Nurses' stories of acute exacerbations of chronic obstructive pulmonary disease.                                                                                   | J Clin Nurse 13(6): 756-764.                |
| Brazier, J. et al.               | 2004 | A comparison of the EQ-5D and SF-6D across seven patient groups.                                                                                                                               | Health Econom 13(9): 873-884.               |
| Brooks, D. et al.                | 2004 | The development of a helpline for chronic obstructive pulmonary disease (COPD).                                                                                                                | Patient Educ Couns 54(3): 329-336.          |
| Burker, E. J et al.              | 2004 | Religious coping, psychological distress and disability among patients with end-stage pulmonary disease.                                                                                       | J Clin Psychol Med Settings 11(3): 179-193. |
| Covey, M. K. & Larson, J.L.      | 2004 | [Exercise and chronic obstructive lung disease].                                                                                                                                               | Servir 52(5): 245-250.                      |
| Elkington, H. et al.             | 2004 | The last year of life of COPD: A qualitative study of symptoms and services.                                                                                                                   | Resp Med 98 (5): 439-445.                   |
| Elofsson, L. C.& Ohlen, J.       | 2004 | Meanings of being old and living with chronic obstructive pulmonary disease.                                                                                                                   | Palliat Med 18(7): 611-618.                 |
| Garcia-Aymerich, J. et al.       | 2004 | Physical Activity and Its Determinants in Severe Chronic Obstructive Pulmonary Disease.                                                                                                        | Med Sci Sports Exerc 36(10): 1667-1673.     |
| Adams, S. G.                     | 2005 | Managing COPD: how to deal with the most common problems.                                                                                                                                      | J Respir Dis 26(7): 284-289.                |

|                               |      |                                                                                                                                                                    |                                                          |
|-------------------------------|------|--------------------------------------------------------------------------------------------------------------------------------------------------------------------|----------------------------------------------------------|
| Antonelli Incalzi, R. et al.  | 2005 | Construct validity of activities of daily living scale: A clue to distinguish the disabling effects of COPD and congestive heart failure.                          | Chest 127 (3): 830-838.                                  |
| Ashmore, J. A. et al.         | 2005 | Marital adjustment among patients with chronic obstructive pulmonary disease who are participating in pulmonary rehabilitation.                                    | Heart Lung 34(4): 270-278.                               |
| Behnke, M. et al.             | 2005 | Exercise training raises daily activity stronger than predicted from exercise capacity in patients with COPD.                                                      | Resp Med 99(6): 711-717.                                 |
| Belza, B. et al.              | 2005 | Seattle obstructive lung disease questionnaire: Sensitivity to outcomes in pulmonary rehabilitation in severe pulmonary illness.                                   | J Cardiopul Rehab 25(2): 107-114.                        |
| Boot, C. R. L. et al.         | 2005 | Knowledge about asthma and COPD: associations with sick leave, health complaints, functional limitations, adaptation, and perceived control.                       | Patient Educ Couns 59(1): 103-109.                       |
| Donaldson, G. C. et al.       | 2005 | Exacerbations and time spent outdoors in chronic obstructive pulmonary disease.                                                                                    | Am J Resp Crit Care Med 171(5): 446-452.                 |
| Elkington, H et al.           | 2005 | The healthcare needs of chronic obstructive pulmonary disease patients in the last year of life.                                                                   | Palliat Med 19(6): 485-491.                              |
| Hu, J. & Meek, P.             | 2005 | Health-related quality of life in individuals with chronic obstructive pulmonary disease.                                                                          | Heart Lung 34(6): 415-422.                               |
| Incalzi, R. A. et al.         | 2005 | Construct validity of activities of daily living scale: a clue to distinguish the disabling effects of COPD and congestive heart failure.                          | Chest 127(3): 830-838.                                   |
| Kasibowska-Kuzniar, K. et al. | 2005 | [Chronic obstructive pulmonary disease exacerbation--effects on quality of life].                                                                                  | Polskie Archiwum Medycyny Wewnętrznej 114(4): 1010-1015. |
| Lhussier, M. et al.           | 2005 | The SEIQoL and functional status: how do they relate?... Schedule for the Evaluation of Individual Quality of Life.                                                | Scand J Caring Sci 19(4): 403-409.                       |
| Menendez, J. et al.           | 2005 | [Chronic diseases and functional limitation in older adults: a comparative study in seven cities of Latin America and the Caribbean].                              | Rev Panam Salud Publica 17(5-6): 353-361.                |
| Nield, M. et al.              | 2005 | Usefulness of the human activity profile, a functional performance measure, in people with chronic obstructive pulmonary disease.                                  | J Cardiopul Rehab 25(2): 115-121.                        |
| Pang, S. M. C. et al.         | 2005 | Assessing quality of life of patients with advanced chronic obstructive pulmonary disease in the end of life.                                                      | J Palliat Care 21(3): 180-187.                           |
| Robinson, T.                  | 2005 | Living with severe hypoxic COPD: the patients' experience.                                                                                                         | NursTimes 101(7): 38-42.                                 |
| Sandland, C. J. et al.        | 2005 | A profile of daily activity in chronic obstructive pulmonary disease.                                                                                              | J Cardiopul Rehabil 25(3): 181-183.                      |
| Balkissoon, R.                | 2006 | A 26-year-old welder with severe non-reversible obstructive lung disease.                                                                                          | COPD 3(1): 63-67.                                        |
| Braido, F. et al.             | 2006 | Chronic cough and QoL in allergic and respiratory diseases measured by a new specific validated tool-CCIQ.                                                         | J Investig Allergol Clin Immunol 16(2): 110-116.         |
| Cully, J. A. et al.           | 2006 | Quality of life in patients with chronic obstructive pulmonary disease and comorbid anxiety or depression.                                                         | Psychosomatics 47(4): 312-319.                           |
| de Blok, B. M. et al.         | 2006 | The effects of a lifestyle physical activity counseling program with feedback of a pedometer during pulmonary rehabilitation in patients with COPD: A pilot study. | Patient Educ Couns 61(1): 48-55.                         |

|                                    |      |                                                                                                                                                                      |                                                             |
|------------------------------------|------|----------------------------------------------------------------------------------------------------------------------------------------------------------------------|-------------------------------------------------------------|
| Farmer, B. C. et al.               | 2006 | Using pedometers as a strategy to increase the daily steps of older adults with chronic illness: From research to practice.                                          | Home Healthc Nurse 24(7): 449-456.                          |
| Fraser, D. D. et al.               | 2006 | Living with chronic obstructive pulmonary disease: insiders' perspectives.                                                                                           | J Adv Nurs 55(5): 550-558.                                  |
| George, J. et al.                  | 2006 | Development and validation of the Beliefs and Behaviour Questionnaire (BBQ).                                                                                         | Patient Educ Couns 64(1-3): 50-60.                          |
| Kremer, A. M. et al.               | 2006 | Employment and disability for work in patients with COPD: a cross-sectional study among Dutch patients.                                                              | Int Arch Occup Environ Health 80(1): 78-86.                 |
| Lores, V. et al.                   | 2006 | Recording the daily physical activity of COPD patients with an accelerometer: An analysis of agreement and repeatability.                                            | Arch Bronchoneumol 42(12): 627-632.                         |
| Low, G. & Gutman, G.               | 2006 | Examining the role of gender in health-related quality of life: Perceptions of older adults with chronic obstructive pulmonary disease.                              | J Gerontol Nursing 32(11): 42-49.                           |
| McGlone, S. et al.                 | 2006 | Physical activity, spirometry and quality-of-life in chronic obstructive pulmonary disease.                                                                          | COPD 3(2): 83-88.                                           |
| Nguyen, H. Q. et al.               | 2006 | Exercise and symptom monitoring with a mobile device.                                                                                                                | AMIA .. Annual Symposium Proceedings/AMIA Symposium.: 1047. |
| Rutten-van Mölken, M. P. M. et al. | 2006 | Does quality of life of COPD patients as measured by the generic EuroQol Five-Dimension Questionnaire differentiate between COPD severity stages?                    | CHEST 130(4): 1117-1128.                                    |
| Shackell, B. S. et al.             | 2006 | ABS61: A Qualitative study of sleep experiences in subjects with moderate to severe Chronic Obstructive Pulmonary Disease (COPD).                                    | Prim Care Respir J 15(3): 201-202.                          |
| Skumlien, S. et al.                | 2006 | Gender differences in the performance of activities of daily living among patients with chronic obstructive pulmonary disease.                                       | Chron Respir Dis 3(3): 141-148.                             |
| Skumlien, S. et al.                | 2006 | A field test of functional status as performance of activities of daily living in COPD patients.                                                                     | Respir Med 100(2): 316-323.                                 |
| Soyyigit, Ş. et al.                | 2006 | The value of SF-36 questionnaire for the measurement of life quality in chronic obstructive pulmonary disease.                                                       | Tuberk toraks 54(3): 259-266.                               |
| Velloso, M. & Jardim, J.R.         | 2006 | Study of energy expenditure during activities of daily living using and not using body position recommended by energy conservation techniques in patients with COPD. | Chest 130(1): 126-132.                                      |
| Velloso, M. & Jardim, J.R.         | 2006 | Functionality of patients with chronic obstructive pulmonary disease: energy conservation techniques.                                                                | J Brasil Pneumol 32(6): 580-586.                            |
| Verbrugge, L. M. et al.            | 2006 | Views of disability in the United States and Singapore.                                                                                                              | Res Aging 28(2): 216-239.                                   |
| Vidotto, G. et al.                 | 2006 | A new questionnaire specifically designed for patients affected by chronic obstructive pulmonary disease: The Italian Health Status Questionnaire.                   | Respir Med 100(5): 862-870.                                 |
| Yelin, E. et al.                   | 2006 | Work life of persons with asthma, rhinitis, and COPD: A study using a national, population-based sample.                                                             | J Occup Med Toxicol 1(1).                                   |
|                                    | 2006 | Chronic Dyspnea in Patients with COPD.                                                                                                                               | Am J Nurs 106(4): 20-20.                                    |
| Álvarez-Gutiérrez, F. J et al.     | 2007 | Impact of Chronic Obstructive Pulmonary Disease on Activities of Daily Living: Results of the Multicenter EIME Study.                                                | Arch Bronconeumol 43(2): 64-72.                             |
| Arne, M. et al.                    | 2007 | COPD patients' perspectives at the time of diagnosis: A qualitative study.                                                                                           | Prim Care Respir J 16 (4): 215-221.                         |

|                              |      |                                                                                                                                                                            |                                            |
|------------------------------|------|----------------------------------------------------------------------------------------------------------------------------------------------------------------------------|--------------------------------------------|
| Aslani, J. et al.            | 2007 | The socioeconomic status and quality of life in patients with chronic obstructive pulmonary disease.                                                                       | Tanaffos 6 (2): 38-45.                     |
| Casaburi, R.                 | 2007 | 23 New approaches to monitoring.                                                                                                                                           | Respir Med 3(1): 13-14.                    |
| Davis, A. H. T.              | 2007 | Exercise adherence in patients with chronic obstructive pulmonary disease: an exploration of motivation and goals.                                                         | Rehabil Nurs 32(3): 104-110.               |
| Davis, A. H. T. et al.       | 2007 | Reliability and validity of the Exercise Self-Regulatory Efficacy Scale for individuals with chronic obstructive pulmonary disease.                                        | Heart Lung 36(3): 205-216.                 |
| Donesky-Cuenca, D. et al.    | 2007 | Adherence to a home-walking prescription in patients with chronic obstructive pulmonary disease.                                                                           | Heart Lung 36(5): 348-363.                 |
| Garcia-Aymerich, J. et al.   | 2007 | Regular physical activity modifies smoking-related lung function decline and reduces risk of chronic obstructive pulmonary disease: a population-based cohort study.       | Am J Respir Crit Care Med 175(5): 458-463. |
| Kanervisto, M. et al.        | 2007 | Severe chronic obstructive pulmonary disease in a family's everyday life in Finland: perceptions of people with chronic obstructive pulmonary disease and their spouses.   | Nurs Health Sci 9(1): 40-47.               |
| Kara Kaşık, M. & Alberto, J. | 2007 | Family support, perceived self-efficacy and self-care behaviour of Turkish patients with chronic obstructive pulmonary disease.                                            | J Clin Nurs 16(8): 1468-1478.              |
| Kaşıkcı, M. K. & Alberto, J. | 2007 | Family support, perceived self-efficacy and self-care behaviour of Turkish patients with chronic obstructive pulmonary disease.                                            | J Clin Nurs 16(8): 1468-1478.              |
| Lovin, S. et al.             | 2007 | Physiologic responses to walking and cycling in patients with chronic bronchial obstruction.                                                                               | Pneumologia 56(1): 17-23.                  |
| Patel, S. A. et al.          | 2007 | Activity monitoring and energy expenditure in COPD patients: a validation study.                                                                                           | COPD 4(2): 107-112.                        |
| Ramírez Vélez, R.            | 2007 | Quality of life and chronic obstructive pulmonary disease.                                                                                                                 | Revista Ciencias de la Salud 5(1): 90-100. |
| Salepci, B. et al.           | 2007 | The effect of body mass index on functional parameters and quality of life in COPD patients.                                                                               | Tuberkul Toraks 55(4): 342-349.            |
| Scharloo, M. et al.          | 2007 | Illness perceptions and quality of life in patients with chronic obstructive pulmonary disease.                                                                            | J Asthma 44(7): 575-581.                   |
| Vilarnau, E. B. et al.       | 2007 | Evaluation of regular physical activity in COPD patients with an accelerometer and a questionnaire: A pilot study [3].                                                     | Arch Bronconeumol 43(9): 524-525.          |
| Vilaro, J. et al.            | 2007 | Daily living activity in chronic obstructive pulmonary disease: Validation of the Spanish version and comparative analysis of 2 questionnaires. [Spanish].                 | Med Clin 129 (9): 326-332.                 |
| Williams, V. et al.          | 2007 | What really matters to patients living with chronic obstructive pulmonary disease? An exploratory study.                                                                   | Chron Respir Dis 4(2): 77-85.              |
| Yu, D. S. F. et al.          | 2007 | The revolving door syndrome: the Chinese COPD patients' perspectives.                                                                                                      | J Clin Nurs 16(9): 1758-1760.              |
|                              | 2007 | Sleep Disorders: Non-Apnea 12:30 PM - 2:00 PM.                                                                                                                             | CHEST 132(4): 651S-654S.                   |
| Carpes, M. F. et al.         | 2008 | The Brazilian Portuguese version of the London Chest Activity of Daily Living scale for use in patients with chronic obstructive pulmonary disease. [Portuguese, English]. | J Brasil Pneumol 34 (3): 143-151.          |
| Chang, S. H. et al.          | 2008 | Improving activities of daily living for nursing home elder persons in Taiwan.                                                                                             | Nurs Res 57(3): 191-198.                   |

|                              |      |                                                                                                                                                                                          |                                           |
|------------------------------|------|------------------------------------------------------------------------------------------------------------------------------------------------------------------------------------------|-------------------------------------------|
| Chen, K.-H. et al.           | 2008 | Self-management behaviours for patients with chronic obstructive pulmonary disease: a qualitative study.                                                                                 | J Adv Nurs 64(6): 595-604.                |
| Chen, K.-M. et al.           | 2008 | The effects of a Simplified Tai-Chi Exercise Program (STEP) on the physical health of older adults living in long-term care facilities: A single group design with multiple time points. | Int J Nurs Stud 45(4): 501-507.           |
| Chi, T. S. & Man, D.W.K.     | 2008 | Development and validation of an activities of daily living inventory for the rehabilitation of patients with chronic obstructive pulmonary disease.                                     | OTJR 28 (4): 149-159.                     |
| Crawford, B. et al.          | 2008 | Development and validation of a cough and sputum assessment questionnaire.                                                                                                               | Respir Med 102(11): 1545-1555.            |
| Ek, K. & Ternstedt, B.       | 2008 | Living with chronic obstructive pulmonary disease at the end of life: a phenomenological study.                                                                                          | J Adv Nurs 62(4): 470-478.                |
| Gullick, J. & Stainton, M.C. | 2008 | Living with chronic obstructive pulmonary disease: developing conscious body management in a shrinking life-world.                                                                       | J Adv Nurs 64(6): 605-614.                |
| Habraken, J. M. et al.       | 2008 | The silence of patients with end-stage COPD: a qualitative study.                                                                                                                        | Br J Gen Pract 58(557): 844-849.          |
| Hasson, F. et al.            | 2008 | I can not get a breath: experiences of living with advanced chronic obstructive pulmonary disease.                                                                                       | Int J Palliat Nurs 14(11): 526-531.       |
| Hirayama, F. et al.          | 2008 | Physical activity of patients with chronic obstructive pulmonary disease: implications for pulmonary rehabilitation.                                                                     | J Cardiopulm Rehabil Prev 28(5): 330-334. |
| Kaptein, A. A. et al.        | 2008 | Sexuality in patients with asthma and COPD.                                                                                                                                              | Respirat Med 102(2): 198-204.             |
| Kontodimopoulos, N. et al.   | 2008 | Validity of the EuroQoL (EQ-5D) instrument in a Greek general population.                                                                                                                | Value Health 11(7): 1162-1169.            |
| Pinto, J. M. D. S. et al.    | 2008 | Breath of life: Experience with chronic obstructive pulmonary disease in the context of urban poverty in Fortaleza, Ceará State, Brazil.                                                 | Cad Saude Publica 24(12): 2809-2818.      |
| Pitta, F. et al.             | 2008 | Relationship between pulmonary function and physical activity in daily life in patients with COPD.                                                                                       | Respirat Med 102(8): 1203-1207.           |
| Pitta, F. et al.             | 2008 | Validation of the Portuguese version of the London Chest Activity of Daily Living scale (LCADL) in chronic obstructive pulmonary disease patients. [Portuguese, English].                | Rev Port Pneumol 14 (1): 27-47.           |
| Polverino, F. et al.         | 2008 | Advanced stage COPD can be asymptomatic lifelong: A lesson of life.                                                                                                                      | Multidiscip Respir Med 3(3): 228-231.     |
| Sanchez, F. F. et al.        | 2008 | Relationship between disease severity and quality of life in patients with chronic obstructive pulmonary disease.                                                                        | Braz J Med Biol Res 41(10): 860-865.      |
| Sandland, C. J. et al.       | 2008 | Patterns of domestic activity and ambulatory oxygen usage in COPD.                                                                                                                       | Chest 134(4): 753-760.                    |
| Sandlard, C. J. et al.       | 2008 | Patterns of Domestic Activity and Ambulatory Oxygen Usage in COPD.                                                                                                                       | CHEST 134(4): 753-760.                    |
| Scharloo, M. et al.          | 2008 | Illness perceptions, coping and functioning in patients with rheumatoid arthritis, chronic obstructive pulmonary disease and psoriasis.                                                  | J Psychosom Res 44(5): 573-585.           |
| Spence, A. et al.            | 2008 | Active carers: living with chronic obstructive pulmonary disease.                                                                                                                        | Int J Palliat Nurs 14(8): 368-372.        |
| Steele, B. G. et al.         | 2008 | A randomized clinical trial of an activity and exercise adherence intervention in chronic pulmonary disease.                                                                             | Arch Phys Med Rehabil 89(3): 404-412.     |



|                                |      |                                                                                                                                                                         |                                             |
|--------------------------------|------|-------------------------------------------------------------------------------------------------------------------------------------------------------------------------|---------------------------------------------|
| Walker, P. P. et al.           | 2008 | Lower limb activity and its determinants in COPD.                                                                                                                       | Thorax 63(8): 683-689.                      |
| Wen-Miin, L. et al.            | 2008 | An empirical comparison of the WHOQOL-BREF and the SGRQ among patients with COPD.                                                                                       | Qual Life Res 17(5): 793-800.               |
|                                | 2008 | A NEW QUESTIONNAIRE TO ASSESS ACTIVITIES OF DAILY LIVING IN CHRONIC OBSTRUCTIVE PULMONARY DISEASE?                                                                      | Thorax 63: A74-A75.                         |
|                                | 2008 | EXERCISE CAPACITY CORRELATES WITH SUBJECTIVE QUESTIONNAIRES, BUT NOT ACTUAL ACTIVITY IN CHRONIC OBSTRUCTIVE PULMONARY DISEASE PATIENTS.                                 | Thorax 63: A137-A137.                       |
| Al-shair, K. et al.            | 2009 | Development, dimensions, reliability and validity of the novel Manchester COPD fatigue scale.                                                                           | Thorax 64(11): 950-955.                     |
| Ancochea, J. et al.            | 2009 | [The EPI-SCAN survey to assess the prevalence of chronic obstructive pulmonary disease in Spanish 40-to-80-year-olds: protocol summary].                                | Archiv Bronconeumol 45(1): 41-47.           |
| Arne, M. et al.                | 2009 | Physical activity and quality of life in subjects with chronic disease: chronic obstructive pulmonary disease compared with rheumatoid arthritis and diabetes mellitus. | Scand J Prim Health Care 27(3): 141-147.    |
| Baghai-Ravary, R. et al.       | 2009 | Determinants and impact of fatigue in patients with chronic obstructive pulmonary disease.                                                                              | Respirat Med 103(2): 216-223.               |
| Bailey, P. H. et al.           | 2009 | COPD stories of complex causal 'truths' 'Sure I've smoked all my life/but I also put in 37 years at the mine'.                                                          | J Clin Nurs 18(14): 1994-2002.              |
| Bailey, W. C. et al.           | 2009 | Development and validation of the Chronic Obstructive Pulmonary Disease Assessment Questionnaire (COPD-AQ).                                                             | Prim Care Respirat J 18(3): 198-207.        |
| Blinderman, C. D. et al.       | 2009 | Symptom Distress and Quality of Life in Patients with Advanced Chronic Obstructive Pulmonary Disease.                                                                   | J Pain Symptom Manage 38(1): 115-123.       |
| Bonilha, A. G. et al.          | 2009 | Effects of singing classes on pulmonary function and quality of life of COPD patients.                                                                                  | Int J COPD 4 (1): 1-8.                      |
| Buss, A. S. & d. Silva, L.M.C. | 2009 | Comparative study of two quality of life questionnaires in patients with COPD.                                                                                          | J Brasil Pneumol 35(4): 318-324.            |
| Dallas, M. I. et al.           | 2009 | Using pedometers to monitor walking activity in outcome assessment for pulmonary rehabilitation.                                                                        | Chron Respir Dis 6 (4): 217-224.            |
| Dias, A. et al.                | 2009 | Measuring physical activity with sensors: A qualitative study.                                                                                                          | Stud Health Technol Inform. 2009;150:475-9. |
| Garcia-Rio, F. et al.          | 2009 | Daily physical activity in patients with chronic obstructive pulmonary disease is mainly associated with dynamic hyperinflation.                                        | Am J Respir Crit Care Med 180(6): 506-512.  |
| Gardiner, C. et al.            | 2009 | Living with advanced chronic obstructive pulmonary disease: patients concerns regarding death and dying.                                                                | Palliat Med 23(8): 691-697.                 |
| Gillissen, A.                  | 2009 | Chronic obstructive pulmonary disease: Physical activity of patients in connection with severity of disease.                                                            | Med Klin 104(3): 255-256.                   |
| Güler, N. & Akai, Ç.           | 2009 | Quality of life of elderly people aged 65 years and over living at home in Sivas, Turkey.                                                                               | Turk Geriatri Derg 12(4): 181-189.          |
| Hecht, A. et al.               | 2009 | Methodology for using long-term accelerometry monitoring to describe daily activity patterns in COPD.                                                                   | COPD 6(2): 121-129.                         |

|                                       |      |                                                                                                                                                                                                     |                                                                                                             |
|---------------------------------------|------|-----------------------------------------------------------------------------------------------------------------------------------------------------------------------------------------------------|-------------------------------------------------------------------------------------------------------------|
| Iwama, A. M. et al.                   | 2009 | The six-minute walk test and body weight-walk distance product in healthy Brazilian subjects.                                                                                                       | Brazil J Med Biol Res 42(11): 1080-1085.                                                                    |
| Kühl, K. et al.                       | 2009 | COPD disability index (CDI) a new instrument to assess COPD-related disability.                                                                                                                     | Pneumologie 63(3): 136-143.                                                                                 |
| Lahoz, R. et al.                      | 2009 | PRS41 VALIDATION OF THE SPANISH VERSION OF THE “LIVING WITH CHRONIC OBSTRUCTIVE PULMONARY DISEASE (LCOPD)” QUESTIONNAIRE.                                                                           | Value Health 12(7): A306.                                                                                   |
| Langer, D. et al.                     | 2009 | Physical Activity in Daily Life 1 Year After Lung Transplantation.                                                                                                                                  | J Heart Lung Transplant 28(6): 572-578.                                                                     |
| Langer, D. et al.                     | 2009 | Validation of two activity monitors in patients with COPD.                                                                                                                                          | Thorax 64(7): 641-642.                                                                                      |
| Miravittles, M. et al.                | 2009 | Prevalence of COPD in Spain: Impact of undiagnosed COPD on quality of life and daily life activities.                                                                                               | Thorax 64(10): 863-868.                                                                                     |
| Moreira, G. L. et al.                 | 2009 | Portuguese-language version of the Chronic Respiratory Questionnaire: a validity and reproducibility study.                                                                                         | J Brasil Pneumol 35(8): 737-744.                                                                            |
| Norhall, M. F. et al.                 | 2009 | A feasible lifestyle program for early intervention in patients with chronic obstructive pulmonary disease (COPD): A pilot study in primary care.                                                   | Prim Care Respir J 18(4): 306-312.                                                                          |
| Nunes, D. M. et al.                   | 2009 | Impaired sleep reduces quality of life in chronic obstructive pulmonary disease.                                                                                                                    | Lung 187(3): 159-163.                                                                                       |
| Partridge, M. R. et al.               | 2009 | Patient insight into the impact of chronic obstructive pulmonary disease in the morning: an internet survey.                                                                                        | Curr Med Res Opin 25(8): 2043-2048.                                                                         |
| Patel, S. et al.                      | 2009 | Using wearable sensors to monitor physical activities of patients with COPD: A comparison of classifier performance.                                                                                | Wearable and Implantable Body Sensor Networks, 2009. BSN 2009. Sixth International Workshop on. IEEE, 2009. |
| Perez, T. et al.                      | 2009 | Validity, reliability, and responsiveness of a new short Visual Simplified Respiratory Questionnaire (VSRQ) for health-related quality of life assessment in chronic obstructive pulmonary disease. | Int J COPD 4: 9-18.                                                                                         |
| Rodriguez Gonzalez-Moro, J. M. et al. | 2009 | Impact of COPD severity on physical disability and daily living activities: EDIP-EPOC I and EDIP-EPOC II studies.[Erratum appears in Int J Clin Pract. 2010 Jan;64(2):277].                         | Int J Clin Pract 63(5): 742-750.                                                                            |
| Watz, H. et al.                       | 2009 | Physical activity in patients with COPD.                                                                                                                                                            | Eur Respir J 33 (2): 262-272.                                                                               |
| Yoza, Y. et al.                       | 2009 | Development of an activity of daily living scale for patients with COPD: the Activity of Daily Living Dyspnoea scale.                                                                               | Respirology 14(3): 429-435.                                                                                 |
| Zaragoza, J. & Lugli-Rivero, Z.       | 2009 | Development and Validation of a Quality of Life Questionnaire for Patients with Chronic Respiratory Disease (CV-PERC): Preliminary Results. [Spanish].                                              | Arch Bronconeumol 45 (2): 81-86.                                                                            |
| Avşar, G. & Kaşıkçı, M.               | 2010 | Living with chronic obstructive pulmonary disease: a qualitative study.                                                                                                                             | Aust J Adv Nurs 28(2): 46-52.                                                                               |
| Balbi, B. et al.                      | 2010 | Questionnaires for the evaluation of occupational disability in patients with chronic respiratory diseases. [Italian].                                                                              | G Itali Med Lav Ergon 32 (1): 74-78.                                                                        |
| Bausewein, C. et al.                  | 2010 | Individual breathlessness trajectories do not match summary trajectories in advanced cancer and chronic obstructive pulmonary disease: Results from a longitudinal study.                           | Palliat Med 24(8): 777-786.                                                                                 |

|                            |      |                                                                                                                                                                                       |                                                                                                                                             |
|----------------------------|------|---------------------------------------------------------------------------------------------------------------------------------------------------------------------------------------|---------------------------------------------------------------------------------------------------------------------------------------------|
| Bausewein, C. et al.       | 2010 | Understanding Breathlessness: Cross-Sectional Comparison of Symptom Burden and Palliative Care Needs in Chronic Obstructive Pulmonary Disease and Cancer.                             | J Palliat Med 13(9): 1109-1118.                                                                                                             |
| Bentsen, S. B. et al.      | 2010 | Self-efficacy as a predictor of improvement in health status and overall quality of life in pulmonary rehabilitation-An exploratory study.                                            | Patient Educ Couns 81 (1): 5-13.                                                                                                            |
| Benzo, R. P. et al.        | 2010 | Physical activity, health status and risk of hospitalization in patients with severe chronic obstructive pulmonary disease.                                                           | Respiration 80(1): 10-18.                                                                                                                   |
| Berry, M. J. et al.        | 2010 | A lifestyle activity intervention in patients with chronic obstructive pulmonary disease.                                                                                             | Respir Med 104(6): 829-839.                                                                                                                 |
| Borge, C. R. et al.        | 2010 | Association of breathlessness with multiple symptoms in chronic obstructive pulmonary disease.                                                                                        | J Adv Nurs 66(12): 2688-2700.                                                                                                               |
| Chan, A. W. et al.         | 2010 | Effectiveness of a Tai chi Qigong program in promoting health-related quality of life and perceived social support in chronic obstructive pulmonary disease clients.                  | Qual life res 19 (5): 653-664.                                                                                                              |
| DiBonaventura, M. et al.   | 2010 | Quality of life, productivity loss, and resource use among employed adults aged 40 to 64 years with chronic obstructive pulmonary disease (COPD) in the United States (US) workforce. | Value in Health Conference: ISPOR 13th Annual European Congress Prague Czech Republic. Conference Publication: (var.pagings). 13 (7): A326. |
| Esteban, C. et al.         | 2010 | Impact of changes in physical activity on health-related quality of life among patients with COPD.                                                                                    | Eur Respir J 36(2): 292-300.                                                                                                                |
| Federman, A. D. et al.     | 2010 | Development of and Recovery From Difficulty With Activities of Daily Living: An Analysis of National Data.                                                                            | J Aging Health 22(8): 1081-1098.                                                                                                            |
| Fuller, B. G. et al.       | 2010 | Active living-the perception of older people with chronic conditions.                                                                                                                 | Chronic Illn 6(4): 294-305.                                                                                                                 |
| Furlanetto, K. C. et al.   | 2010 | Step counting and energy expenditure estimation in patients with chronic obstructive pulmonary disease and healthy elderly: accuracy of 2 motion sensors.                             | Arch Phys Med Rehabil 91(2): 261-267.                                                                                                       |
| Hill, K. et al.            | 2010 | Measurement properties of the SenseWear armband in adults with chronic obstructive pulmonary disease.                                                                                 | Thorax 65(6): 486-491.                                                                                                                      |
| Kanervisto, M. et al.      | 2010 | COPD, chronic bronchitis and capacity for day-to-day activities: Negative impact of illness on the health-related quality of life.                                                    | Chron Respir Dis 7(4): 207-215.                                                                                                             |
| Kaya, E. et al.            | 2010 | Evaluation of activities of daily living among elderly patients with COPD.                                                                                                            | Turk Geriatri Derg 13(2): 111-116.                                                                                                          |
| Kerkoski, E. et al.        | 2010 | Perception of elderly people with chronic obstructive pulmonary disease on quality of life [Portuguese].                                                                              | Esc Anna Nery 14(4): 825-832.                                                                                                               |
| Lahaije, A. et al.         | 2010 | Physiologic limitations during daily life activities in COPD patients.                                                                                                                | Respir Med 104(8): 1152-1159.                                                                                                               |
| Lopez Varela, M. V. et al. | 2010 | Sex-related differences in COPD in five Latin American cities: the PLATINO study.                                                                                                     | Eur Respir J 36(5): 1034-1041.                                                                                                              |
| Maples, P. et al.          | 2010 | Development and validation of a low-literacy Chronic Obstructive Pulmonary Disease knowledge Questionnaire (COPD-Q).                                                                  | Patient Educ Couns 81(1): 19-22.                                                                                                            |
| Moy, M. L. et al.          | 2010 | Use of pedometer and Internet-mediated walking program in patients with chronic obstructive pulmonary disease.                                                                        | J Rehabil Res Dev 47(5): 485-496.                                                                                                           |

|                             |      |                                                                                                                                                                  |                                                                   |
|-----------------------------|------|------------------------------------------------------------------------------------------------------------------------------------------------------------------|-------------------------------------------------------------------|
| Partridge, M. R. et al.     | 2010 | Development and validation of the Capacity of Daily Living during the Morning questionnaire and the Global Chest Symptoms Questionnaire in COPD.                 | Eur Respir J 36(1): 96-104.                                       |
| Troosters, T. et al.        | 2010 | Physical inactivity in patients with COPD, a controlled multi-center pilot-study.                                                                                | Respir Med 104(7): 1005-1011.                                     |
| Aguilaniu, B. et al.        | 2011 | Disability related to COPD tool (DIRECT): towards an assessment of COPD-related disability in routine practice.                                                  | Int J COPD 6: 387-398.                                            |
| Ai-Min, G. et al.           | 2011 | Validation of the Chinese version of the Functional Performance Inventory Short Form in patients with chronic obstructive pulmonary disease.                     | J Clin Nurs 20(11/12): 1613-1622.                                 |
| Alahmari, A. D. et al.      | 2011 | VALIDATION OF A PEDOMETER TO MEASURE DAILY PHYSICAL ACTIVITIES IN COPD PATIENTS.                                                                                 | Thorax: A86-A86.                                                  |
| Antoniou, S. A.             | 2011 | Health status and chronic obstructive pulmonary disease severity.                                                                                                | Expert Rev Pharmacoecon Outcomes Res 11 (4): 399-401.             |
| Balboa-Castillo, T. et al.  | 2011 | Longitudinal association of physical activity and sedentary behavior during leisure time with health-related quality of life in community-dwelling older adults. | Health Qual Life Outcomes 9(47).                                  |
| Baltzan, M. A. et al.       | 2011 | Fatigue in COPD: Prevalence and effect on outcomes in pulmonary rehabilitation.                                                                                  | Chron Respir Dis 8 (2): 119-128.                                  |
| Bhatti, Z. U. et al.        | 2011 | Development of the Major Life Changing Decisions Profile: A novel approach to measure the long-term impact of disease.                                           | Br J Derm Conference Publication:165: 52.                         |
| Boni, F. et al.             | 2011 | COPD and depression/anxiety.                                                                                                                                     | Ital J Pediatr 5(1 SUPPL. 1): S81-S90.                            |
| Canavan, J. L. et al.       | 2011 | Energy expenditure and physical activity levels during an 8-week pulmonary rehabilitation programme.                                                             | Thorax Conference: Winter Meeting 2011 66: A17.                   |
| Chan, A. W. et al.          | 2011 | Tai chi Qigong improves lung functions and activity tolerance in COPD clients: A single blind, randomized controlled trial.                                      | Complement Ther Med 19(1): 3-11.                                  |
| Crawford, S. R. et al.      | 2011 | Further developments of the living with chronic obstructive pulmonary disease (LCOPD).                                                                           | Value Health Conference Publication: (var.pagings). 14 (7): A497. |
| Donaire-Gonzalez, D. et al. | 2011 | Validation of the Yale Physical Activity Survey in Chronic Obstructive Pulmonary Disease Patients.                                                               | Archiv Bronconeumol 47(11): 552-560.                              |
| Donesky, D. et al.          | 2011 | Determinants of frequency, duration, and continuity of home walking in patients with COPD.                                                                       | Geriatr Nurs 32(3): 178-187.                                      |
| Eisner, M. D. et al.        | 2011 | Development of disability in chronic obstructive pulmonary disease: beyond lung function.                                                                        | Thorax 66(2): 108-114.                                            |
| Ek, K. et al.               | 2011 | Shifting life rhythms: Couples' stories about living together when one spouse has advanced chronic obstructive pulmonary disease.                                | J Palliat Care 27(3): 189-197.                                    |
| Ek, K. et al.               | 2011 | Struggling to retain living space: patients' stories about living with advanced chronic obstructive pulmonary disease.                                           | J Adv Nurs 67(7): 1480-1490.                                      |
| Eliason, G. et al.          | 2011 | Physical activity patterns in patients in different stages of chronic obstructive pulmonary disease.                                                             | COPD 8 (5): 369-374.                                              |
| Esteban, C. et al.          | 2011 | The health, activity, dyspnea, obstruction, age, and hospitalization: prognostic score for stable COPD patients.                                                 | Respir Med 105(11): 1662-1670.                                    |
| Fletcher, M. J. et al.      | 2011 | COPD uncovered: an international survey on the impact of chronic obstructive pulmonary                                                                           | BMC Public Health 11: 612.                                        |

|                           |      |                                                                                                                                                   |                                                                                                                |
|---------------------------|------|---------------------------------------------------------------------------------------------------------------------------------------------------|----------------------------------------------------------------------------------------------------------------|
|                           |      | disease [COPD] on a working age population.                                                                                                       |                                                                                                                |
| Gouzi, F. et al.          | 2011 | Evidence of an early physical activity reduction in chronic obstructive pulmonary disease patients.                                               | Arch Phys Med Rehabil 92(10): 1611-1617.                                                                       |
| Jehn, M. L et al.         | 2011 | Association of daily physical activity assessed by triaxial accelerometry and COPD severity.                                                      | Eur J Cardiovasc Prev Rehabil Conference Publication: 18 (1 SUPPL. 1): S74.                                    |
| Kovelis, D. et al.        | 2011 | Responsiveness of three instruments to assess self-reported functional status in patients with COPD.                                              | COPD 8 (5): 334-339.                                                                                           |
| Lee, H. et al.            | 2011 | Depression and Sleep Disturbance in Patients with Chronic Obstructive Pulmonary Disease.                                                          | Geriatr Nurs 32(6): 408-417.                                                                                   |
| Li, C.-L. et al.          | 2011 | Impact of physical activity on hospitalization in older adults: A nationwide cohort from Taiwan.                                                  | Arch Gerontol Geriatr 53(2): 141-145.                                                                          |
| Li, Z.                    | 2011 | The assessment of COPD patients' living conditions in the urban community.                                                                        | Respirology Conference Publication 16: 126.                                                                    |
| Marín Royo, M. et al.     | 2011 | Physical Activity and its Relationship With the State of Health of Stable COPD Patients.                                                          | Arch Bronconeumol 47(7): 335-342.                                                                              |
| Márquez-Martín, E. et al. | 2011 | Components of physical capacity in patients with chronic obstructive pulmonary disease: relationship with phenotypic expression.                  | Int J COPD 6: 105-112.                                                                                         |
| Mazur, W. et al.          | 2011 | Comparison between the disease-specific Airways Questionnaire 20 and the generic 15D instruments in COPD.                                         | Health Qual Life Outcomes 9(1): 1-9.                                                                           |
| Meng, N.-H. et al.        | 2011 | Reliability and validity of the Taiwan (Mandarin Chinese) version of the chronic respiratory questionnaire.                                       | Qual Life Res 20(10): 1745-1751.                                                                               |
| Nguyen, H. Q. et al.      | 2011 | Validation of the StepWatch device for measurement of free-living ambulatory activity in patients with chronic obstructive pulmonary disease.     | J Nurs Meas 19(2): 76-90.                                                                                      |
| Postolache, O. et al.     | 2011 | Cardio-respiratory and daily activity monitor based on FMCW Doppler radar embedded in a wheelchair, Boston, MA.                                   | 33rd Annual International Conference of the IEEE EMBS Boston, Massachusetts USA, August 30 - September 3, 2011 |
| Rogers, C. et al.         | 2011 | ASSESSING THE VALIDITY OF A HOME ACTIVITY MONITOR IN PATIENTS WITH COPD.                                                                          | Thorax: A85-A86.                                                                                               |
| Shrikrishna, D. et al.    | 2011 | Ultrasound measurement of quadriceps wasting in early chronic obstructive pulmonary disease and its relationship with daily physical activity.    | Thorax Conference Publication 66: A44-A45.                                                                     |
| Simon, K. M. et al.       | 2011 | Relationship between daily living activities (ADL) limitation and the BODE index in patients with chronic obstructive pulmonary disease.          | Rev Bras Fisioter 15(3): 212-218.                                                                              |
| Slinde, F. et al.         | 2011 | Energy expenditure in chronic obstructive pulmonary disease-evaluation of simple measures.                                                        | Eur J Clin Nutr 65(12): 1309-1313.                                                                             |
| Stuart, T. et al.         | 2011 | The relationship of home activity levels to psychological Co-morbidity in COPD.                                                                   | Thorax Conference Publication 66: A85.                                                                         |
| Wan, C. et al.            | 2011 | Development and Validation of the General Module of the System of Quality of Life Instruments for Chronic Diseases and Its Comparison with SF-36. | J Pain and Symptom Manage 42(1): 93-104.                                                                       |

|                           |      |                                                                                                                                                                                |                                                 |
|---------------------------|------|--------------------------------------------------------------------------------------------------------------------------------------------------------------------------------|-------------------------------------------------|
| Waschki, B. et al.        | 2011 | Physical activity is the strongest predictor of all-cause mortality in patients with COPD: A prospective cohort study.                                                         | Chest 140(2): 331-342.                          |
| Willgoss, T. et al.       | 2011 | COPD and anxiety: its impact on patients' lives.                                                                                                                               | Nurs times 107(15-16): 16-19.                   |
| Williams, V. et al.       | 2011 | The importance of movement for people living with chronic obstructive pulmonary disease.                                                                                       | Qual Health Res 21(9): 1239-1248.               |
| Yount, S. E. et al.       | 2011 | Brief, Valid Measures of Dyspnea and Related Functional Limitations in Chronic Obstructive Pulmonary Disease (COPD).                                                           | Value Health (Elsevier Science) 14(2): 307-315. |
| Allen-Ramey, F. C. et al. | 2012 | "Patient characteristics, treatment patterns, and health outcomes among COPD phenotypes."                                                                                      | Int J COPD 7: 779-787.                          |
| Annegarn, J. et al.       | 2012 | Problematic Activities of Daily Life are Weakly Associated With Clinical Characteristics in COPD.                                                                              | J Am Med Dir Assoc 13(3): 284-290.              |
| Annegarn, J. et al.       | 2012 | "Problematic activities of daily life are weakly associated with clinical characteristics in COPD."                                                                            | J Am Med Dir Assoc 13(3): 284-290.              |
| Atkinson, C. et al.       | 2012 | "The addition of a pedometer-guided intervention to pulmonary rehabilitation fails to improve physical activity levels in individuals with COPD."                              | Respirology 17: 64.                             |
| Bauldoff, G. S.           | 2012 | "When breathing is a burden: How to help patients with COPD."                                                                                                                  | Am Nurse Today 7(8): 3p.                        |
| Bausewein, C. et al.      | 2012 | "Development, effectiveness and cost-effectiveness of a new out-patient Breathlessness Support Service: study protocol of a phase III fast-track randomised controlled trial." | BMC Pulm Med 12: 58.                            |
| Bennett, A. V. et al.     | 2012 | Comparison of 7-Day Recall and Daily Diary Reports of COPD Symptoms and Impacts.                                                                                               | Value Health 15(3): 466-474                     |
| Bennett, A. V. et al.     | 2012 | "Comparison of 7-Day Recall and Daily Diary Reports of COPD Symptoms and Impacts."                                                                                             | Value Health 15(3): 466-474.                    |
| Bialon, L. N. & Coke, S.  | 2012 | "A Study on Caregiver Burden: Stressors, Challenges, and Possible Solutions."                                                                                                  | Am J Hosp Palliat Med 29(3): 210-218.           |
| Budhiraja, R. et al.      | 2012 | "Insomnia in patients with COPD."                                                                                                                                              | Sleep 35(3): 369-375.                           |
| Clift, S.                 | 2012 | "Creative arts as a public health resource: moving from practice-based research to evidence-based practice."                                                                   | Perspect Public Health 132(3): 120-127.         |
| Depew, Z. S. et al.       | 2012 | "How many steps are enough to avoid severe physical inactivity in patients with chronic obstructive pulmonary disease?"                                                        | Respirology 17(6): 1026-1027.                   |
| DiBonaventura, M. et al.  | 2012 | "The burden of chronic obstructive pulmonary disease among employed adults."                                                                                                   | Int J COPD 7: 211-219.                          |
| DiBonaventura, M. et al.  | 2012 | "The impact of COPD on quality of life, productivity loss, and resource use among the elderly United States workforce."                                                        | COPD 9(1): 46-57.                               |
| Fried, T. R. et al.       | 2012 | "Caring for the older person with chronic obstructive pulmonary disease."                                                                                                      | JAMA 308(12): 1254-1263.                        |
| Garfield, B. E. et al.    | 2012 | "Stanford Seven-Day Physical Activity Recall questionnaire in COPD."                                                                                                           | Eur Respir J 40(2): 356-362.                    |
| Gautun, H. et al.         | 2012 | Care challenges for informal caregivers of chronically ill lung patients: Results from a questionnaire survey.                                                                 | Scand J Public Health 40(1): 18-24.             |
| Gorzelnik, L. et al.      | 2012 | "Comparison of Recording Positions of Physical Activity in Patients with Severe COPD Undergoing LTOT."                                                                         | COPD 9(5): 528-537.                             |

|                              |      |                                                                                                                                                                                                      |                                             |
|------------------------------|------|------------------------------------------------------------------------------------------------------------------------------------------------------------------------------------------------------|---------------------------------------------|
| Halding, A.-G. & Heggdal, K. | 2012 | "Patients' experiences of health transitions in pulmonary rehabilitation."                                                                                                                           | Nurs Inq 19(4): 345-356.                    |
| Hartman, J. E. et al. et al. | 2012 | "Daily physical activity after bronchoscopic lung volume reduction: a pilot study."                                                                                                                  | Eur Respir J 40(6): 1566-1567.              |
| Howard, K. et al.            | 2012 | "Development of the shortness of breath with daily activities questionnaire (SOBDA)."                                                                                                                | Value Health 15(8): 1042-1050.              |
| Jehn, M. L.                  | 2012 | "Active Voice: Intensity of Daily Ambulation Predicts Life Quality for COPD Patients."                                                                                                               | Sports Med Bull : 1-1.                      |
| Katajisto, M. et al.         | 2012 | "Physical inactivity in COPD and increased patient perception of dyspnea."                                                                                                                           | Int J COPD 7: 743-755.                      |
| Kim, Y. J. et al.            | 2012 | "Patient's perception of symptoms related to morning activity in chronic obstructive pulmonary disease: The SYMBOL study."                                                                           | K J Intern Med 27(4): 426-435.              |
| Kwua-Yun, W. et al.          | 2012 | "Influence of Family Caregiver Caring Behavior on COPD Patients' Self-Care Behavior in Taiwan."                                                                                                      | Respirat Care 57(2): 263-272.               |
| Lim, M. L. et al.            | 2012 | "Is it okay for me to â ?' Assessment of recreational activity risk in patients with chronic lung conditions."                                                                                       | Aust Fam Physician 41(11): 852-854.         |
| McSharry, D. G. et al.       | 2012 | "Sleep quality in chronic obstructive pulmonary disease."                                                                                                                                            | Respirology 17(7): 1119-1124.               |
| Meier, C. et al.             | 2012 | "Dyadic Coping Among Couples with COPD: A Pilot Study."                                                                                                                                              | J Clin Psychol Med Settings 19(3): 243-254. |
| Monteiro, F. et al.          | 2012 | "Obesity and physical activity in the daily life of patients with COPD."                                                                                                                             | Lung 190(4): 403-410.                       |
| Mota, P. et al.              | 2012 | "Longitudinally-assessed sleep and activity variables before, during, and after a COPD exacerbation: An n of 1 study."                                                                               | Chest 1).                                   |
| Mousing, C. A. & Lomborg, K. | 2012 | "Social Solidarity Helps Motivate those Suffering from COPD [Danish]."                                                                                                                               | Sygeplejersken 112(11-12): 62-66.           |
| Moy, M. L. et al.            | 2012 | "A pilot study of an Internet walking program and pedometer in COPD."                                                                                                                                | Respirat Med 106(9): 1342-1350.             |
| Moy, M. L. et al.            | 2012 | "Daily step counts in a US cohort with COPD."                                                                                                                                                        | Respirat Med 106(7): 962-969.               |
| Ng, C. et al.                | 2012 | "The effect of using a wheeled walker on physical activity in people with COPD: Preliminary data."                                                                                                   | Respirology 17: 60.                         |
| Nguyen, H. Q. et al.         | 2012 | "Physical activity patterns of patients with cardiopulmonary illnesses."                                                                                                                             | Arch Phys Med Rehabil 93(12): 2360-2366.    |
| Omach, T. A. et al.          | 2012 | "Disturbed sleep among COPD patients is longitudinally associated with mortality and adverse COPD outcomes."                                                                                         | Sleep Med 13(5): 476-483.                   |
| Patel, K. et al.             | 2012 | "Advance care planning in COPD."                                                                                                                                                                     | Respirology 17(1): 72-78.                   |
| Polatli, M. et al.           | 2012 | Kronik obstruktif akciğer hastalığı{dotless}ni{dotless}n günlük yaşam aktivitelerine etkilerini araştırma{dotless}maya yönelik kesitsel gözlem çalışması{dotless}: Tüberküloz ve Toraks 60(1): 1-12. | KOAH'la yaşam                               |
| Sohanpal, R. et al.          | 2012 | "Learning to manage COPD: A qualitative study of reasons for attending and not attending a COPD-specific self-management programme."                                                                 | Chron Respir Dis 9(3): 163-174.             |

|                            |      |                                                                                                                                                                               |                                          |
|----------------------------|------|-------------------------------------------------------------------------------------------------------------------------------------------------------------------------------|------------------------------------------|
| Tabak, M. et al.           | 2012 | "Telemonitoring of daily activity and symptom behavior in patients with COPD."                                                                                                | Int J Telemed Appl (438736).             |
| Tel, H. et al.             | 2012 | "Care burden and quality of life among the caregivers of patients with COPD"                                                                                                  | Turk Toraks Dergisi 13(3): 87-92.        |
| Thornton Snider, J. et al. | 2012 | "The Disability burden of COPD."                                                                                                                                              | COPD 9(5): 513-521.                      |
| Walters, E. H. et al.      | 2012 | "Clinical diaries in COPD: compliance and utility in predicting acute exacerbations."                                                                                         | Int J COPD 7: 427-435.                   |
| Wang, K. Y. et al.         | 2012 | Influence of family caregiver caring behavior on COPD Patients' self-care behavior in Taiwan.                                                                                 | Respirat Care 57(2): 263-272.            |
| Waschki, B. et al.         | 2012 | Physical activity monitoring in COPD: Compliance and associations with clinical characteristics in a multicenter study.                                                       | Respirat Med 106(4): 522-530.            |
| Willgoss, T. G. et al.     | 2012 | "Everything was spiraling out of control": Experiences of anxiety in people with chronic obstructive pulmonary disease."                                                      | Heart Lung 41(6): 562-571.               |
| Park H.Y.                  | 2012 | Inhaled corticosteroids for chronic obstructive pulmonary disease.                                                                                                            | Br Med J 345: 39-43.                     |
| Boots R.J.                 | 2012 | The tyranny of distance: telemedicine for the critically ill in rural Australia.                                                                                              | Anaesth Intensive Care 2012; 40: 871-874 |
| Albores, J. et al.         | 2013 | "The use of a home exercise program based on a computer system in patients with chronic obstructive pulmonary disease."                                                       | J Cardiopulm Rehabil Prev 33(1): 47-52.  |
| Ali Zohal, M. et al.       | 2013 | "Daytime Sleepiness and Quality of Sleep in Patients with COPD Compared to Control Group."                                                                                    | Glob J Health Sci 5(3): 150-155.         |
| Alkhuja, S.                | 2013 | "Everything was spiraling out of control: Experiences of anxiety in people with chronic obstructive pulmonary disease."                                                       | Heart Lung 42(1): 82.                    |
| Crawford, G. B. et al.     | 2013 | "Unmet needs of people with end-stage chronic obstructive pulmonary disease: recommendations for change in Australia."                                                        | Int Med J 43(2): 183-190.                |
| DePew, Z. S. et al.        | 2013 | "Screening for severe physical inactivity in chronic obstructive pulmonary disease: the value of simple measures and the validation of two physical activity questionnaires." | Chron Respirat Dis 10(1): 19-27.         |
| Fullwood, C. et al.        | 2013 | "Patients' experiences of shared decision making in primary care practices in the United kingdom."                                                                            | Med Decis Making 33(1): 26-36.           |
| Hartman, J. E. et al.      | 2013 | "Self-efficacy for physical activity and insight into its benefits are modifiable factors associated with physical activity in people with COPD: A mixed-methods study."      | J Physiother 59(2): 117-124.             |
| Huniche, L. et al.         | 2013 | "Patients' use of self-monitored readings for managing everyday life with COPD: a qualitative study."                                                                         | Telemed J E-Health 19(5): 396-402.       |
| Moy, M. L. et al.          | 2013 | "Daily step count predicts acute exacerbations in a US cohort with COPD."                                                                                                     | PLoS ONE 8(4): e60400.                   |
| Sullivan, S. D. et al.     | 2013 | "Assessment of nighttime and early morning symptoms among patients with chronic obstructive pulmonary disease."                                                               | Value Health 16 (3): A238-A239.          |

**Table OS3.3:** Failed to report a Free Living Activity



### Failed to Report Frequency and/or Duration

| Author                     | Year | Title                                                                                                                                                   | Citation                                       |
|----------------------------|------|---------------------------------------------------------------------------------------------------------------------------------------------------------|------------------------------------------------|
| Sexton, D. L. et al.       | 1988 | Living with a Chronic Illness the Experience of Women with Chronic Obstructive Pulmonary Disease (COPD).                                                | West J Nurs Res 10(1): 26-44.                  |
| Leidy, N. K. & Haase, J.E. | 1996 | Functional performance in people with chronic obstructive pulmonary disease: a qualitative analysis.                                                    | ANS Adv Nurs Sci 18(3): 77-89.                 |
| Partridge, M. R. et al.    | 2001 | What time of day do patients take steroid tablets?                                                                                                      | Resp Med 95 (1): 90-91.                        |
| Seamark, D. A. et al.      | 2004 | Living with severe chronic obstructive pulmonary disease (COPD): Perceptions of patients and their carers. An interpretative phenomenological analysis. | Palliat Med 18 (7): 619-625.                   |
| Orbon, K. H. et al.        | 2005 | Employment status and quality of life in patients with chronic obstructive pulmonary disease.                                                           | Int Arch Occup Environ Health 78 (6): 467-474. |
| Belfer, M. H.              | 2007 | The impact of exercise on activities of daily living and quality of life: a primary care physician's perspective.                                       | COPD 4(3): 289-291.                            |
| Garcia-Aymerich, J. et al. | 2009 | Physical activity and clinical and functional status in COPD.                                                                                           | Chest 136(1): 62-70.                           |
| Guo, A.-M. et al.          | 2011 | Validation of the Chinese version of the Functional Performance Inventory Short Form in patients with chronic obstructive pulmonary disease.            | J Clin Nurs 20(11-12): 1613-1622.              |
| McLaughlin, D. et al.      | 2011 | Living with stairs: Functioning in a large cohort of older Australian adults.                                                                           | J Am Geriatr Soc 59 (8): 1560-1562.            |
| Norweg, A. et al.          | 2011 | Outcome measurement for COPD: Reliability and validity of the Dyspnea Management Questionnaire.                                                         | Respir Med 105(3): 442-453.                    |
| Pachana, N. A. et al.      | 2011 | The effect of having a partner on activities of daily living in men and women aged 82–87 years.                                                         | Maturitas 68(3): 286-290.                      |

**Table OS3.4:** Failed to Report Frequency and/or Duration

### Foreign Language manuscript – unable to source translation

| Author                   | Year | Title                                                                                           | Citation                                          |
|--------------------------|------|-------------------------------------------------------------------------------------------------|---------------------------------------------------|
| Bum, A.                  | 1988 | [Chronic obstructive pulmonary disease from the viewpoint of a specialist practice].            | Praxis und Klinik der Pneumologie 42(7): 525-526. |
| Lin, C. C. & Huang, W.C. | 1992 | [Sleep quality and nocturnal hypoxemia in patients with chronic obstructive pulmonary disease]. | J Formos Med Assoc 91 Suppl 3: S232-238.          |
| Kurihara, N. et al.      | 1995 | [Exercise tolerance and chronic obstructive pulmonary disease].                                 | Nihon Naika Gakkai 84(5): 726-729.                |
| Nakata, K. & Tsuboi, E.  | 2000 | [Chronic obstructive pulmonary disease and physical activity].                                  | Nippon Rinsho 58 Suppl: 510-514.                  |
| Nagao, K.                | 2001 | [Exercise tolerance in COPD].                                                                   | Nippon Naika Gakkai 90(5): 801-806.               |

|                      |      |                                                                                                                                                                        |                                                 |
|----------------------|------|------------------------------------------------------------------------------------------------------------------------------------------------------------------------|-------------------------------------------------|
| Kida, K.             | 2003 | [Chronic obstructive pulmonary disease (COPD): problems and the solution in elderly patients].                                                                         | Nippon Ronen 40(5): 455-458.                    |
| Bang, S.-Y.          | 2007 | [Influencing factors on fatigue in patients with chronic obstructive pulmonary disease].                                                                               | Taehan Kanho Hakhoe chi 37(6): 855-862.         |
| Shen, N. et al.      | 2008 | Patient' s perspective of chronic obstructive pulmonary disease in Yanqing county of Beijing.                                                                          | Zhonghua jie he he hu xi za zhi 31(3): 206-208. |
| Akashiba, T.         | 2009 | Sleep disordered breathing in COPD. [Japanese].                                                                                                                        | Kokyu To Junkan 57 (8): 851-855.                |
| Magnussen, H. et al. | 2009 | [Measurement of physical activity in patients with chronic obstructive pulmonary disease].                                                                             | Med Klin 104(4): 303-308.                       |
| Satoh, H. et al.     | 2009 | [Effect of proactive use of inhaled procaterol on dyspnea in daily activities and quality of life in patients with chronic obstructive pulmonary disease]. [Japanese]. | Nihon Kokyuki Gakkai zasshi 47 (9): 772-780.    |
| Akashiba, T.         | 2010 | Sleep disordered breathing in patients with COPD. [Japanese].                                                                                                          | Kokyu To Junkan 58 (2): 159-164.                |
| Nell, C. et al.      | 2011 | Chronic pulmonary diseases: Point of view of partners and their assessments with regard to the effects of lung sports.                                                 | Pneumologie 65(12): 751-755.                    |
| Tel, H. et al.       | 2012 | KOAH'LI hastalarin bakim vericilerinde bakim yuku ve yasam kalitesi."                                                                                                  | Turk Toraks Dergisi 13(3): 87-92.               |

**Table OS3.5:** Foreign Language manuscript – unable to source translation

#### Unable to locate manuscript as cited

| Author                     | Year | Title                                                                                                                                                                        | Citation                                                     |
|----------------------------|------|------------------------------------------------------------------------------------------------------------------------------------------------------------------------------|--------------------------------------------------------------|
| Hanson, E. I.              | 1982 | Effects of chronic lung disease on life in general and on sexuality: Perceptions of adult patients.                                                                          | Heart Lung 11(5): 435-441.                                   |
| Barchfeld, T. et al.       | 1999 | [Evaluation of daily activity in patients with COPD].                                                                                                                        | Med Klin 94(1 Spec No): 93-95.                               |
| Atasever, A. & Erdinc, E.  | 2003 | [Quality of life in COPD].                                                                                                                                                   | Tuberkuloz ve Toraks 51(4): 446-455.                         |
| Meng, W. P. & Tan, P.      | 2004 | Evaluation of ability of daily living and anlysis of its influencing factors in 986 elderly people from 10 military entertainment centers for retired cadres of Fuzhou area. | Chinese Journal of Clinical Rehabilitation 8(30): 6572-6574. |
|                            | 2005 | [Therapy of COPD. Reducing air trapping in the lung--improving physical capacity].                                                                                           | MMW Fortschritte der Medizin 147(19): 54-55.                 |
|                            | 2006 | [Yolande, an ordinary day of a respiratory insufficiency patient].                                                                                                           | Soins; La Revue de Reference Infirmiere(710): 52-53.         |
| Ando, M. et al.            | 2007 | [Which parameters should be chosen to evaluate daily activities of the patients with chronic lung disease?].                                                                 | Nihon Kokyuki Gakkai Zasshi 45(2): 135-145.                  |
| Balcells Vilarnau et al.   | 2007 | [Evaluation of regular physical activity in COPD patients with an accelerometer and a questionnaire: a pilot study].                                                         | Archiv Bronconeumol 43(9): 524-525.                          |
| Bak-Drabik, K. & Ziora, D. | 2010 | [The impact of socioeconomic status on the quality of life in patients with chronic obstructive pulmonary disease].                                                          | Pneumonol Alergol Polska 78(1): 3-13.                        |

|                            |      |                                                                                        |                                                   |
|----------------------------|------|----------------------------------------------------------------------------------------|---------------------------------------------------|
| Barua, A. et al.           | 2011 | Functional impairments: A study in elderly individuals.                                | J Int Med Sci Acad 24 (2): 61-63.                 |
| Narasimhadevara, V. et al. | 2011 | Are COPD patients with higher depression scores more likely to be physically inactive? | Chest. Conference: CHEST 140(4 MEETING ABSTRACT). |

**Table OS3.6:** Unable to locate manuscript as cited

**Excluded after unsuccessful attempts to contact primary author**

| Author                 | Year | Title                                                                                                                    | Citation                                |
|------------------------|------|--------------------------------------------------------------------------------------------------------------------------|-----------------------------------------|
| Bossenbroek, L. et al. | 2009 | Cross-sectional Assessment of Daily Physical Activity in Chronic Obstructive Pulmonary Disease Lung Transplant Patients. | J Heart Lung Transplant 28(2): 149-155. |

**Table OS3.7:** Excluded after unsuccessful attempts to contact primary author

**Tables OS3.1 – OS3.7:** Exclusions based on Full text review.

Online Supplement - Appraisal of bias

| Qualitative Research            |             |          |            |          |          |                 |              |          |            |              |
|---------------------------------|-------------|----------|------------|----------|----------|-----------------|--------------|----------|------------|--------------|
| Author                          | Year        | Purpose  | Literature | Design   | Sample   | Data Collection | Analysis     | Rigour   | Conclusion | Score        |
| Guthrie, S. J. [43]             | 2001        | 1        | 0          | 0        | 0        | 0               | 0            | 1        | 1          | 4.8/8        |
| Barnett, M [41]                 | 2005        | 1        | 1          | 0        | 0        | 0               | 0            | 1        | 1          | 6.3/8        |
| Odencrants, S. [44]             | 2005        | 1        | 1          | 0        | 0        | 0               | 1            | 1        | 1          | 6.6/8        |
| Shackell, B. S. [19]            | 2007        | 1        | 1          | 1        | 0        | 0               | 0            | 1        | 1          | 7.1/8        |
| Cooney A.L [42]                 | 2013        | 1        | 1          | 0        | 0        | 0               | 1            | 1        | 1          | 6.7/8        |
| Quantitative Research           |             |          |            |          |          |                 |              |          |            |              |
| Author                          | Year        | Purpose  | Literature | Design   | Sample   | Outcomes        | Intervention | Results  | Conclusion | Score        |
| Köseoglu, N. [39]               | 2005        | 1        | 0          | 1        | 0        | 0               | 0            | 0        | 1          | 5.1/8        |
| Pitta, F. [30]                  | 2005a       | 1        | 1          | 1        | 0        | 1               | 0            | 0        | 1          | 7.1/8        |
| Pitta, F. [31]                  | 2005b       | 1        | 1          | 1        | 1        | 1               | 0            | 1        | 1          | 7.7/8        |
| Garcia-Aymerich, J. [37]        | 2006        | 1        | 1          | 1        | 0        | 0               | 1            | 1        | 1          | 6.0/8        |
| Pitta, F. [29]                  | 2006        | 1        | 1          | 1        | 0        | 1               | 0            | 0        | 1          | 7.1/8        |
| Pitta, F. [28]                  | 2008        | 1        | 1          | 1        | 0        | 1               | 0            | 1        | 1          | 7.3/8        |
| Hernandes, N. A. [24]           | 2009        | 1        | 1          | 1        | 0        | 1               | 0            | 0        | 1          | 6.7/8        |
| Moy, M. L. [20]                 | 2009        | 1        | 1          | 1        | 0        | 0               | 0            | 0        | 1          | 6.3/8        |
| Pitta, F. [27]                  | 2009        | 1        | 1          | 1        | 0        | 0               | 1            | 0        | 1          | 6.9/8        |
| Breyer, M. K. [23]              | 2010        | 1        | 1          | 1        | 0        | 0               | 0            | 1        | 1          | 6.3/8        |
| Jehn, M. [34]                   | 2011        | 1        | 1          | 1        | 1        | 0               | 0            | 0        | 1          | 6.9/8        |
| Langer, D. [25]                 | 2011        | 1        | 1          | 1        | 0        | 0               | 0            | 0        | 1          | 6.1/8        |
| Mantoani, L. C. [26]            | 2011        | 1        | 1          | 1        | 0        | 0               | 0            | 0        | 1          | 6.6/8        |
| Montes De Oca, M. [40]          | 2011        | 1        | 1          | 1        | 0        | 0               | 1            | 1        | 1          | 6.0/8        |
| Borges R.C. [22]                | 2012        | 1        | 1          | 1        | 1        | 0               | 1            | 1        | 1          | 7.0/8        |
| Dacosta Dibonaventura, M. [36]  | 2012        | 1        | 1          | 1        | 0        | 1               | 0            | 1        | 1          | 7.3/8        |
| Jehn, M. [33]                   | 2012        | 1        | 1          | 1        | 1        | 1               | 0            | 0        | 1          | 7.4/8        |
| Polatli M. [38]                 | 2012        | 1        | 1          | 1        | 0        | 0               | 0            | 0        | 1          | 5.8/8        |
| Vitorasso R. [32]               | 2012        | 1        | 1          | 1        | 0        | 0               | 0            | 0        | 1          | 6.6/8        |
| Nunes D.M. [35]                 | 2013        | 1        | 1          | 1        | 0        | 0               | 0            | 0        | 1          | 6.1/8        |
| <b>Donaire-Gonzalez, D. [5]</b> | <b>2013</b> | <b>1</b> | <b>1</b>   | <b>1</b> | <b>1</b> | <b>1</b>        | <b>1</b>     | <b>1</b> | <b>1</b>   | <b>6.6/8</b> |

0: Insufficiently Report 1 Sufficiently Reports 0 Partially reports

**Table OS4:** Appraisal of bias – Individual study results.

**Online Supplement - Individual Study Outcome data**

| Author              | Measurement Tool/s                                | Activity                    | Frequency/Duration       |
|---------------------|---------------------------------------------------|-----------------------------|--------------------------|
| <b>2001</b>         |                                                   |                             |                          |
| Guthrie, S. J. [43] | Qualitative Interview (Phenomological)            | Medical appointments        | Once per week            |
|                     |                                                   | Bathing                     | Once daily               |
|                     |                                                   | Medical appointment/Chemist | Twice monthly            |
|                     |                                                   | Shopping                    | Once per fortnight       |
|                     |                                                   | Visiting friends            | 4 times per week         |
|                     |                                                   | Leaving house               | Once per week            |
|                     |                                                   | Religion                    | Once per month           |
|                     |                                                   | Shopping                    | Four times per week      |
| <b>2005</b>         |                                                   |                             |                          |
| Barnett, M. [41]    | Qualitative Interview (Phenomological)            | Showering                   | 3 times per week         |
|                     |                                                   | Showering                   | 45 – 90 mins per episode |
|                     |                                                   | Strip wash                  | 4 times per week         |
|                     |                                                   | Bathing                     | 3 times per week         |
|                     |                                                   | Walking                     | 1 time per 6 month       |
| Köseoğlu, N. [39]   | Questionnaire (IIEF*)                             | Sexual intercourse          | 1.5 (0.9) times per week |
| Odencrants, S. [44] | Qualitative Interview (Phenomological)            | Eating - dinner             | 1 hour per night         |
|                     |                                                   | Night time waking           | 1 per night              |
|                     |                                                   | Sitting                     | 1 hour after meals       |
| Pitta, F. [30]      | Activity monitor (Dynaport) & Diary (Self-report) | Walking (dynaport)          | 45 (20) minutes daily    |
|                     |                                                   | Walking (self reported)     | 66 (47) minutes daily    |
|                     |                                                   | Cycling (dynaport)          | 4 (9) minutes daily      |
|                     |                                                   | Cycling (self reported)     | 3 (9) minutes daily      |
|                     |                                                   | Standing (dynaport)         | 191 (85) minutes daily   |
|                     |                                                   | Standing (self report)      | 146 (71) minutes daily   |
|                     |                                                   | Sitting (dynaport)          | 390 (161) minutes daily  |
|                     |                                                   | Sitting (self report)       | 375 (134) minutes daily  |
|                     |                                                   | Lying (dynaport)            | 88 (141) minutes daily   |
|                     |                                                   | Lying (self report)         | 83 (83) minutes daily    |
| Pitta, F. [31]      | Activity monitor (Dynaport)                       | Walking                     | 44 (26) minutes daily    |
|                     |                                                   | Cycling                     | 4 (8) minutes daily      |
|                     |                                                   | Standing                    | 191 (99) minutes daily   |
|                     |                                                   | Sitting                     | 374 (139) minutes daily  |

|                          |                                                          |                               |                                                                   |
|--------------------------|----------------------------------------------------------|-------------------------------|-------------------------------------------------------------------|
|                          |                                                          | Lying                         | 87 (97) minutes daily                                             |
| 2006                     |                                                          |                               |                                                                   |
| Garcia-Aymerich, J. [37] | Questionnaire (Self-reported activity)                   | Cycling - winter              | 77.5% of respondents reported no cycling per week                 |
|                          |                                                          | Cycling - winter              | 9.5% of respondents reported cycling for <0.5 hours per week      |
|                          |                                                          | Cycling - winter              | 7.6% of respondents reported cycling for <0.5 - 1 hours per week  |
|                          |                                                          | Cycling - winter              | 4.1% of respondents reported cycling for 1 - 2 hours per week     |
|                          |                                                          | Cycling - winter              | 1.3% of respondents reported cycling for > 2 hours per week       |
|                          |                                                          | Cycling - summer              | 62.5% of respondents reported no cycling per week                 |
|                          |                                                          | Cycling - summer              | 11.5% of respondents reported cycling for <0.5 hours per week     |
|                          |                                                          | Cycling - summer              | 12.3% of respondents reported cycling for <0.5 - 1 hours per week |
|                          |                                                          | Cycling - summer              | 8.2% of respondents reported cycling for 1 - 2 hours per week     |
|                          |                                                          | Cycling - summer              | 5.5% of respondents reported cycling for > 2 hours per week       |
| Pitta, F. [29]           | Activity monitor (Dynaport)                              | Walking                       | 57 minutes daily                                                  |
|                          |                                                          | Cycling                       | 0 minutes daily                                                   |
|                          |                                                          | Standing                      | 208 minutes daily                                                 |
|                          |                                                          | Sitting                       | 338 minutes daily                                                 |
|                          |                                                          | Lying                         | 39 minutes daily                                                  |
| 2007                     |                                                          |                               |                                                                   |
| Shackell, B. S. [19]     | Qualitative Interview (Semi Structured)                  | Lying awake (sleep latency)   | 42 (33) minutes nightly                                           |
|                          |                                                          | Sleep                         | 5 hours daily                                                     |
|                          |                                                          | Going to the bathroom         | 3 episodes per night                                              |
| 2008                     |                                                          |                               |                                                                   |
| Pitta, F. [28]           | Activity monitor (Dynaport)                              | Walking                       | 55 (26) minutes daily                                             |
|                          |                                                          | Standing                      | 227 (92) minutes daily                                            |
|                          |                                                          | Sitting                       | 355 (121) minutes daily                                           |
|                          |                                                          | Lying                         | 77 (87) minutes daily                                             |
| 2009                     |                                                          |                               |                                                                   |
| Hernandes, N. A. [24]    | Activity monitor (Dynaport)                              | Walking                       | 55 (33) minutes daily                                             |
|                          |                                                          | Sitting                       | 294 (114) minutes daily                                           |
| Moy, M. L. [20]          | Questionnaire (Self-report) & Activity monitor (Actiped) | Walking > 5 mins              | 5.32 times per week                                               |
|                          |                                                          | Walking in grocery store      | 2.76 times per week                                               |
|                          |                                                          | Unloading groceries from car  | 3 times per week                                                  |
|                          |                                                          | Walking in mall               | 1.7 times per week                                                |
|                          |                                                          | Errands (post office)         | 3 times per week                                                  |
|                          |                                                          | Medical appointments          | 1 times per week                                                  |
|                          |                                                          | Visiting relatives or friends | 4.1 times per week                                                |
|                          |                                                          | Preparing meals               | 4.7 times per week                                                |

|                           |                                         |                                       |                                                         |
|---------------------------|-----------------------------------------|---------------------------------------|---------------------------------------------------------|
|                           |                                         | Climbing stairs                       | 4.8 times per week                                      |
|                           |                                         | Digging in the garden                 | 2.1 times per week                                      |
|                           |                                         | Gym (exercise)                        | 0.9 times per week                                      |
|                           |                                         | Exercise (home)                       | 1.5 times per week                                      |
|                           |                                         | Collecting Mail from mailbox          | 3.2 times per week                                      |
|                           |                                         | Housework                             | 3.4 times per week                                      |
|                           |                                         | Travel in car, bus or train           | 5.7 times per week                                      |
| Pitta, F. [27]            | Activity monitor (Dynaport)             | Walking (Brazilian)                   | 56 (32) minutes daily                                   |
|                           |                                         | Sitting (Brazilian)                   | 269 (109) minutes daily                                 |
|                           |                                         | Standing (Brazilian)                  | 246 (122) minutes daily                                 |
|                           |                                         | Lying (Brazilian)                     | 119 (110) minutes daily                                 |
|                           |                                         | Walking (Austrian)                    | 40 (36) minutes daily                                   |
|                           |                                         | Sitting (Austrian)                    | 388 (208) minutes daily                                 |
|                           |                                         | Standing (Austrian)                   | 192 (182) minutes daily                                 |
| Lying (Austrian)          | 98 (116) minutes daily                  |                                       |                                                         |
| 2010                      |                                         |                                       |                                                         |
| Breyer, M. K. [23]        | Activity monitor (Dynaport)             | Walking                               | 42.3 (36.5) minutes daily                               |
|                           |                                         | Standing                              | 222 (169) minutes daily                                 |
|                           |                                         | Sitting                               | 362 (195) minutes daily                                 |
|                           |                                         | Lying                                 | 88.7 (91.5) minutes daily                               |
| 2011                      |                                         |                                       |                                                         |
| Jehn, M. [34]             | Activity monitor (Aipermon)             | Walking                               | 53.5 (29.5) minutes daily                               |
|                           |                                         | Walking                               | 51 (27.5) minutes daily                                 |
|                           |                                         | Fast walking                          | 2.4 (5.6) minutes daily                                 |
| Langer, D. [25]           | Activity monitor (Dynaport & Sensewear) | Walking                               | 32 (21) minutes daily                                   |
|                           |                                         | Standing                              | 189 (84) minutes daily                                  |
|                           |                                         | Sitting                               | 378 (128) minutes daily                                 |
|                           |                                         | Lying                                 | 110 (113) minutes daily                                 |
| Mantoani, L. C. [26]      | Activity monitor (Dynaport & Sensewear) | Walking                               | 51 minutes daily                                        |
|                           |                                         | Standing                              | 237 minutes daily                                       |
| Montes De Oca, M. [40]    | Questionnaire (PLATINO*)                | Employment                            | 5.85 working days (average 8.97 hours) per week         |
| 2012                      |                                         |                                       |                                                         |
| Borges R.C. [22]          | Activity monitor (Dynaport)             | Lying                                 | 30.7 (20.2)% of daily wear time 221.04 (145.44) minutes |
|                           |                                         | Sitting                               | 38.9 (17.6)% of daily wear time 280.08 (126.72) minutes |
|                           |                                         | Standing                              | 22.7 (14)% of daily wear time 163.44 (100.8) minutes    |
|                           |                                         | Walking                               | 6.1 (4.4)% of daily wear time 43.92 (31.68) minutes     |
| Dacosta Dibonaventura, M. | Questionnaire (WPAIQ*)                  | Presenteeism (impaired while working) | 4.75 hours weekly                                       |

|                          |                                         |                                                    |                            |
|--------------------------|-----------------------------------------|----------------------------------------------------|----------------------------|
| [36]                     |                                         | Absenteeism (Sick leave)                           | 1.08 hours weekly          |
|                          |                                         | Provider (doctor) visits                           | 6.24 times annually        |
|                          |                                         | Emergency room presentations                       | 0.27 times annually        |
|                          |                                         | Hospitalizations                                   | 0.19 times annually        |
| Jehn, M. [33]            | Activity monitor (Aipermon)             | Walking                                            | 51 (27.5) minutes daily    |
|                          |                                         | Fast walking                                       | 2.4 (5.6) minutes daily    |
|                          |                                         | Total walking                                      | 53.5 (29.5) minutes daily  |
| Polatli M.C. [38]        | Interview (Telephone based)             | Laying down                                        | 9.3 (2.7) hours daily      |
|                          |                                         | Watching TV/listening to music                     | 5 (3.1) hours daily        |
|                          |                                         | Time outside of house and/or work                  | 2.2 (3.8) hours daily      |
|                          |                                         | Outside house                                      | 3.4 (2.8) hours daily      |
|                          |                                         | Work/working                                       | 2.2 (3.8) hours daily      |
|                          |                                         | Reading (newspaper/book)                           | 1 (1.3) hours daily        |
|                          |                                         | Chores                                             | 0.6 (1.5) hours daily      |
| Vitorasso R.C.A [32]     | Activity monitor (Dynaport & Sensewear) | Walking                                            | 53 minutes daily           |
|                          |                                         | Standing                                           | 196 minutes daily          |
|                          |                                         | Sitting                                            | 307 minutes daily          |
|                          |                                         | Cleaning (cupboards)                               | 10 minutes per day         |
| 2013                     |                                         |                                                    |                            |
| Cooney A.L. [42]         | Qualitative Interview (Grounded theory) | Dancing                                            | 2 dances per night         |
| Donaire-Gonzalez, D. [5] | Yale Physical Activity Questionnaire    | Household activities (Non adherence to PA)         | 8.1(8.1) hours per week    |
|                          |                                         | Work activities (Non adherence to PA)              | 3.7 (11.8) hours per week  |
|                          |                                         | Leisure activities (Non adherence to PA)           | 11.6 (11) hours per week   |
|                          |                                         | Yard work/gardening (Non adherence to PA)          | 1.1 (4.3) hours per week   |
|                          |                                         | Caretaking (Non adherence to PA)                   | 0.9 (4.5) hours per week   |
|                          |                                         | Exercise (Non adherence to PA)                     | 0.7 (1.5) hours per week   |
|                          |                                         | Recreational activities (Non adherence to PA)      | 9 (10) hours per week      |
|                          |                                         | Household activities (Adherence to PA-bouts)       | 6.3 (7.1) hours per week   |
|                          |                                         | Work activities (Adherence to PA-bouts)            | 2.4 (9.7) hours per week   |
|                          |                                         | Leisure activities (Adherence to PA-bouts)         | 16.2 (13.4) hours per week |
|                          |                                         | Yard work/gardening (Adherence to PA-bouts)        | 4.1 (6.9) hours per week   |
|                          |                                         | Caretaking (Adherence to PA-bouts)                 | 0 (0) hours per week       |
|                          |                                         | Exercise (Adherence to PA-bouts)                   | 2.5 (7.6) hours per week   |
|                          |                                         | Recreational activities (Adherence to PA-bouts)    | 9.6 (9.6) hours per week   |
|                          |                                         | Household activities (Adherence to PA-consecutive) | 11.5 (12.1) hours per week |
|                          |                                         | Work activities (Adherence to PA- consecutive)     | 5.7 (15.2) hours per week  |



|                 |                                    |                                                        |                                |
|-----------------|------------------------------------|--------------------------------------------------------|--------------------------------|
|                 |                                    | Leisure activities (Adherence to PA- consecutive)      | 16.4 (12.3) hours per week     |
|                 |                                    | Yard work/gardening (Adherence to PA- consecutive)     | 3 (10.2) hours per week        |
|                 |                                    | Caretaking (Adherence to PA- consecutive)              | 0.9 (3.5) hours per week       |
|                 |                                    | Exercise (Adherence to PA- consecutive)                | 1.5 (3.5) hours per week       |
|                 |                                    | Recreational activities (Adherence to PA- consecutive) | 10.9 (7.3) hours per week      |
| Nunes D.M. [35] | Activity monitor<br>(Motionlogger) | Sleep – night time                                     | 280.84 (110.6) minutes daily   |
|                 |                                    | Lying awake (sleep latency)                            | 39.49 (43.5) minutes per night |
|                 |                                    | Night time awakening                                   | 96.09 (43.5) minutes           |
|                 |                                    | Sleep - daytime                                        | 54.01 (44.2) minutes daily     |

WPAIQ: work productivity and activity impairment questionnaire; IIEF: International index of erectile function; PLATINO: Proyecto LatinoAmericano de Investigación en Obstrucción Pulmonar.

**Table OS5:** Individual study results.

**Online Supplement - Population level dataset comparisons**

|                                                                                                                                                                                                                         | Time spent in activity (min/d) |              |              |
|-------------------------------------------------------------------------------------------------------------------------------------------------------------------------------------------------------------------------|--------------------------------|--------------|--------------|
|                                                                                                                                                                                                                         | COPD                           | ATUS         | HETUS        |
| <b>Chores</b>                                                                                                                                                                                                           | <b>53</b>                      | <b>197.1</b> | <b>235.5</b> |
| Housework                                                                                                                                                                                                               | 23                             |              |              |
| Household activities (housework; cooking; lawn and garden care; pet care; vehicle maintenance and repair; home maintenance, repair, decoration, and renovation; and household management and organizational activities) | 26                             | 140.7        | 235.5        |
| Purchasing goods and services                                                                                                                                                                                           |                                | 50.7         |              |
| Caregiving and helping household members                                                                                                                                                                                | 4                              | 5.7          |              |
| <b>Screen Time</b>                                                                                                                                                                                                      | <b>300</b>                     | <b>0</b>     | <b>235</b>   |
| Watching TV                                                                                                                                                                                                             | 300                            |              | 167.5        |
| Other media                                                                                                                                                                                                             |                                |              | 67.5         |
| <b>Self-Care &amp; Sleep</b>                                                                                                                                                                                            | <b>465</b>                     | <b>686.1</b> | <b>698.5</b> |
| <b>Self-Care</b>                                                                                                                                                                                                        | <b>120</b>                     |              | <b>163</b>   |
| Showering                                                                                                                                                                                                               | 60                             |              |              |
| Eating                                                                                                                                                                                                                  | 60                             | 86.1         |              |
| <b>Personnel care (inc Sleep)</b>                                                                                                                                                                                       |                                | 585          |              |
| Telephone calls, mail, and e-mail.                                                                                                                                                                                      |                                | 15           |              |
| <b>Sleep</b>                                                                                                                                                                                                            | <b>345</b>                     |              | <b>535.5</b> |
| Nocturnal                                                                                                                                                                                                               | 291                            |              |              |
| Daytime                                                                                                                                                                                                                 | 54                             |              |              |
| Sleep latency                                                                                                                                                                                                           | 41                             |              |              |
| Lying awake                                                                                                                                                                                                             | 96                             |              |              |
| <b>Leisure &amp; Sports</b>                                                                                                                                                                                             | <b>324</b>                     | <b>473.1</b> | <b>165</b>   |
| <b>Socio-cultural</b>                                                                                                                                                                                                   | <b>324</b>                     | <b>34.8</b>  | <b>76</b>    |
| Time spent outdoors                                                                                                                                                                                                     | 168                            |              |              |
| Recreation/Leisure time                                                                                                                                                                                                 | 96                             |              |              |
| Organizational, civic and Religious activities (volunteering, performing civic obligations, religious and spiritual activities)                                                                                         |                                | 34.8         |              |
| Volunteer work                                                                                                                                                                                                          |                                |              | 14.5         |
| Participatory work (social life and Entertainment and culture)                                                                                                                                                          |                                |              | 61.5         |
| Reading                                                                                                                                                                                                                 | 60                             |              |              |
| <b>Sports/Exercise</b>                                                                                                                                                                                                  | <b>13</b>                      | <b>438.3</b> | <b>89</b>    |
| <b>Leisure and sports (sports, exercise, and recreation; socializing &amp; communicating)</b>                                                                                                                           | <b>13</b>                      | 438.3        |              |
| Resting-time out (sports, outdoor activities, hobbies and games)                                                                                                                                                        |                                |              | 89           |
| <b>Transport</b>                                                                                                                                                                                                        | <b>53</b>                      | <b>0</b>     | <b>41</b>    |

|                                              |           |             |             |
|----------------------------------------------|-----------|-------------|-------------|
| Walking                                      | 51        |             |             |
| Cycling                                      | 2         |             |             |
| Travel                                       |           |             | 41          |
| <b>Work/Study</b>                            | <b>49</b> | <b>60.9</b> | <b>15.5</b> |
| Employment                                   | 49        | 46.2        | 14.5        |
| Absenteeism                                  | 13        |             |             |
| Presenteeism                                 | 58        |             |             |
| Caregiving and helping non-household members |           | 14.1        |             |
| Educational Activities                       |           | 0.6         |             |
| Study                                        |           |             | 1           |

min/d: minutes per day, COPD: Chronic Obstructive Pulmonary Disease, ATUS: American Time Use Survey; HETUS Harmonized European Time Use Survey

**Table OS6.1:** Time spent engaged in specific activities (in min/d) – Synthesised COPD data (this review) versus American and European Time Use survey data.

|                              | Dataset    |              |              | % of day devoted to activity group |            |            |
|------------------------------|------------|--------------|--------------|------------------------------------|------------|------------|
|                              | COPD       | ATUS         | HETUS        | COPD                               | ATUS       | HETUS      |
| <b>Chores</b>                | <b>53</b>  | <b>197.1</b> | <b>235.5</b> | <b>3%</b>                          | <b>14%</b> | <b>17%</b> |
| <b>Screen Time</b>           | <b>300</b> | <b>0</b>     | <b>235</b>   | <b>19%</b>                         | <b>0%</b>  | <b>17%</b> |
| <b>Self-Care &amp; Sleep</b> | <b>465</b> | <b>686.1</b> | <b>698.5</b> | <b>29%</b>                         | <b>48%</b> | <b>50%</b> |
| <b>Leisure &amp; Sports</b>  | <b>324</b> | <b>473.1</b> | <b>165</b>   | <b>20%</b>                         | <b>33%</b> | <b>12%</b> |
| <b>Transport</b>             | <b>13</b>  | <b>0</b>     | <b>41</b>    | <b>1%</b>                          | <b>0%</b>  | <b>3%</b>  |
| <b>Work/Study</b>            | <b>49</b>  | <b>60.9</b>  | <b>15.5</b>  | <b>3%</b>                          | <b>4%</b>  | <b>1%</b>  |

COPD: Chronic Obstructive Pulmonary Disease, ATUS: American Time Use Survey; HETUS Harmonized European Time Use Survey

**Table OS6.2:** Percentage of an average day devoted to specific activity domains.
